# Supplementary material for: Electroreductive synthesis of polyfunctionalized pyridin-2-ones from acetoacetanilides and carbon disulfide with oxygen evolution
Source: Royal Society of Chemistry journal article supplement (doi:10.1039/d1ob02379a), 2022-01-01

## **Supporting Information**

### **Electroreductive Synthesis of Polyfunctionalized Pyridin-2-Ones from Acetoacetanilides and Carbon Disulfide with Oxygen Evolution**

Lichun Xu, Zhongxiao Ma, Xi Hu, Xin Zhang, Shulin Gao, Deqiang Liang,\* Baoling Wang, Weili Li, and Yanni Li\*

<sup>a</sup>School of Chemistry and Chemical Engineering, Kunming University, Kunming 650214, China

E-mail: liangdq695@nenu.edu.cn, liyanni@kmu.edu.cn

# Table of Contents

|                                                                                               |           |
|-----------------------------------------------------------------------------------------------|-----------|
| <b>I. General considerations.....</b>                                                         | <b>3</b>  |
| <b>II. Optimization of reaction conditions.....</b>                                           | <b>4</b>  |
| <b>III. Experimental details .....</b>                                                        | <b>7</b>  |
| 1. General procedure for the electrosynthesis of pyridin-2-ones <b>2</b> .....                | 7         |
| 2. General procedure for quenching experiments.....                                           | 8         |
| 3. Procedure for gram-scale experiment.....                                                   | 8         |
| 4. Electricity on-off experiments.....                                                        | 9         |
| 4. Reaction kinetic profiles.....                                                             | 10        |
| 5. Procedures for Br <sub>2</sub> detection experiments .....                                 | 10        |
| 6. Oxygen detection tests.....                                                                | 11        |
| <b>IV. Cyclic voltammetry studies .....</b>                                                   | <b>13</b> |
| <b>V. Spectral data of products .....</b>                                                     | <b>21</b> |
| <b>VI. Single crystal X-ray diffraction studies .....</b>                                     | <b>32</b> |
| <b>VII. UV-vis spectra.....</b>                                                               | <b>39</b> |
| <b>VIII. IR spectra .....</b>                                                                 | <b>41</b> |
| <b>IX. Copies of <sup>1</sup>H, <sup>19</sup>F, <sup>13</sup>C and DEPT NMR spectra .....</b> | <b>44</b> |

## I. General considerations

Unless otherwise stated, commercially available chemicals were used without treatment. Reactions were monitored by thin layer chromatography (TLC) using silica gel F254 plates. Products were purified by column chromatography over 300-400 mesh silica gel under a positive pressure of air.  $^1\text{H}$  NMR,  $^{19}\text{F}$  NMR,  $^{13}\text{C}$  NMR and DEPT NMR spectra were recorded at 25 °C on a Bruker Ascend<sup>TM</sup> 400 spectrometer using TMS as internal standard. High-resolution mass spectra (HRMS) were obtained using a Bruker microTOF II Focus spectrometer (ESI). Cyclic voltammetry studies were carried out on a CHI600E electrochemical workstation (Shanghai CH Instruments Co., China). UV-Vis measurements were carried out on a UV-2450 UV-Visible spectrophotometer (Shimadzu, Japan), and the IR spectra were recorded from KBr pellets in the wavenumbers of 4000~400  $\text{cm}^{-1}$  using Cary 600 Series FTIR Spectrometer (Agilent Technologies Inc., USA). Electrolysis was performed using a DJS-292B dual display potentiostat (Shanghai Xinrui Instruments Co., China, Figure S1).

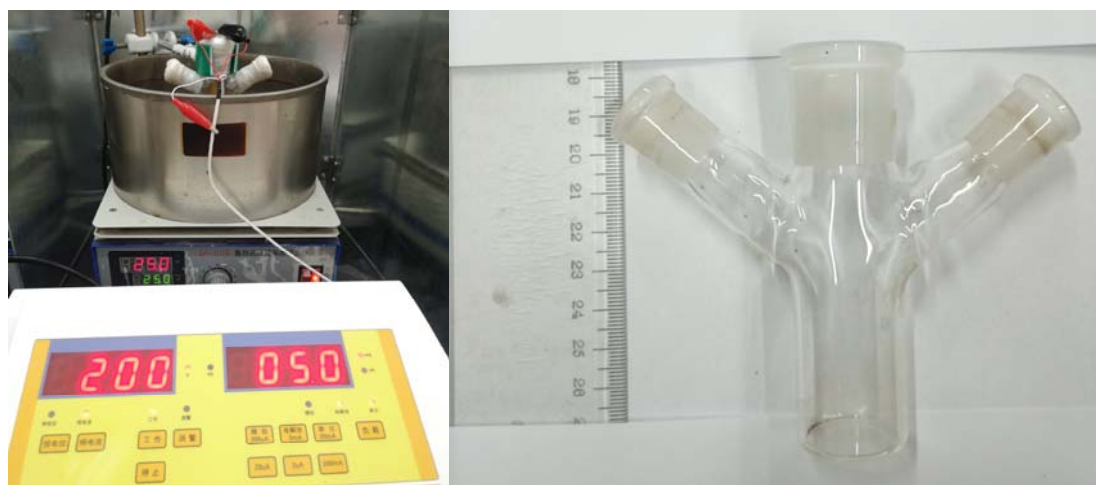

**Figure S1** Electrochemical setup

## II. Optimization of reaction conditions

**Table S1** Electrolyte and base screenings<sup>a</sup>

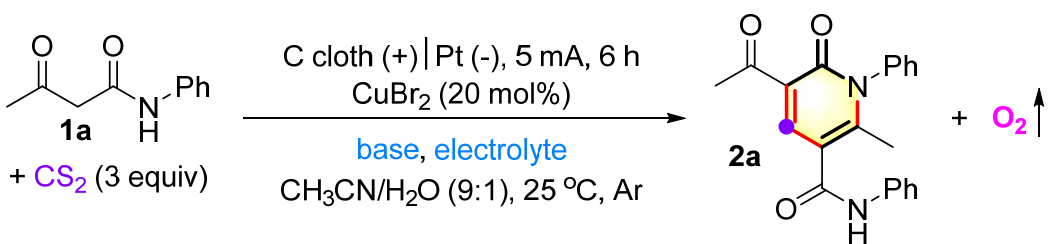

| entry | electrolyte (equiv)                                        | base (equiv)                           | isolated yield (%) |
|-------|------------------------------------------------------------|----------------------------------------|--------------------|
| 1     | none                                                       | K <sub>2</sub> CO <sub>3</sub> (1)     | trace              |
| 2     | <b>TBAB (1)</b>                                            | <b>K<sub>2</sub>CO<sub>3</sub> (1)</b> | 44                 |
| 3     | CsBr (1)                                                   | K <sub>2</sub> CO <sub>3</sub> (1)     | 22                 |
| 4     | TBAI (1)                                                   | K <sub>2</sub> CO <sub>3</sub> (1)     | trace              |
| 5     | TBAC (1)                                                   | K <sub>2</sub> CO <sub>3</sub> (1)     | trace              |
| 6     | <i>n</i> Bu <sub>4</sub> NBF <sub>4</sub> (1)              | K <sub>2</sub> CO <sub>3</sub> (1)     | 22                 |
| 7     | LiClO <sub>4</sub> (1)                                     | K <sub>2</sub> CO <sub>3</sub> (1)     | trace              |
| 8     | TBAB (0.5)                                                 | K <sub>2</sub> CO <sub>3</sub> (1)     | 38                 |
| 9     | <i>n</i> Bu <sub>4</sub> NBF <sub>4</sub> (1) + TBAB (0.2) | K <sub>2</sub> CO <sub>3</sub> (1)     | 27                 |
| 10    | TBAB (1)                                                   | none                                   | nr                 |
| 11    | TBAB (1)                                                   | Na <sub>2</sub> CO <sub>3</sub> (1)    | 40                 |
| 12    | TBAB (1)                                                   | Cs <sub>2</sub> CO <sub>3</sub> (1)    | 41                 |
| 13    | TBAB (1)                                                   | KHCO <sub>3</sub> (1)                  | trace              |
| 14    | TBAB (1)                                                   | K <sub>3</sub> PO <sub>4</sub> (1)     | 20                 |
| 15    | TBAB (1)                                                   | <i>t</i> -BuOK (1)                     | 37                 |
| 16    | TBAB (1)                                                   | 2,6-lutidine                           | nr                 |
| 17    | TBAB (1)                                                   | Et <sub>3</sub> N (1)                  | trace              |
| 18    | TBAB (1)                                                   | K <sub>2</sub> CO <sub>3</sub> (0.5)   | 37                 |

<sup>a</sup> Undivided cell, carbon cloth anode (15 mm × 15 mm × 0.33 mm, WOS1009, Taiwan CeTech), platinum plate cathode (15 mm × 15 mm × 0.3 mm), constant current = 5.0 mA, **1a** (0.5 mmol), CS<sub>2</sub> (1.5 mmol), CuBr<sub>2</sub> (0.1 mmol), CH<sub>3</sub>CN/H<sub>2</sub>O (9:1, v/v, 12.0 mL), Ar, 25 °C, 6 h.

**Table S2** Sacrificial anode and agent screenings<sup>a</sup>

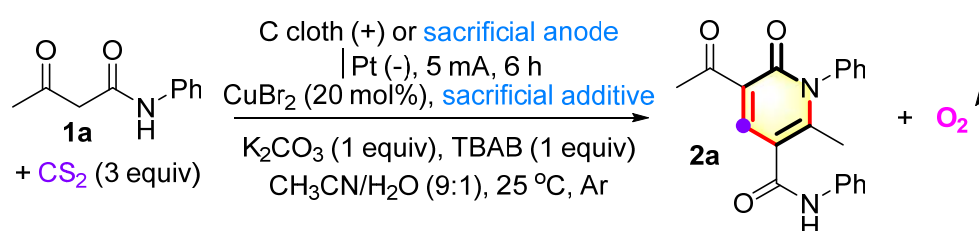

| entry | anode           | sacrifice (equiv)                  | isolated yield (%) |
|-------|-----------------|------------------------------------|--------------------|
| 1     | C cloth         | <i>i</i> Pr <sub>2</sub> NEt (0.5) | 16                 |
| 2     | C cloth         | HBpin (0.5)                        | 27                 |
| 3     | Cu              | none                               | trace              |
| 4     | stainless steel | none                               | trace              |
| 5     | Ni              | none                               | trace              |

<sup>a</sup> Undivided cell, platinum plate cathode (15 mm × 15 mm × 0.3 mm), constant current = 5.0 mA, **1a** (0.5 mmol), CS<sub>2</sub> (1.5 mmol), CuBr<sub>2</sub> (0.1 mmol), K<sub>2</sub>CO<sub>3</sub> (0.5 mmol), TBAB (0.5 mmol), CH<sub>3</sub>CN/H<sub>2</sub>O (9:1, v/v, 12.0 mL), Ar, 25 °C, 6 h.

**Table S3** Electrode and solvent screenings<sup>a</sup>

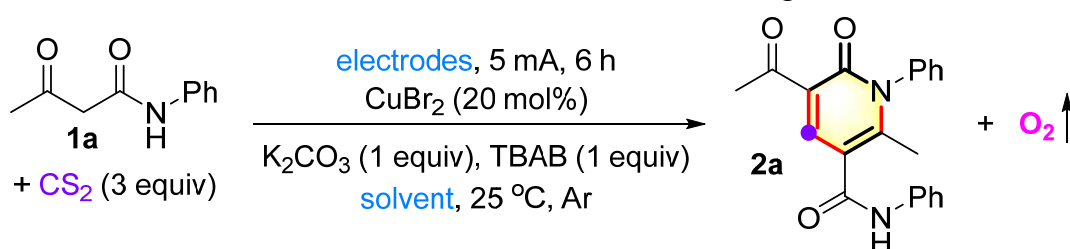

| entry | anode          | cathode         | solvent                                      | isolated yield (%) |
|-------|----------------|-----------------|----------------------------------------------|--------------------|
| 1     | C cloth        | Pt              | DCE/H <sub>2</sub> O (9:1)                   | 28                 |
| 2     | C cloth        | Pt              | THF/H <sub>2</sub> O (9:1)                   | 0                  |
| 3     | C cloth        | Pt              | DMF/H <sub>2</sub> O (9:1)                   | 11                 |
| 4     | C cloth        | Pt              | DMSO/H <sub>2</sub> O (9:1)                  | 17                 |
| 5     | C cloth        | Pt              | MeOH/H <sub>2</sub> O (9:1)                  | trace              |
| 6     | C cloth        | Pt              | CH <sub>3</sub> CN/MeOH (9:1)                | trace              |
| 7     | C cloth        | Pt              | CH <sub>3</sub> CN/H <sub>2</sub> O (4:1)    | 38                 |
| 8     | C cloth        | Pt              | <b>CH<sub>3</sub>CN/H<sub>2</sub>O (6:1)</b> | 54                 |
| 9     | C cloth        | Pt              | CH <sub>3</sub> CN/H <sub>2</sub> O (11:1)   | 32                 |
| 10    | Pt             | Pt              | CH <sub>3</sub> CN/H <sub>2</sub> O (6:1)    | 25                 |
| 11    | graphite rod   | Pt              | CH <sub>3</sub> CN/H <sub>2</sub> O (6:1)    | 20                 |
| 12    | graphite felt  | Pt              | CH <sub>3</sub> CN/H <sub>2</sub> O (6:1)    | 21                 |
| 13    | graphite paper | Pt              | CH <sub>3</sub> CN/H <sub>2</sub> O (6:1)    | 31                 |
| 14    | C cloth        | Ni              | CH <sub>3</sub> CN/H <sub>2</sub> O (6:1)    | 51                 |
| 15    | C cloth        | Ni foam         | CH <sub>3</sub> CN/H <sub>2</sub> O (6:1)    | 25                 |
| 16    | C cloth        | stainless steel | CH <sub>3</sub> CN/H <sub>2</sub> O (6:1)    | 49                 |
| 17    | C cloth        | Cu              | CH <sub>3</sub> CN/H <sub>2</sub> O (6:1)    | 30                 |
| 18    | C cloth        | graphite rod    | CH <sub>3</sub> CN/H <sub>2</sub> O (6:1)    | 42                 |
| 19    | C cloth        | C cloth         | CH <sub>3</sub> CN/H <sub>2</sub> O (6:1)    | 46                 |
| 20    | C cloth        | graphite paper  | CH <sub>3</sub> CN/H <sub>2</sub> O (6:1)    | 50                 |

<sup>a</sup> Undivided cell, electrodes, constant current = 5.0 mA, **1a** (0.5 mmol), CS<sub>2</sub> (1.5 mmol), CuBr<sub>2</sub> (0.1 mmol), K<sub>2</sub>CO<sub>3</sub> (0.5 mmol), TBAB (0.5 mmol), solvent (12.0 mL), Ar, 25 °C, 6 h.

**Table S4** Metal or Lewis acid screenings<sup>a</sup>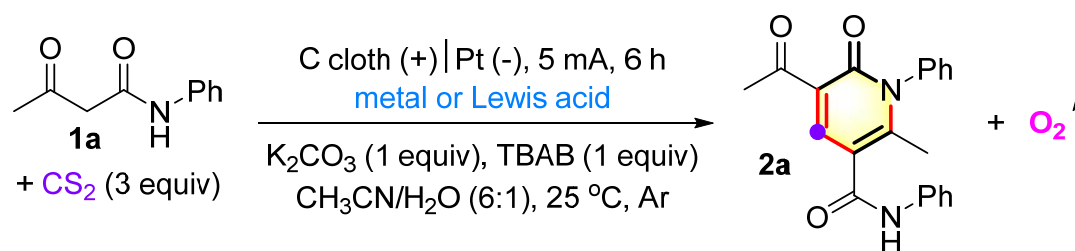

| entry | metal or Lewis acid (mol%) | isolated yield (%) |
|-------|----------------------------|--------------------|
| 1     | none                       | nr                 |
| 2     | CuBr (20)                  | 23                 |
| 3     | CuCl <sub>2</sub> (20)     | 50                 |
| 4     | CuSO <sub>4</sub> (20)     | 46                 |
| 5     | Cu(acac) <sub>2</sub> (20) | nr                 |
| 6     | CuTc (20)                  | 33                 |
| 7     | Pd(OAc) <sub>2</sub> (20)  | 0                  |
| 8     | CoCl <sub>2</sub> (20)     | trace              |
| 9     | NiCl <sub>2</sub> (20)     | 42                 |
| 10    | AgNO <sub>3</sub> (20)     | trace              |
| 11    | MnCl <sub>2</sub> (20)     | trace              |
| 12    | FeCl <sub>3</sub> (20)     | trace              |
| 13    | SnCl <sub>4</sub> (20)     | 40                 |
| 14    | CuBr <sub>2</sub> (10)     | 11                 |

<sup>a</sup> Undivided cell, carbon cloth anode (15 mm × 15 mm × 0.33 mm, WOS1009, Taiwan CeTech), platinum plate cathode (15 mm × 15 mm × 0.3 mm), constant current = 5.0 mA, **1a** (0.5 mmol), CS<sub>2</sub> (1.5 mmol), K<sub>2</sub>CO<sub>3</sub> (0.5 mmol), TBAB (0.5 mmol), CH<sub>3</sub>CN/H<sub>2</sub>O (6:1, v/v, 12.0 mL), Ar, 25 °C, 6 h.

**Table S5** CS<sub>2</sub>, current, time and ligand optimization<sup>a</sup>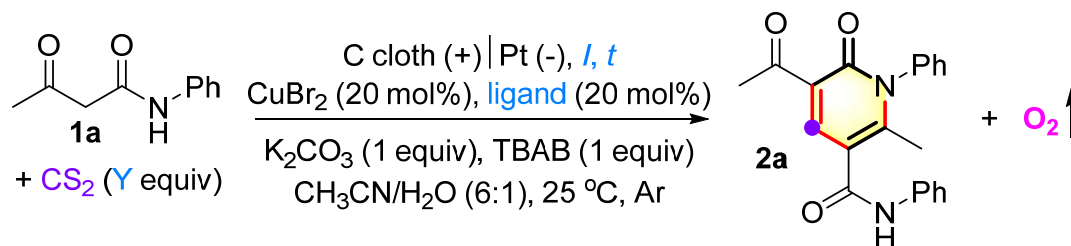

| entry | Y | <i>I</i> (mA), <i>t</i> (h) | ligand           | isolated yield (%) |
|-------|---|-----------------------------|------------------|--------------------|
| 1     | 2 | 5, 6                        | —                | 51                 |
| 2     | 3 | 3, 10                       | —                | 52                 |
| 3     | 3 | 7.5, 4                      | —                | 51                 |
| 4     | 3 | <b>5, 7.5</b>               | —                | 61                 |
| 5     | 3 | 5, 9                        | —                | 54                 |
| 6     | 3 | 5, 7.5                      | PPh <sub>3</sub> | 55                 |

|    |          |               |                  |    |
|----|----------|---------------|------------------|----|
| 7  | 3        | 5, 7.5        | PCy <sub>3</sub> | 40 |
| 8  | 3        | 5, 7.5        | dppe             | 57 |
| 9  | 3        | 5, 7.5        | dppp             | 50 |
| 10 | <b>3</b> | <b>5, 7.5</b> | <b>dppb</b>      | 68 |
| 11 | 3        | 5, 7.5        | dppf             | 57 |
| 12 | 3        | 5, 7.5        | phen             | 37 |
| 13 | 3        | 5, 7.5        | dtbbpy           | 52 |
| 14 | 3        | 5, 7.5        | BOZ              | 43 |

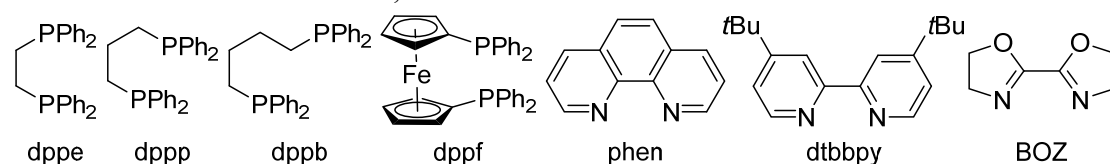

<sup>a</sup> Undivided cell, carbon cloth anode (15 mm × 15 mm × 0.33 mm, WOS1009, Taiwan CeTech), platinum plate cathode (15 mm × 15 mm × 0.3 mm), constant current, **1a** (0.5 mmol), CS<sub>2</sub>, CuBr<sub>2</sub> (0.1 mmol), K<sub>2</sub>CO<sub>3</sub> (0.5 mmol), TBAB (0.5 mmol), CH<sub>3</sub>CN/H<sub>2</sub>O (6:1, v/v, 12.0 mL), Ar, 25 °C.

### III. Experimental details

#### 1. General procedure for the electro-synthesis of pyridin-2-ones **2**

A custom-made undivided cell (Figure S1), equipped with a magnetic stirring bar, a carbon cloth anode (15 mm × 15 mm × 0.33 mm, WOS1009, Taiwan CeTech) and a platinum plate cathode (15 mm × 15 mm × 0.3 mm, new or carefully polished until shining), was charged under argon sequentially with β-keto amide **1** (0.5 mmol), tetrabutylammonium bromide (TBAB, 1.0 equiv, 0.5 mmol, 161 mg), K<sub>2</sub>CO<sub>3</sub> (1.0 equiv, 0.5 mmol, 69 mg), 1,4-bis(diphenylphosphino)butane (dppb, 20 mol%, 0.1 mmol, 43 mg), CH<sub>3</sub>CN (10.3 mL), and a solution of CuBr<sub>2</sub> (20 mol%, 0.1 mmol, 22 mg) in H<sub>2</sub>O (1.7 mL), followed by the addition of CS<sub>2</sub> (3.0 equiv, 1.5 mmol, 0.091 mL). The mixture was electrolyzed with stirring using a constant current of 5.0 mA at 25 °C (oil bath) for 7.5 h; then it was quenched with water (50.0 mL) and extracted with CH<sub>2</sub>Cl<sub>2</sub> (30.0 mL) four times. The residue obtained after evaporation of the combined organic solvent was purified by column chromatography on silica gel (petroleum ether–ethyl acetate–dichloromethane–triethylamine = 75:15:10:2) to afford pyridin-2-ones **2**.

This reaction is sensitive to electrode state and stirring conditions. New or carefully polished platinum plate cathode is necessary probably due to the passivation by

sulfur-containing species, and there are reproducibility issues when the electrodes are wrapped in black paste.

## 2. General procedure for quenching experiments

A custom-made undivided cell, equipped with a magnetic stirring bar, a carbon cloth anode (15 mm × 15 mm × 0.33 mm, WOS1009, Taiwan CeTech) and a platinum plate cathode (15 mm × 15 mm × 0.3 mm, new or carefully polished until shining), was charged under argon sequentially with *N*-(4-fluorophenyl)-3-oxobutanamide **1b4** (0.5 mmol, 98 mg), TBAB (1.0 equiv, 0.5 mmol, 161 mg), K<sub>2</sub>CO<sub>3</sub> (1.0 equiv, 0.5 mmol, 69 mg), dppb (20 mol%, 0.1 mmol, 43 mg), a quencher, CH<sub>3</sub>CN (10.3 mL), and a solution of CuBr<sub>2</sub> (20 mol%, 0.1 mmol, 22 mg) in H<sub>2</sub>O (1.7 mL), followed by the addition of CS<sub>2</sub> (3.0 equiv, 1.5 mmol, 0.091 mL). The mixture was electrolyzed with stirring using a constant current of 5.0 mA at 25 °C (oil bath) for 7.5 h, and the yield of product **2b4** formed was determined by <sup>19</sup>F NMR analysis based on a 4,4'-difluoro-1,1'-biphenyl internal standard.

## 3. Procedure for gram-scale experiment

A 100-mL two-necked flask (Figure S2), equipped with a magnetic stirring bar, a carbon cloth anode (15 mm × 15 mm × 0.33 mm, WOS1009, Taiwan CeTech) and a platinum plate cathode (15 mm × 15 mm × 0.3 mm, new or carefully polished until shining), was charged under argon sequentially with 3-oxo-*N*-(*p*-tolyl)butanamide **1b1** (6.0 mmol, 1.15 g), TBAB (1.0 equiv, 1.93 g), K<sub>2</sub>CO<sub>3</sub> (1.0 equiv, 0.83 g), dppb (20 mol%, 0.51 g), CH<sub>3</sub>CN (94.3 mL), and a solution of CuBr<sub>2</sub> (20 mol%, 0.27 g) in H<sub>2</sub>O (15.7 mL), followed by the addition of CS<sub>2</sub> (3.0 equiv, 1.092 mL). The mixture was electrolyzed with stirring using a constant current of 60.0 mA at 25 °C (oil bath) for 7.5 h, *during which the electrodes were replaced with new ones at 1.5 h intervals*. Then, the reaction was quenched with water (300.0 mL) and extracted with CH<sub>2</sub>Cl<sub>2</sub> (200.0 mL) four times. The residue obtained after evaporation of the combined organic solvent was purified by column chromatography on silica gel (petroleum ether–ethyl acetate–dichloromethane–triethylamine = 75:15:10:2) to afford pyridin-2-ones **2b1** (54%, 607 mg). The current efficiency is 19%.



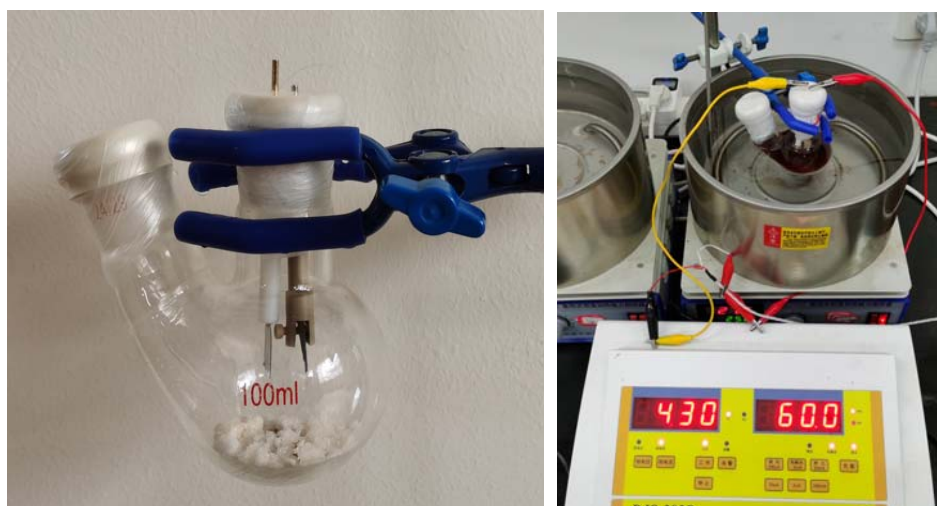

**Figure S2** Setup for gram-scale experiment

#### 4. Electricity on-off experiments

4,4'-Difluoro-1,1'-biphenyl (1 equiv) was added as an internal standard to the reaction mixture before electrolysis using **1b4** as the substrate. 0.05 mL of the crude reaction solution was taken out each time via a syringe and was subjected to  $^{19}\text{F}$  NMR analysis.

|           | A(X) | B(Y)                      |
|-----------|------|---------------------------|
| Long Name | time | $^{19}\text{F}$ NMR yield |
| Units     | h    | %                         |
| Comments  |      |                           |
| 1         | 0    | 0                         |
| 2         | 2    | 16                        |
| 3         | 4    | 19                        |
| 4         | 6    | 46                        |
| 5         | 8    | 51                        |
| 6         | 10   | 75                        |
| 7         | 12   | 70                        |

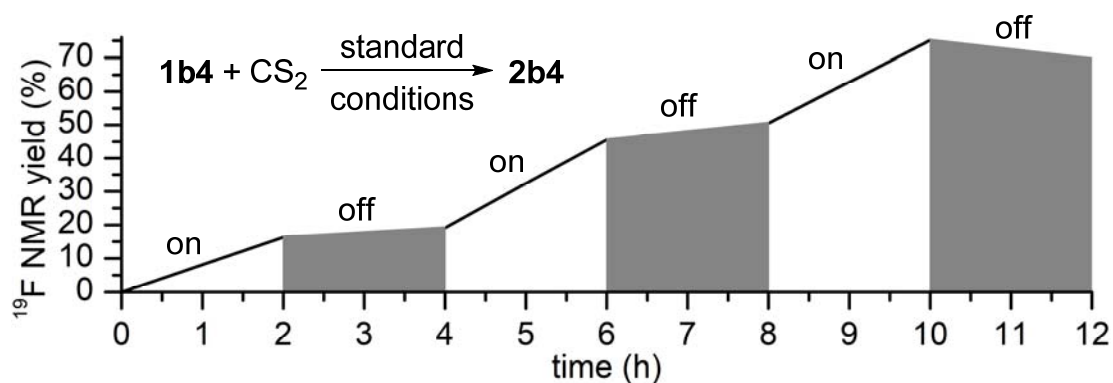

**Figure S3** Intermittent electrolysis experiments

#### 4. Reaction kinetic profiles

4,4'-Difluoro-1,1'-biphenyl (1 equiv) was added as an internal standard to the reaction mixture before electrolysis using **1b4** as the substrate. 0.05 mL of the crude reaction solution was taken out each time via a syringe and was subjected to  $^{19}\text{F}$  NMR analysis.

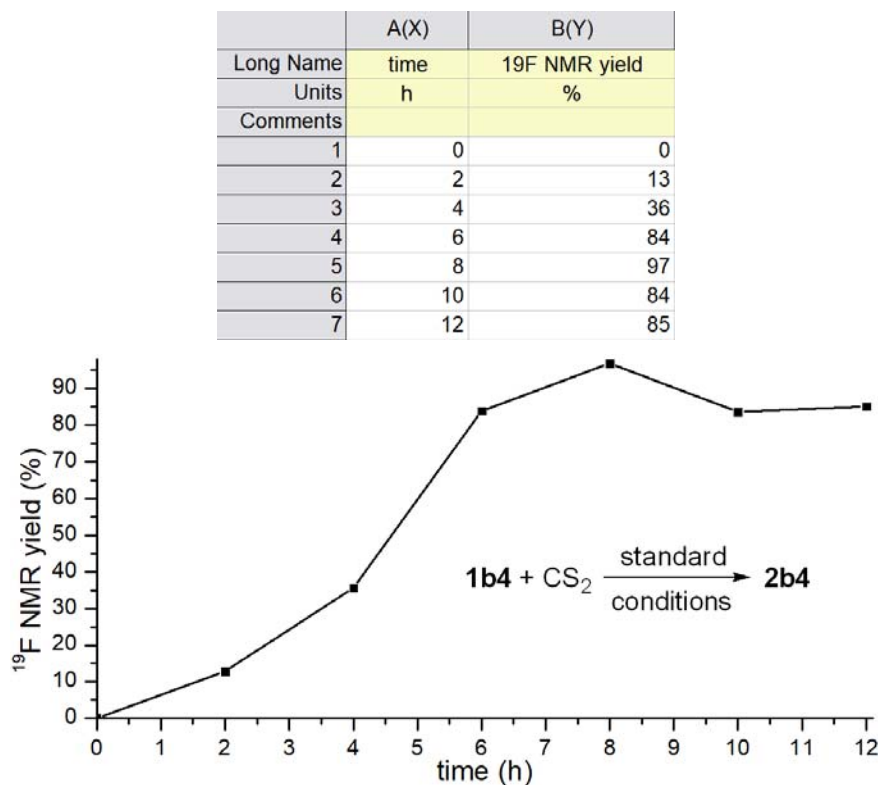

Figure S4 Reaction kinetic profiles

#### 5. Procedures for $\text{Br}_2$ detection experiments

**Conditions 1:** A custom-made undivided cell, equipped with a magnetic stirring bar, a carbon cloth anode (15 mm  $\times$  15 mm  $\times$  0.33 mm, WOS1009, Taiwan CeTech) and a platinum plate cathode (15 mm  $\times$  15 mm  $\times$  0.3 mm, new or carefully polished until shining), was charged under argon sequentially with 3-oxo-*N*-phenylbutanamide **1a** (0.5 mmol, 89 mg), TBAB (1.0 equiv, 0.5 mmol, 161 mg),  $\text{K}_2\text{CO}_3$  (1.0 equiv, 0.5 mmol, 69 mg), dppb (20 mol%, 0.1 mmol, 43 mg), a quencher,  $\text{CH}_3\text{CN}$  (10.3 mL), and a solution of  $\text{CuBr}_2$  (20 mol%, 0.1 mmol, 22 mg) in  $\text{H}_2\text{O}$  (1.7 mL), followed by the addition of  $\text{CS}_2$  (3.0 equiv, 1.5 mmol, 0.091 mL). The mixture was electrolyzed with stirring using a constant current of 5.0 mA at 25  $^\circ\text{C}$  (oil bath) for 7.5 h. Then, phenol (1.0 equiv, 0.5 mmol, 47 mg) was added, and the resultant mixture was stirred

at room temperature for another 1 h under air. The formation of 2,4,6-tribromophenol was checked by comparing with the purchased standard product through TLC and gas chromatography-mass spectrometry (GC-MS) analyses.

**Conditions 2:** A custom-made undivided cell, equipped with a magnetic stirring bar, a carbon cloth anode (15 mm × 15 mm × 0.33 mm, WOS1009, Taiwan CeTech) and a platinum plate cathode (15 mm × 15 mm × 0.3 mm, new or carefully polished until shining), was charged under argon sequentially with 3-oxo-*N*-phenylbutanamide **1a** (0.5 mmol, 89 mg), TBAB (1.0 equiv, 0.5 mmol, 161 mg), K<sub>2</sub>CO<sub>3</sub> (1.0 equiv, 0.5 mmol, 69 mg), dppb (20 mol%, 0.1 mmol, 43 mg), a quencher, CH<sub>3</sub>CN (10.3 mL), and a solution of CuBr<sub>2</sub> (20 mol%, 0.1 mmol, 22 mg) in H<sub>2</sub>O (1.7 mL), followed by the addition of CS<sub>2</sub> (3.0 equiv, 1.5 mmol, 0.091 mL). The mixture was electrolyzed with stirring using a constant current of 5.0 mA at 25 °C (oil bath) for 7.5 h. Then, H<sub>2</sub>O (8.4 mL) and phenol (1.0 equiv, 0.5 mmol, 47 mg) was added, and the resultant mixture was stirred at room temperature for another 1 h under air. The formation of 2,4,6-tribromophenol was checked by comparing with the purchased standard product through TLC and GC-MS analyses.

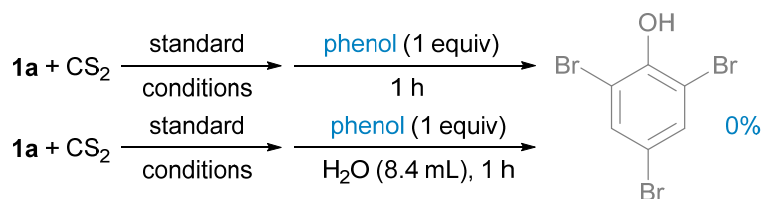

**Scheme S1** Br<sub>2</sub> detection

## 6. Oxygen detection tests

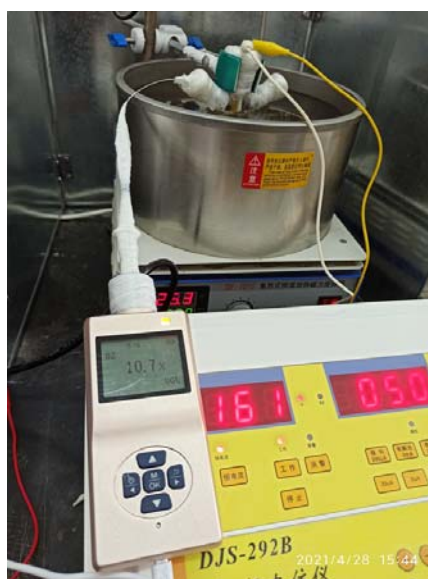

**Figure S5** Setup for oxygen detection tests

The oxygen detection tests were conducted with an O<sub>2</sub> detector (XLA-BX-O2, Figure S5), which was connected with the model reaction under standard conditions by a syringe with pumping on.

|           | A(X) | G1(Y)                  | G2(Y)                 | F1(Y)       | F2(Y)       | E1(Y)       | E2(Y)       | D1(Y)       | D2(Y)       | C1(Y)       | B(Y)        |
|-----------|------|------------------------|-----------------------|-------------|-------------|-------------|-------------|-------------|-------------|-------------|-------------|
| Long Name | time | oxygen conc            | oxygen conc           | oxygen conc | oxygen conc | oxygen conc | oxygen conc | oxygen conc | oxygen conc | oxygen conc | oxygen conc |
| Units     | min  | vol%                   | vol%                  | vol%        | vol%        | vol%        | vol%        | vol%        | vol%        | vol%        | vol%        |
| Comments  |      | run 5, electricity off | run 5, electricity on | run 4, off  | run 4, on   | run 3, off  | run 3, on   | run 2, off  | run 2, on   | run 1, off  | run 1, on   |
| 1         | 0    | 0                      | 0.4                   | 0           | 0           | 0           | 0           | 0           | 0           | 0           | 0.3         |
| 2         | 1    | 0                      | 0.7                   | 0           | 0.1         | 0           | 0.1         | 0           | 0.1         | 0           | 0.4         |
| 3         | 2    | 0.1                    | 0.8                   | 0           | 0.2         | 0.1         | 0.4         | 0           | 0.4         | 0           | 0.9         |
| 4         | 3    | 0.1                    | 1                     | 0           | 0.4         | 0.1         | 0.7         | 0           | 0.8         | 0           | 1.2         |
| 5         | 4    | 0.2                    | 1.2                   | 0           | 0.6         | 0.2         | 1           | 0           | 1           | 0.2         | 1.6         |
| 6         | 5    | 0.4                    | 1.4                   | 0.1         | 0.8         | 0.2         | 1.4         | 0           | 1.2         | 0.4         | 2           |
| 7         | 6    | 0.4                    | 1.6                   | 0.2         | 1.1         | 0.3         | 1.8         | 0           | 1.3         | 0.4         | 2.4         |
| 8         | 7    | 0.5                    | 1.8                   | 0.3         | 1.3         | 0.3         | 2.2         | 0           | 1.4         | 0.4         | 3           |
| 9         | 8    | 0.5                    | 2                     | 0.4         | 1.4         | 0.4         | 2.3         | 0           | 1.6         | 0.4         | 3.2         |
| 10        | 9    | 0.6                    | 2.3                   | 0.5         | 1.6         | 0.4         | 2.3         | 0           | 1.7         | 0.4         | 3.4         |
| 11        | 10   | 0.6                    | 2.4                   | 0.6         | 2           | 0.4         | 2.4         | 0           | 2           | 0.5         | 3.8         |
| 12        | 11   |                        | 2.7                   |             |             |             |             |             |             |             |             |
| 13        | 12   |                        | 2.8                   |             |             |             |             |             |             |             |             |
| 14        | 13   |                        | 2.9                   |             |             |             |             |             |             |             |             |
| 15        | 14   |                        | 3.1                   |             |             |             |             |             |             |             |             |
| 16        | 15   |                        | 3.3                   |             |             |             |             |             |             |             |             |
| 17        | 16   |                        | 3.5                   |             |             |             |             |             |             |             |             |
| 18        | 17   |                        | 3.7                   |             |             |             |             |             |             |             |             |
| 19        | 18   |                        | 3.9                   |             |             |             |             |             |             |             |             |
| 20        | 19   |                        | 4                     |             |             |             |             |             |             |             |             |
| 21        | 20   |                        | 4.5                   |             |             |             |             |             |             |             |             |

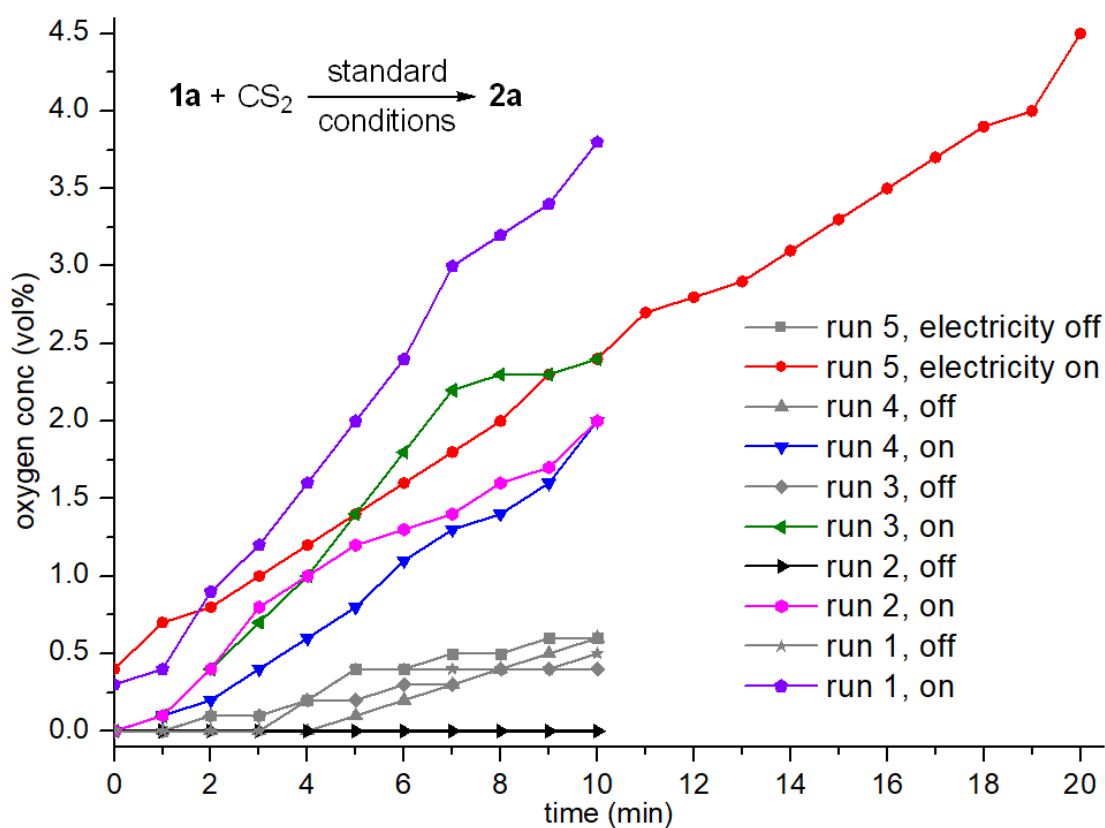

Figure S6 Oxygen detection

## IV. Cyclic voltammetry studies

**General procedure:** Cyclic voltammograms were performed in a three-electrode cell (Figure S1) at room temperature. The working electrode was a glassy carbon (GC) disk electrode, and the counter electrode was a platinum wire. The reference was an Ag/AgCl (KCl) electrode submerged in a saturated aqueous KCl solution, and separated from reactions by a salt bridge. 10 mL of CH<sub>3</sub>CN/H<sub>2</sub>O (6:1, v/v) or CH<sub>3</sub>CN solution containing 1.0 mmol *n*Bu<sub>4</sub>NBF<sub>4</sub> was poured into the electrochemical cell. The scan was started at 0 V and then the potential was then scanned in the negative direction at a scan rate of 100 mV s<sup>-1</sup> unless stated otherwise.

In the cyclic voltammogram of CH<sub>3</sub>CN/H<sub>2</sub>O (6:1) in the region of -2.0–2.0 V vs. Ag/AgCl (red line, Figure S7), the oxidation wave of water is significant.

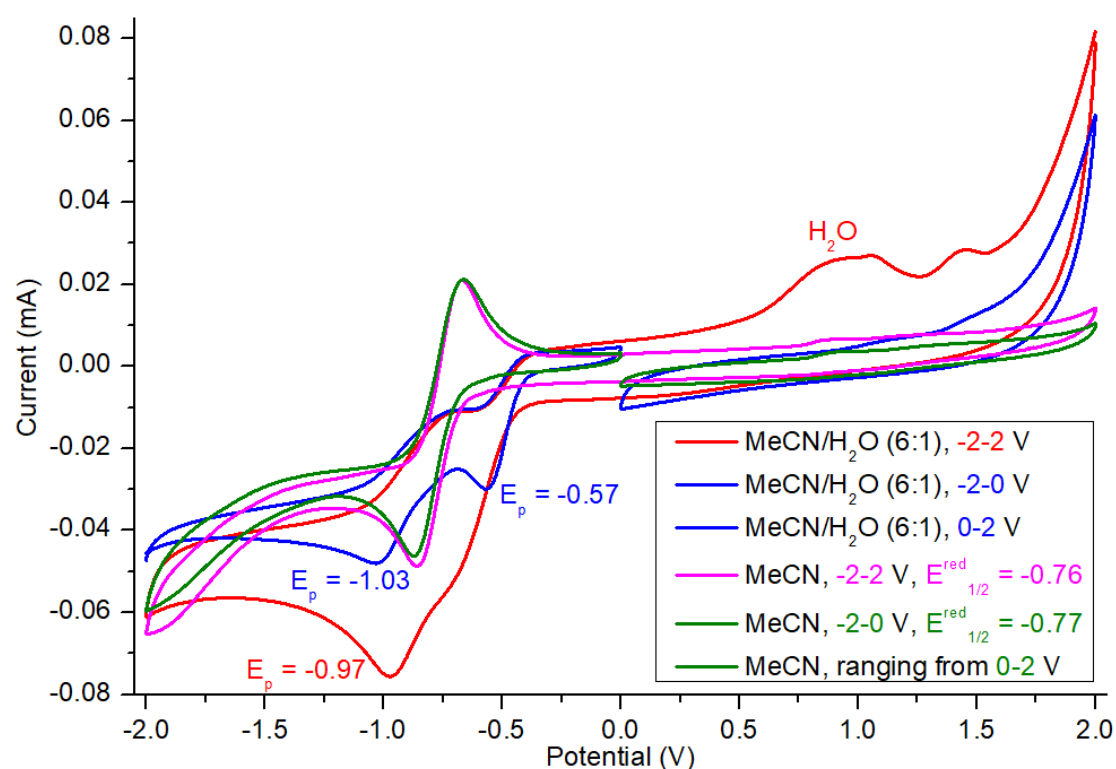

**Figure S7** Cyclic voltammograms of the **solvent** CH<sub>3</sub>CN and the CH<sub>3</sub>CN/H<sub>2</sub>O mixture (6:1, v/v)) with GC as the working electrode, Pt wire as the counter electrode, Ag/AgCl (KCl) as the reference electrode in 0.1 M *n*Bu<sub>4</sub>NBF<sub>4</sub>

New oxidation waves were observed at 0.52 V (in aqueous CH<sub>3</sub>CN) or 0.43 V (in CH<sub>3</sub>CN) upon addition of **1a**, the oxidation potentials of which are 1.53 V (in aqueous CH<sub>3</sub>CN) or 1.85 V (in CH<sub>3</sub>CN) vs. Ag/AgCl (Figures S8 and S9). It seems that the oxidation potentials of H<sub>2</sub>O decreased upon addition of **1a**.

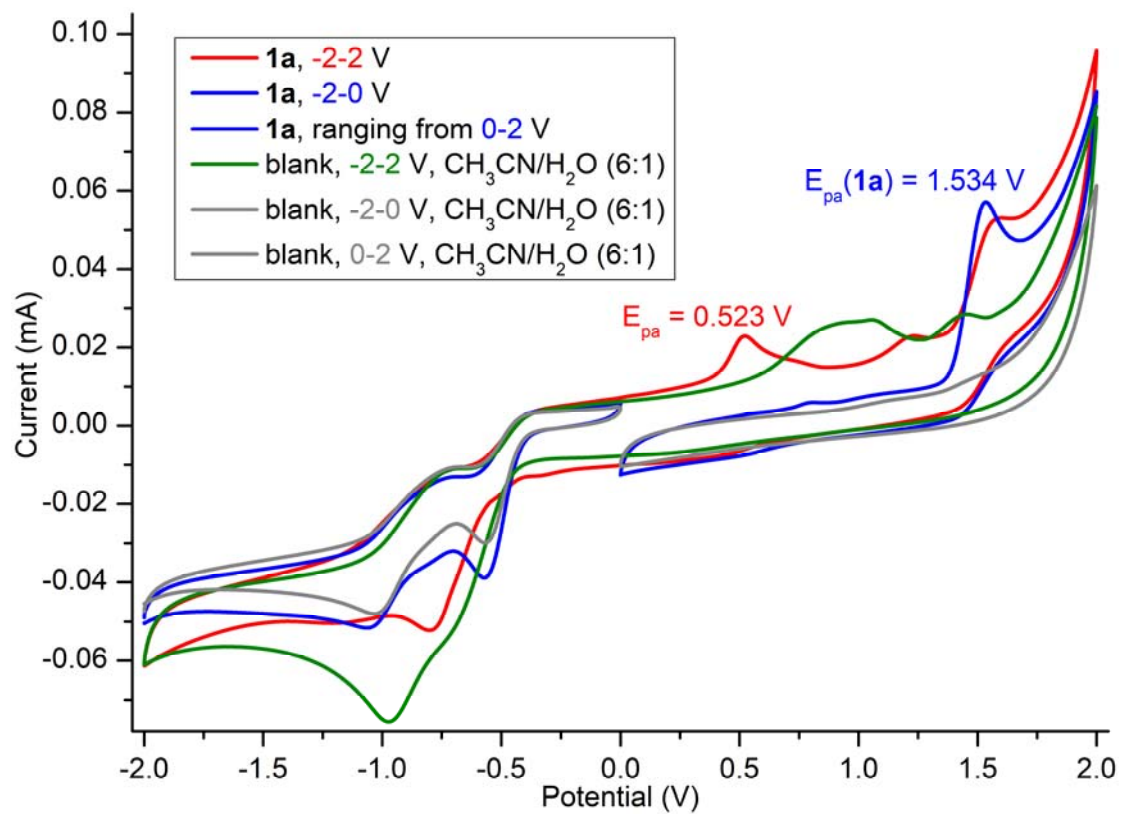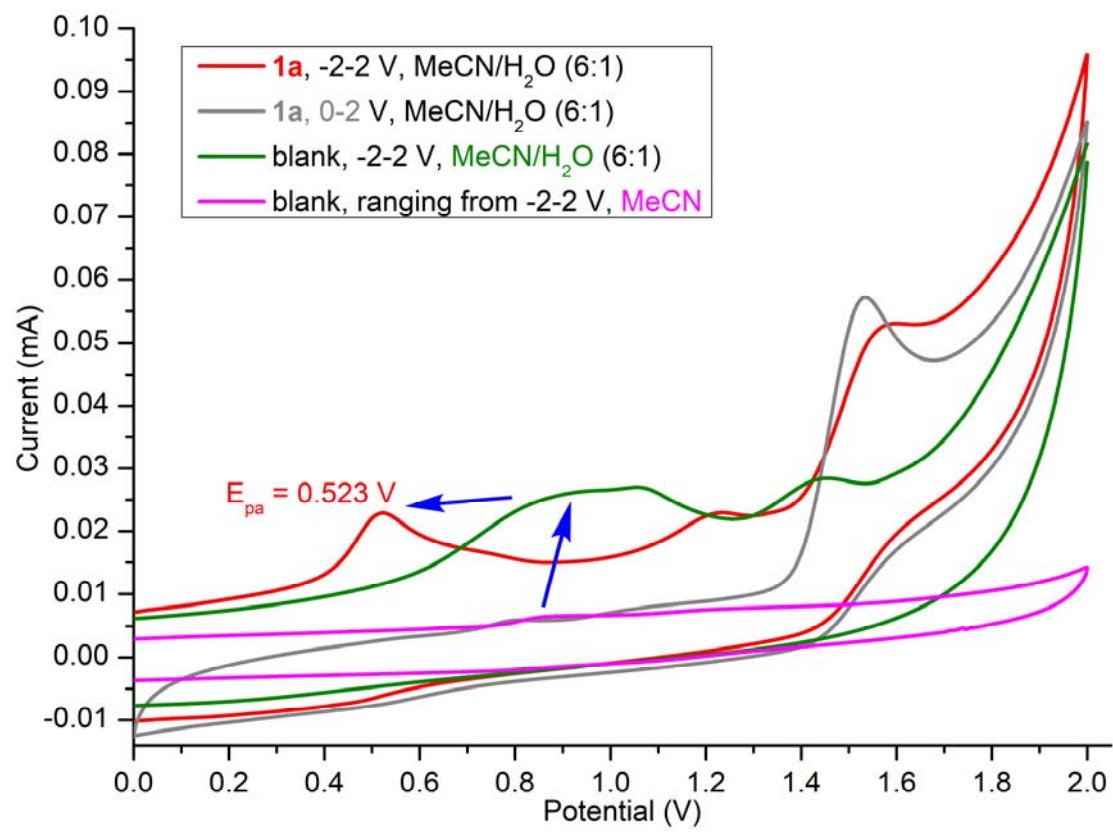

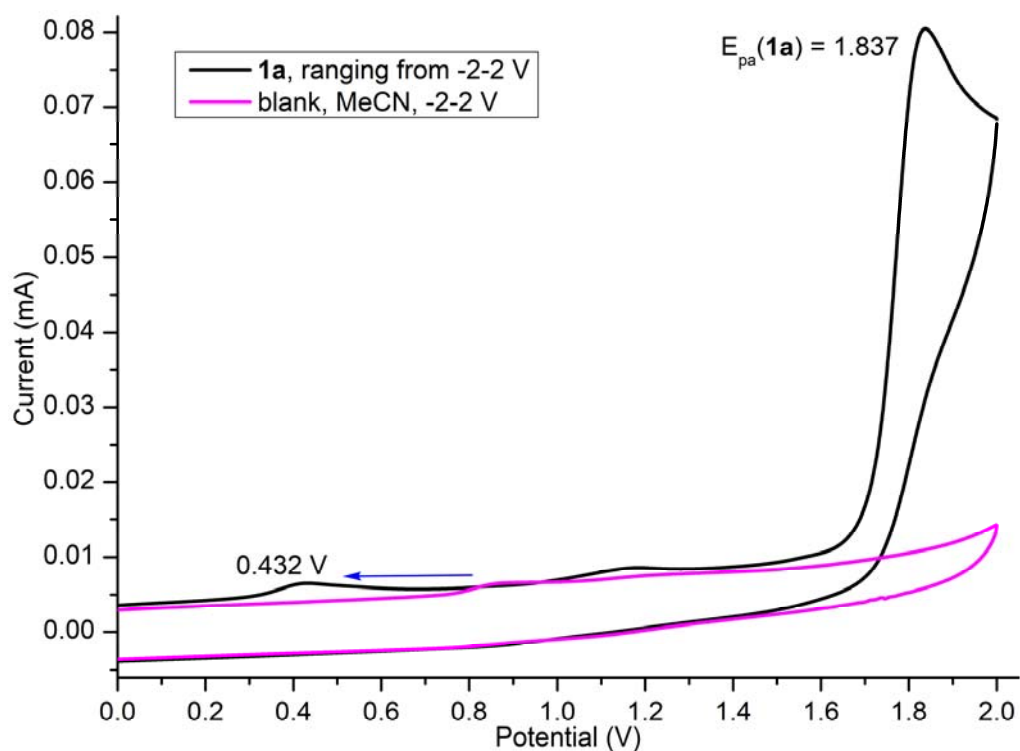

**Figure S8** Cyclic voltammograms of **1a** ( $10^{-3}$  M) in  $\text{CH}_3\text{CN}$  or  $\text{CH}_3\text{CN}/\text{H}_2\text{O}$  (6:1, v/v)) with GC as the working electrode, Pt wire as the counter electrode, Ag/AgCl (KCl) as the reference in 0.1 M  $n\text{Bu}_4\text{NBF}_4$

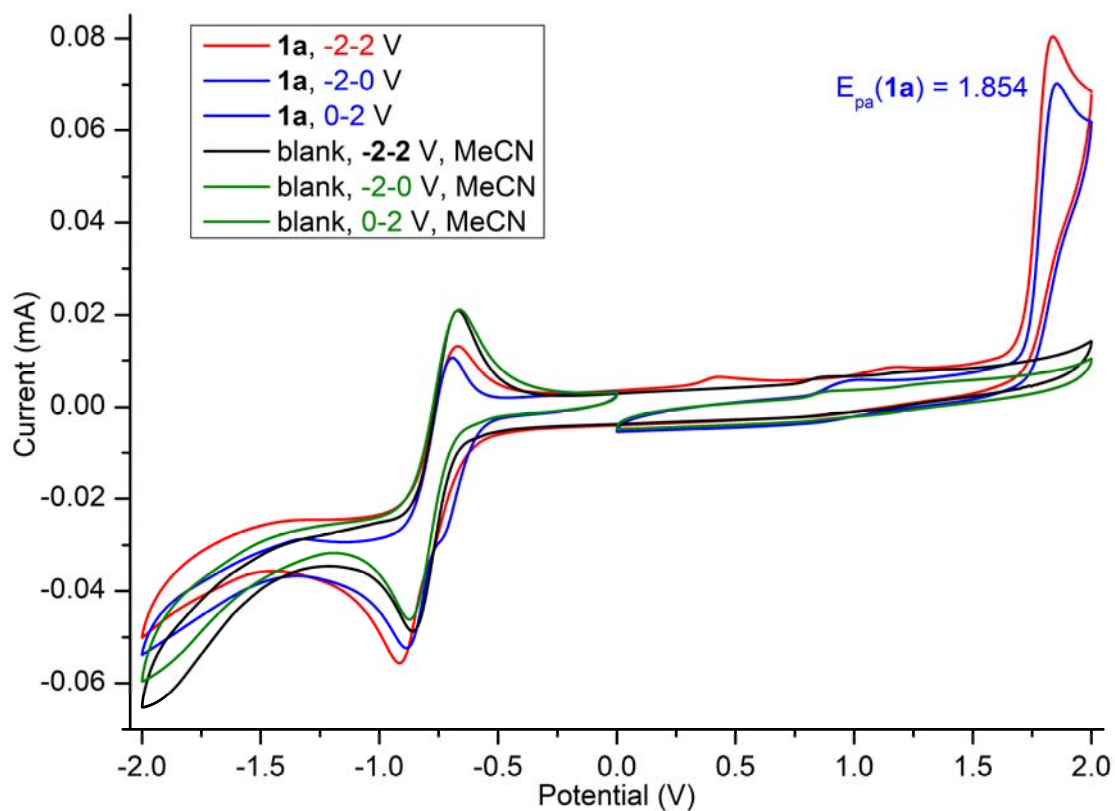

**Figure S9** Cyclic voltammograms of **1a** ( $10^{-3}$  M) in  $\text{CH}_3\text{CN}$

In CH<sub>3</sub>CN/H<sub>2</sub>O (6:1, v/v), higher current responses were observed upon introduction of K<sub>2</sub>CO<sub>3</sub>, and the reduction potentials decreased (red line and pink line, Figure S10).

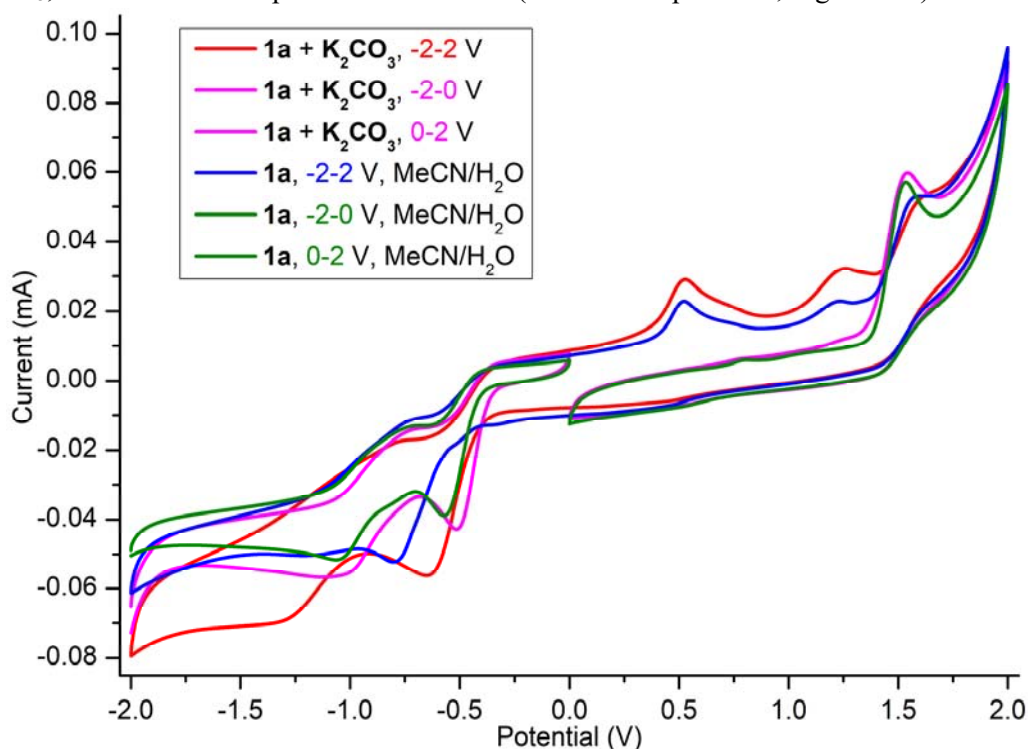

**Figure S10** Cyclic voltammograms of **1a** (10<sup>-3</sup> M in CH<sub>3</sub>CN/H<sub>2</sub>O (6:1, v/v)) in the presence or absence of K<sub>2</sub>CO<sub>3</sub> (10<sup>-3</sup> M) with GC as the working electrode, Pt wire as the counter electrode, Ag/AgCl (KCl) as the reference in 0.1 M *n*Bu<sub>4</sub>NBF<sub>4</sub>

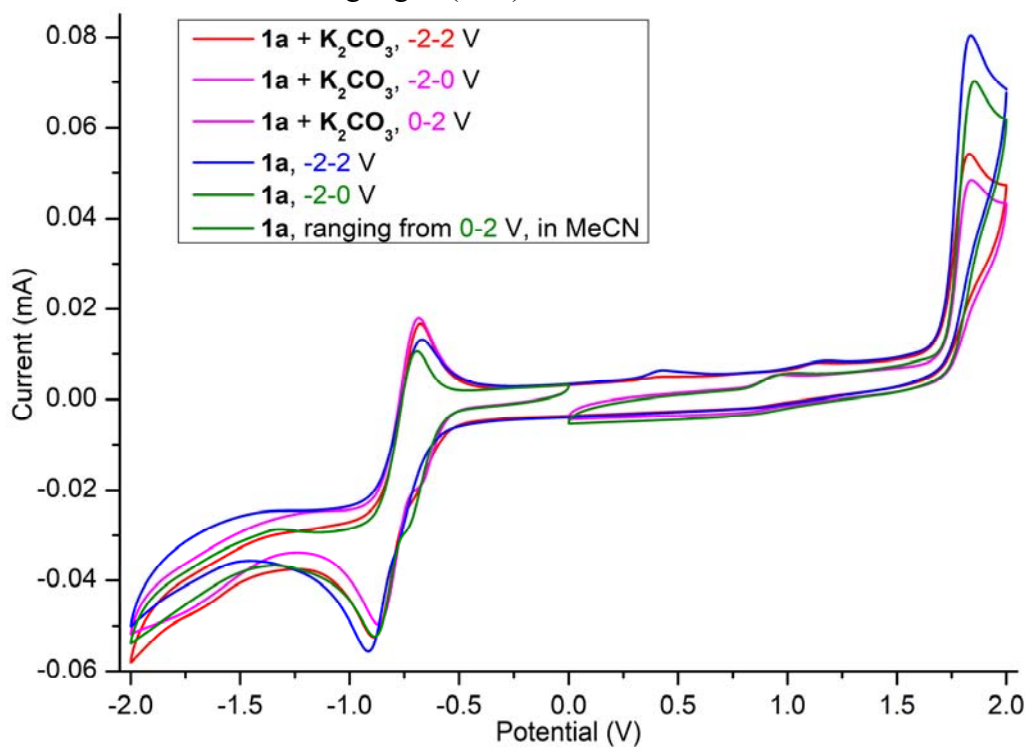

**Figure S11** Cyclic voltammograms of **1a** (10<sup>-3</sup> M in CH<sub>3</sub>CN) in the presence or absence of K<sub>2</sub>CO<sub>3</sub> (10<sup>-3</sup> M) with GC as the working electrode, Pt wire as the counter electrode, Ag/AgCl (KCl) as the reference in 0.1 M *n*Bu<sub>4</sub>NBF<sub>4</sub>



The oxidation potentials of H<sub>2</sub>O decreased as well upon addition of CS<sub>2</sub> (Figures S12-S14).

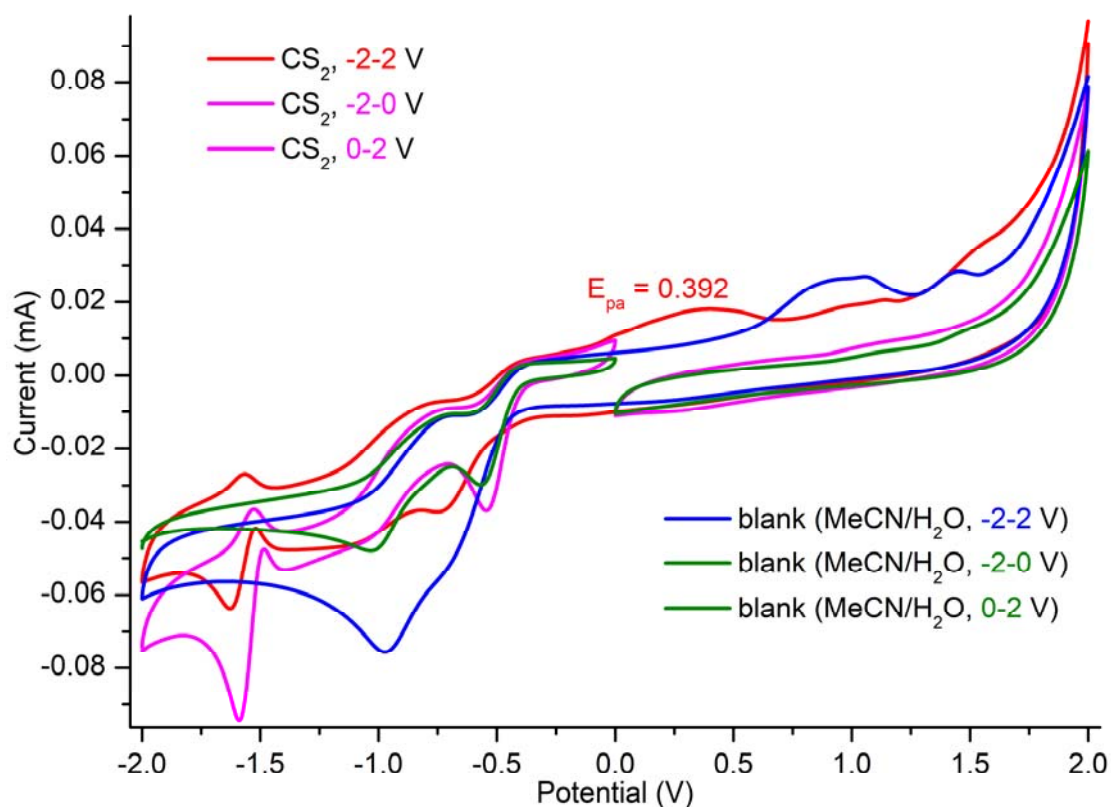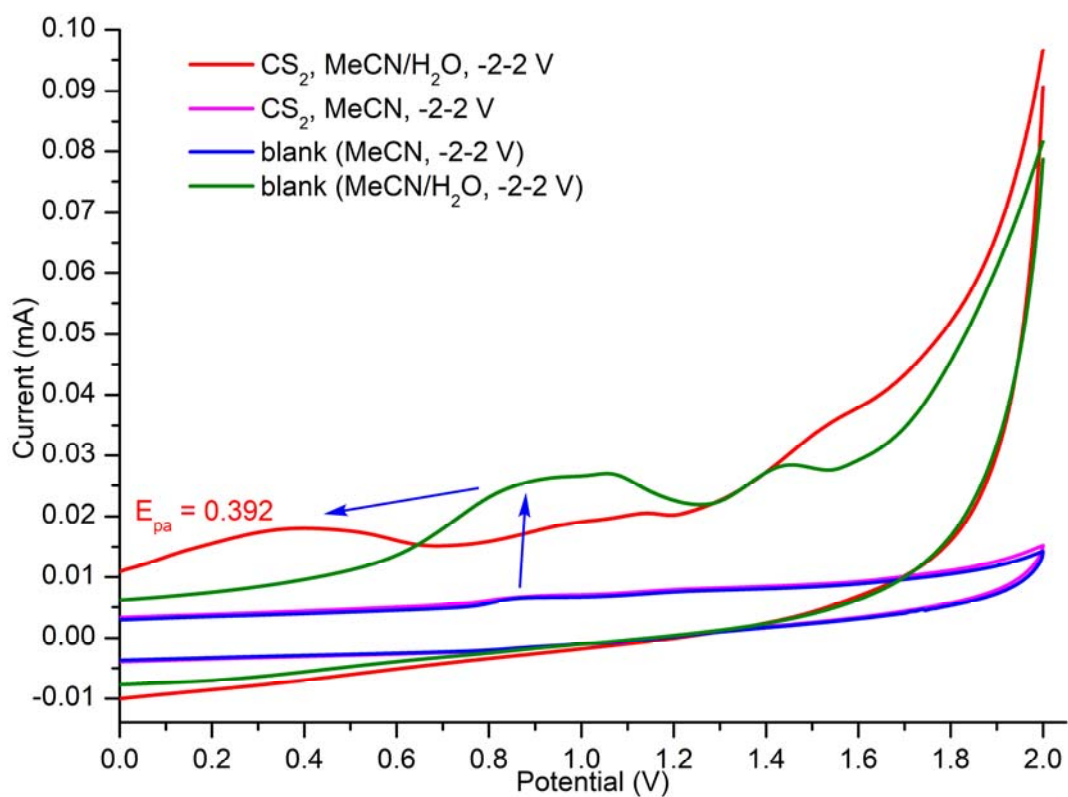

**Figure S12** Cyclic voltammograms of CS<sub>2</sub> (10<sup>-3</sup> M) in CH<sub>3</sub>CN or CH<sub>3</sub>CN/H<sub>2</sub>O (6:1, v/v) with GC as the working electrode, Pt wire as the counter electrode, Ag/AgCl (KCl) as the reference in 0.1 M *n*Bu<sub>4</sub>NBF<sub>4</sub>

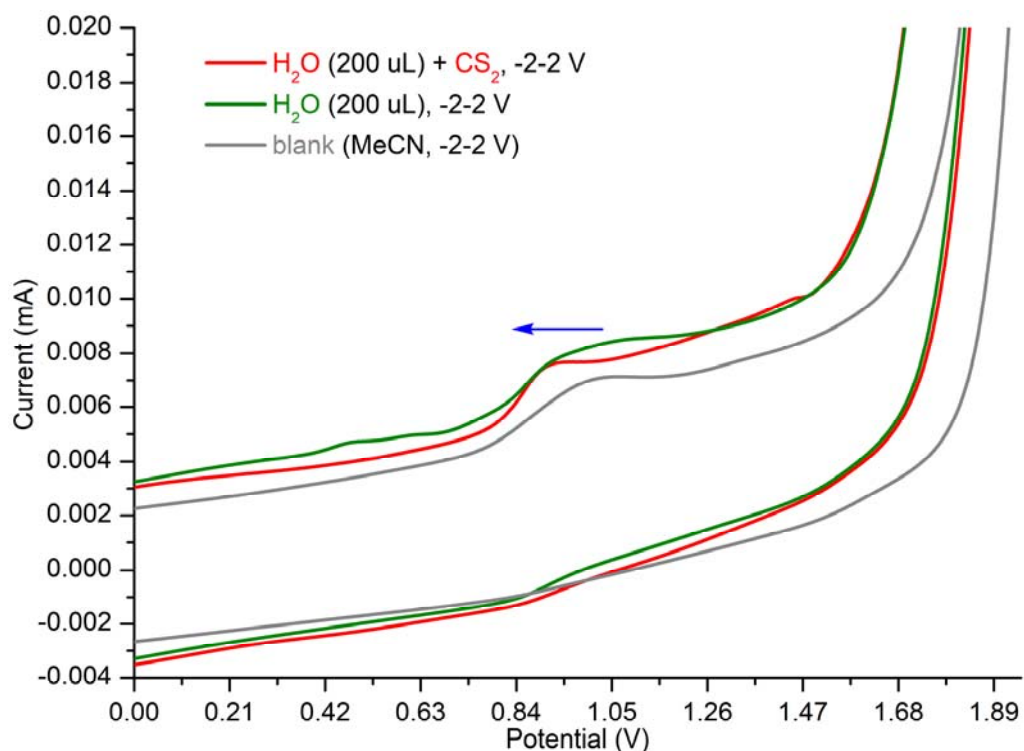

**Figure S13** Cyclic voltammograms of H<sub>2</sub>O (200 uL) in CH<sub>3</sub>CN in the presence or absence of CS<sub>2</sub> (10<sup>-3</sup> M) with GC as the working electrode, Pt wire as the counter electrode, Ag/AgCl (KCl) as the reference in 0.1 M *n*Bu<sub>4</sub>NBF<sub>4</sub>

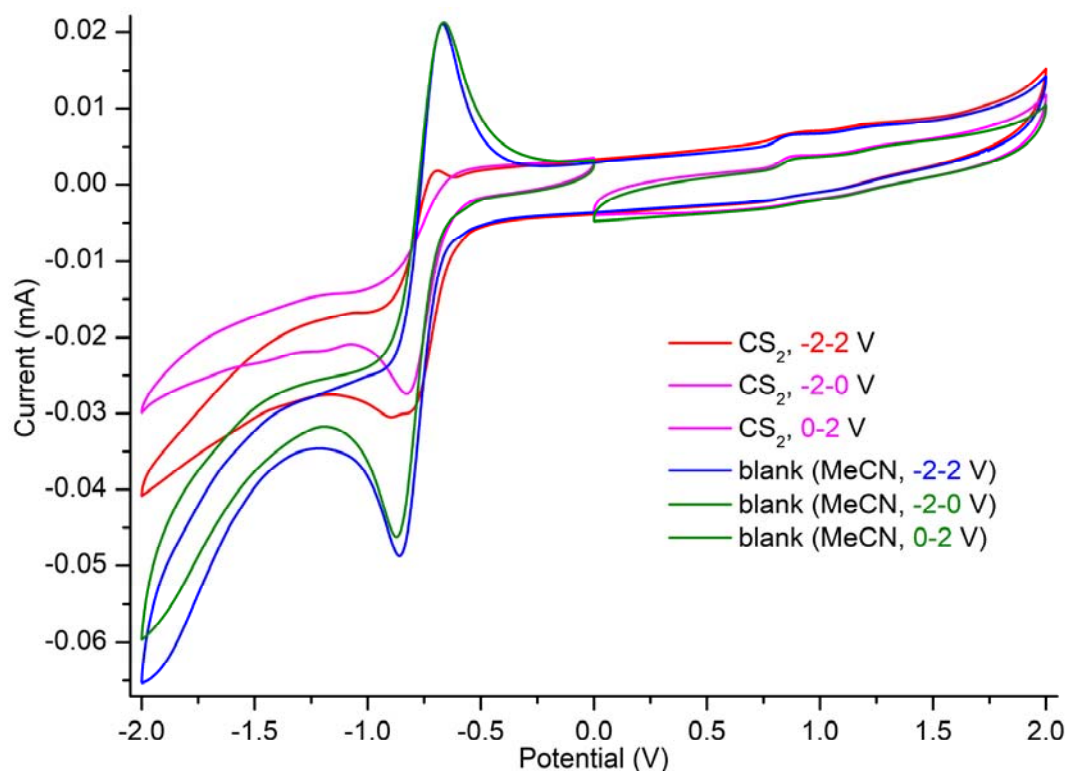

**Figure S14** Cyclic voltammograms of CS<sub>2</sub> (10<sup>-3</sup> M) in CH<sub>3</sub>CN with GC as the working electrode, Pt wire as the counter electrode, Ag/AgCl (KCl) as the reference in 0.1 M *n*Bu<sub>4</sub>NBF<sub>4</sub>

In the presence of the ligand dppb, the CV tests of CuBr<sub>2</sub> showed no obvious redox wave in aqueous CH<sub>3</sub>CN in the region of -1.60–1.85 V vs. Ag/AgCl (Figure S15).

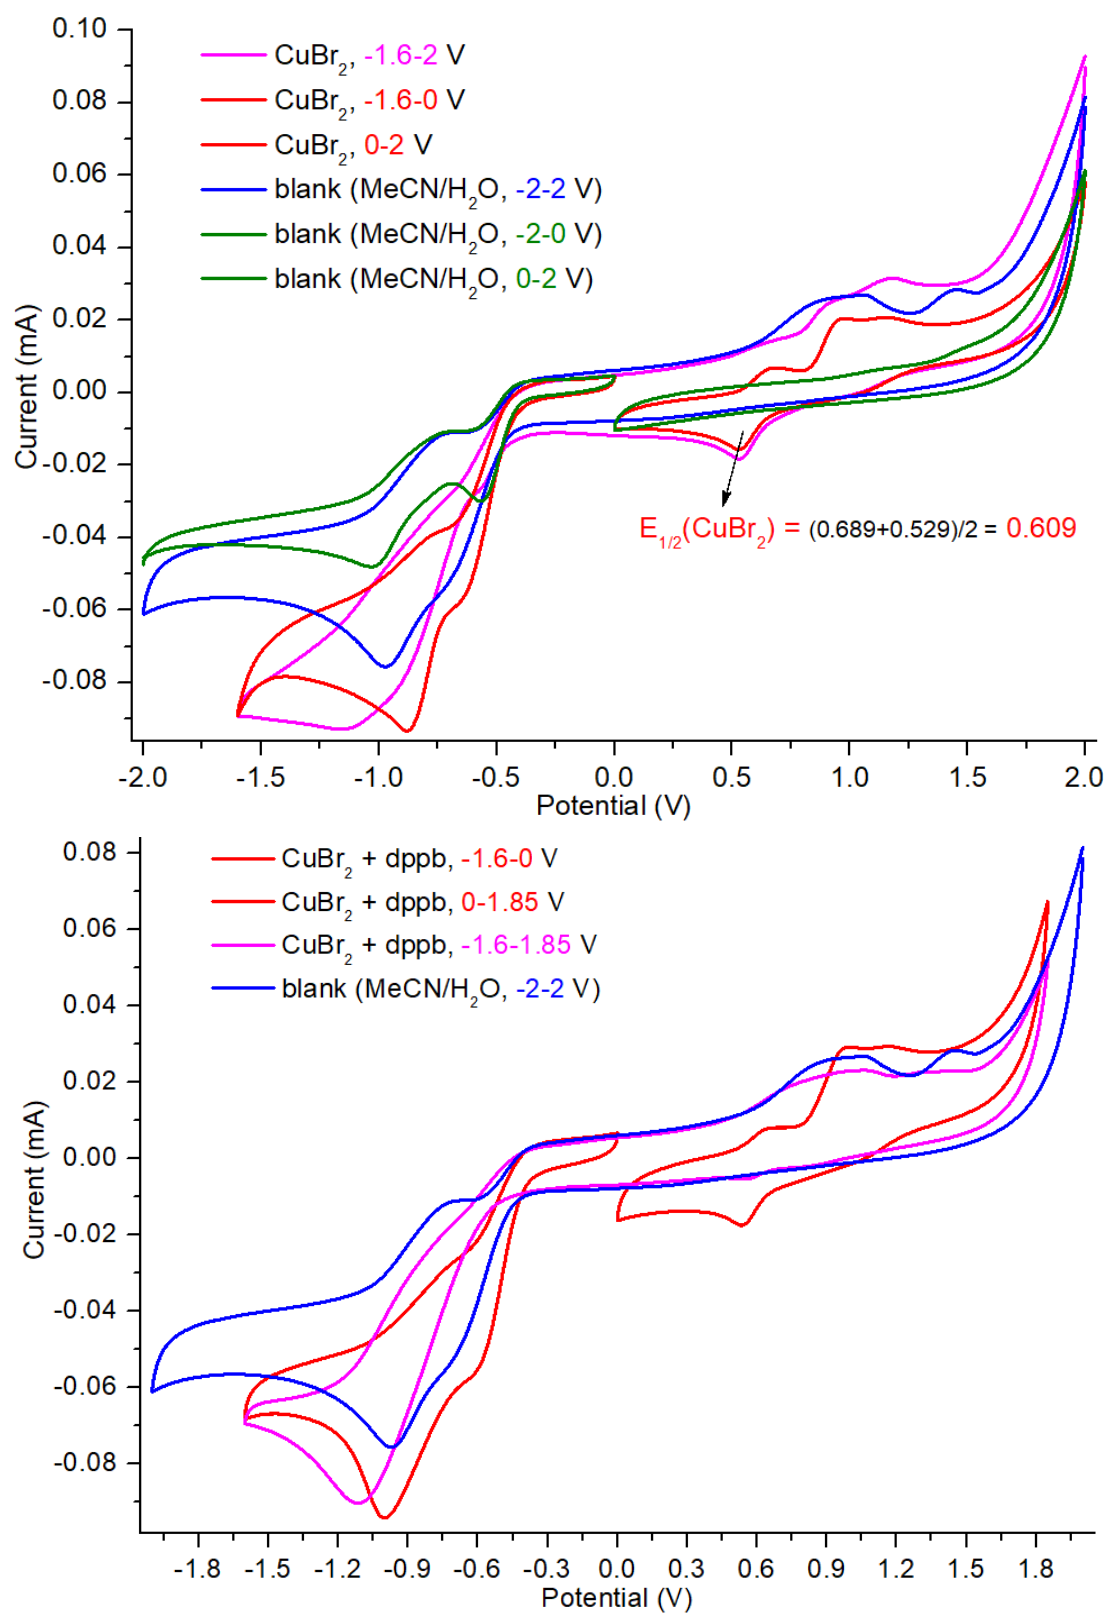

**Figure S15** Cyclic voltammograms of CuBr<sub>2</sub> (10<sup>-3</sup> M in CH<sub>3</sub>CN/H<sub>2</sub>O (6:1, v/v)) in the presence or absence of dppb (10<sup>-3</sup> M) with GC as the working electrode, Pt wire as the counter electrode, Ag/AgCl (KCl) as the reference in 0.1 M *n*Bu<sub>4</sub>NBF<sub>4</sub>

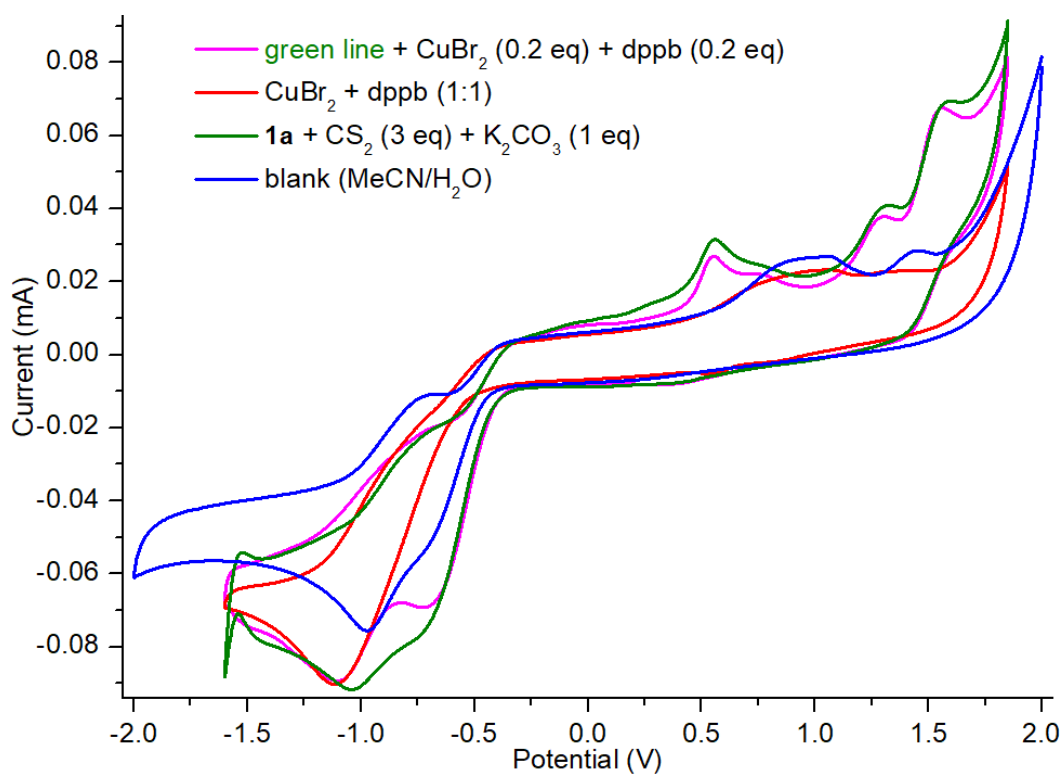

**Figure S16** Key cyclic voltammograms of reaction mixtures ( $10^{-3}$  M) with GC as the working electrode, Pt wire as the counter electrode, Ag/AgCl (KCl) as the reference in 0.1 M  $n\text{Bu}_4\text{NBF}_4$

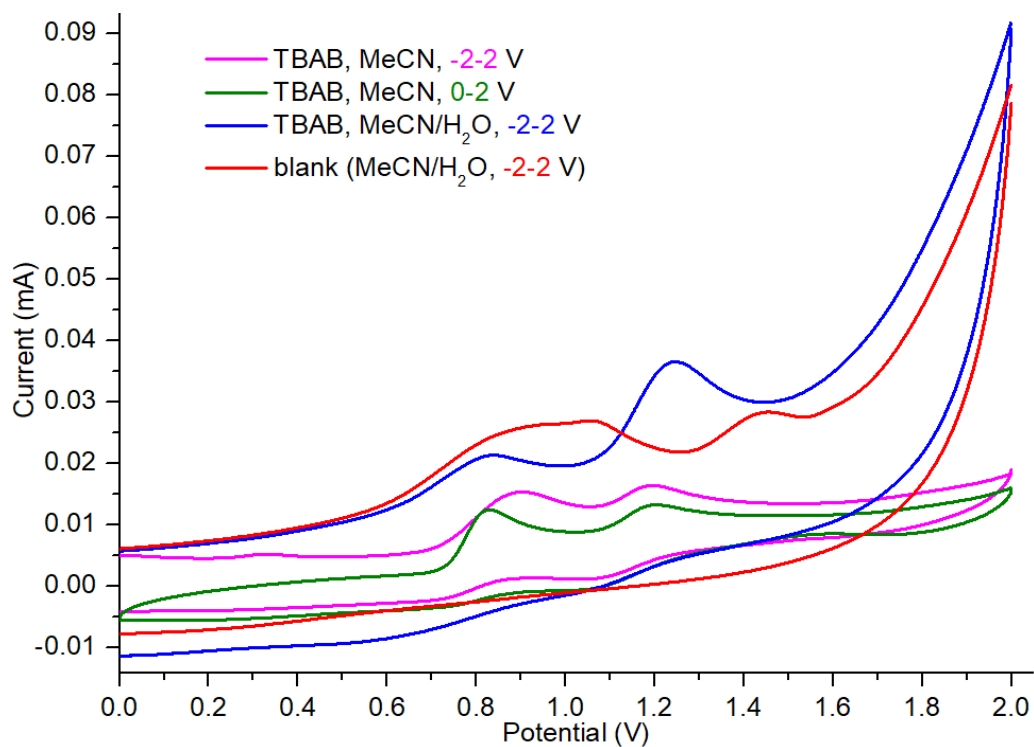

**Figure S17** Key cyclic voltammograms of TBAB ( $10^{-3}$  M) with GC as the working electrode, Pt wire as the counter electrode, Ag/AgCl (KCl) as the reference in 0.1 M  $n\text{Bu}_4\text{NBF}_4$

## V. Spectral data of products

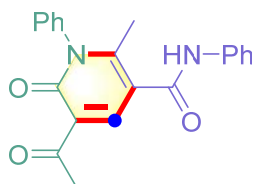

**2a**, 5-acetyl-2-methyl-6-oxo-*N*,1-diphenyl-1,6-dihydropyridine-3-carboxamide, pale yellow solid: mp 249–250 °C.  $^1\text{H}$  NMR (400 MHz,  $\text{DMSO-}d_6$ )  $\delta$  10.45 (s, 1H, NH), 8.27 (s, 1H, ArH), 7.68 (d,  $J = 7.5$  Hz, 2H, ArH), 7.61 (dd,  $J = 8.3, 6.6$  Hz, 2H, ArH), 7.54 (dddd,  $J = 7.4, 7.4, 2.6, 2.2$  Hz, 1H, ArH), 7.37 – 7.33 (m, 4H, ArH), 7.11 (dd,  $J = 7.2, 7.2$  Hz, 1H, ArH), 2.54 (s, 3H,  $\text{CH}_3$ ), 2.15 (s, 3H,  $\text{CH}_3$ ).  $^{13}\text{C}\{^1\text{H}\}$  NMR (100 MHz,  $\text{DMSO-}d_6$ )  $\delta$  196.3 (MeCO), 165.1 (NCO), 161.2 (NCO), 155.3 (ArC), 142.7 (ArC), 139.4 (ArC), 138.7 (ArC), 130.3 (ArC), 129.5 (ArC), 129.2 (ArC), 128.4 (ArC), 124.3 (ArC), 123.4 (ArC), 120.3 (ArC), 115.7 (ArC), 31.1 ( $\text{CH}_3$ ), 20.5 ( $\text{CH}_3$ ). HRMS (ESI-TOF) Calcd for  $\text{C}_{21}\text{H}_{19}\text{N}_2\text{O}_3^+$  ( $[\text{M}+\text{H}]^+$ ) 347.1390. Found 347.1399.

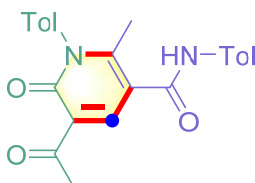

**2b1**, 5-acetyl-2-methyl-6-oxo-*N*,1-di-*p*-tolyl-1,6-dihydropyridine-3-carboxamide, pale yellow crystal: mp 292–293 °C.  $^1\text{H}$  NMR (400 MHz,  $\text{DMSO-}d_6$ )  $\delta$  10.34 (s, 1H, NH), 8.23 (s, 1H, ArH), 7.55 (d,  $J = 8.4$  Hz, 2H, ArH), 7.40 (d,  $J = 8.1$  Hz, 2H, ArH), 7.19 (d,  $J = 8.3$  Hz, 2H, ArH), 7.15 (d,  $J = 8.3$  Hz, 2H, ArH), 2.53 (s, 3H,  $\text{CH}_3$ ), 2.40 (s, 3H,  $\text{CH}_3$ ), 2.27 (s, 3H,  $\text{CH}_3$ ), 2.14 (s, 3H,  $\text{CH}_3$ ).  $^{13}\text{C}\{^1\text{H}\}$  NMR (100 MHz,  $\text{DMSO-}d_6$ )  $\delta$  196.4 (MeCO), 165.0 (NCO), 161.3 (NCO), 155.4 (ArC), 142.5 (ArC), 139.0 (ArC), 136.8 (ArC), 136.1 (ArC), 133.3 (ArC), 130.7 (ArC), 129.6 (ArC), 128.0 (ArC), 123.3 (ArC), 120.3 (ArC), 115.8 (ArC), 31.1 ( $\text{CH}_3$ ), 21.2 ( $\text{CH}_3$ ), 21.0 ( $\text{CH}_3$ ), 20.5 ( $\text{CH}_3$ ). HRMS (ESI-TOF) Calcd for  $\text{C}_{23}\text{H}_{23}\text{N}_2\text{O}_3^+$  ( $[\text{M}+\text{H}]^+$ ) 375.1703. Found 375.1701.

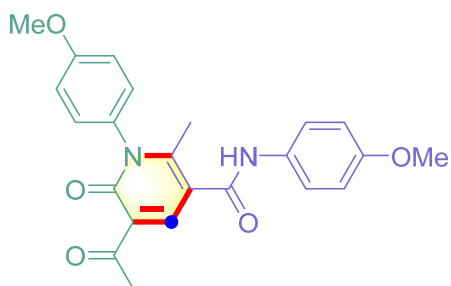

**2b2**, 5-acetyl-*N*,1-bis(4-methoxyphenyl)-2-methyl-6-oxo-1,6-dihydropyridine-3-carboxamide, yellow solid: mp 250–251 °C.  $^1\text{H}$  NMR (400 MHz,  $\text{DMSO-}d_6$ )  $\delta$  10.28 (s, 1H, NH), 8.23 (s, 1H, ArH), 7.58 (d,  $J = 9.0$  Hz, 2H, ArH), 7.24 (ddd,  $J = 8.9, 3.2, 2.3$  Hz, 2H, ArH), 7.12 (ddd,  $J = 8.9, 3.3, 2.2$  Hz, 2H, ArH), 6.92 (ddd,  $J = 9.0, 3.5, 2.2$  Hz, 2H, ArH), 3.84 (s, 3H,  $\text{OCH}_3$ ), 3.74 (s, 3H,  $\text{OCH}_3$ ), 2.53 (s, 3H,  $\text{CH}_3$ ), 2.16 (s, 3H,  $\text{CH}_3$ ).  $^{13}\text{C}\{^1\text{H}\}$  NMR (100 MHz,  $\text{DMSO-}d_6$ )  $\delta$  196.5 (MeCO), 164.8 (NCO), 161.4 (NCO), 159.8 (ArC), 156.1 (ArC), 155.7 (ArC), 142.5 (ArC), 132.5 (ArC), 131.2 (ArC), 129.4 (ArC), 123.3 (ArC), 121.9 (ArC), 115.7 (ArC), 115.3 (ArC), 114.3 (ArC), 55.9 ( $\text{OCH}_3$ ), 55.7 ( $\text{OCH}_3$ ), 31.1 ( $\text{CH}_3$ ), 20.5 ( $\text{CH}_3$ ). HRMS (ESI-TOF) Calcd for  $\text{C}_{23}\text{H}_{23}\text{N}_2\text{O}_5^+$  ( $[\text{M}+\text{H}]^+$ ) 407.1601. Found 407.1589.

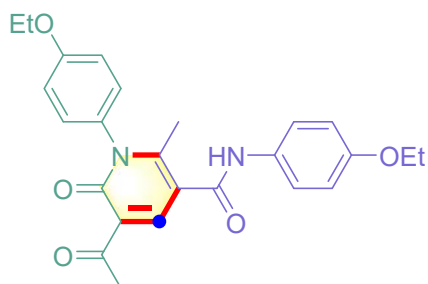

**2b3**, 5-acetyl-*N*,1-bis(4-ethoxyphenyl)-2-methyl-6-oxo-1,6-dihydropyridine-3-carboxamide, brown solid: mp 243–244 °C.  $^1\text{H}$  NMR (400 MHz,  $\text{DMSO-}d_6$ )  $\delta$  10.27 (s, 1H, NH), 8.22 (s, 1H, ArH), 7.57 (d,  $J = 9.0$  Hz, 2H, ArH), 7.22 (ddd,  $J = 8.9, 3.2, 2.3$  Hz, 2H, ArH), 7.10 (ddd,  $J = 8.9, 3.3, 2.3$  Hz, 2H, ArH), 6.90 (ddd,  $J = 9.1, 3.5, 2.3$  Hz, 2H, ArH), 4.10 (q,  $J = 7.0$  Hz, 2H,  $\text{OCH}_2$ ), 3.99 (q,  $J = 6.9$  Hz, 2H,  $\text{OCH}_2$ ), 2.53 (s, 3H,  $\text{CH}_3$ ), 2.15 (s, 3H,  $\text{CH}_3$ ), 1.37 (t,  $J = 7.0$  Hz, 3H,  $\text{CH}_2\text{CH}_3$ ), 1.31 (t,  $J = 7.0$  Hz, 3H,  $\text{CH}_2\text{CH}_3$ ).  $^{13}\text{C}\{^1\text{H}\}$  NMR (100 MHz,  $\text{DMSO-}d_6$ )  $\delta$  196.5 (MeCO), 164.8 (NCO), 161.4 (NCO), 159.0 (ArC), 155.7 (ArC), 155.3 (ArC), 142.5 (ArC), 132.4 (ArC), 131.1 (ArC), 129.4 (ArC), 123.2 (ArC), 121.9 (ArC), 115.7 (ArC), 114.8 (ArC), 63.9 ( $\text{OCH}_2$ ), 63.6 ( $\text{OCH}_2$ ), 31.1 ( $\text{CH}_3$ ), 20.5 ( $\text{CH}_3$ ), 15.15 ( $\text{CH}_3$ ), 15.09 ( $\text{CH}_3$ ). IR (KBr):  $\nu = 2972, 2933, 1682, 1647, 1603, 1511, 1475, 1247, 1174, 1116, 1045$ . HRMS (ESI-TOF) Calcd for  $\text{C}_{25}\text{H}_{27}\text{N}_2\text{O}_5^+$  ( $[\text{M}+\text{H}]^+$ ) 435.1914. Found 435.1914.

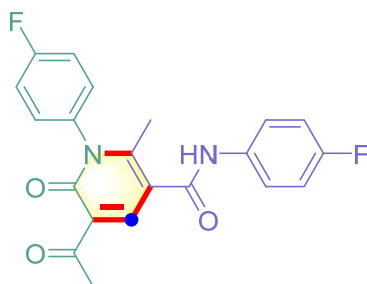

**2b4**, 5-acetyl-*N*,1-bis(4-fluorophenyl)-2-methyl-6-oxo-1,6-dihydropyridine-3-carboxamide, brown solid: mp 222–223 °C.  $^1\text{H}$  NMR (400 MHz, Pyridine-*d*<sub>5</sub>)  $\delta$  11.61 (s, 1H, NH), 8.74 (s, 1H, ArH), 8.03 (dd,  $J$  = 8.9, 4.9 Hz, 2H, ArH), 7.29 (dd,  $J$  = 8.6, 8.6 Hz, 2H, ArH), 7.22 (dd,  $J$  = 9.7, 6.9 Hz, 4H, ArH), 2.68 (s, 3H, CH<sub>3</sub>), 2.31 (s, 3H, CH<sub>3</sub>).  $^{13}\text{C}\{^1\text{H}\}$  NMR (100 MHz, Pyridine-*d*<sub>5</sub>)  $\delta$  195.7 (MeCO), 165.4 (NCO), 162.6 (d,  $J$  = 248.0 Hz, ArC), 161.4 (NCO), 159.3 (d,  $J$  = 241.8 Hz, ArC), 155.2 (ArC), 142.8 (ArC), 136.2 (d,  $J$  = 2.7 Hz, ArC), 134.8 (d,  $J$  = 3.2 Hz, ArC), 130.1 (d,  $J$  = 8.8 Hz, ArC), 122.3 (d,  $J$  = 7.7 Hz, ArC), 116.9 (d,  $J$  = 23.1 Hz, ArC), 115.9 (ArC), 115.6 (d,  $J$  = 22.3 Hz, ArC), 30.9 (CH<sub>3</sub>), 20.0 (CH<sub>3</sub>).  $^{19}\text{F}$  NMR (376 MHz, Pyridine-*d*<sub>5</sub>)  $\delta$  -112.18 – -112.25 (m, 1F), -118.32 (dt,  $J$  = 8.5, 5.0 Hz, 1F). HRMS (ESI-TOF) Calcd for C<sub>21</sub>H<sub>17</sub>F<sub>2</sub>N<sub>2</sub>O<sub>3</sub><sup>+</sup> ([M+H]<sup>+</sup>) 383.1202. Found 383.1205.

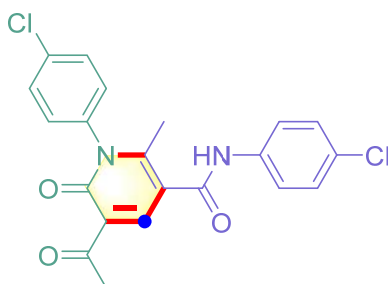

**2b5**, 5-acetyl-*N*,1-bis(4-chlorophenyl)-2-methyl-6-oxo-1,6-dihydropyridine-3-carboxamide, yellowish solid: mp 196–197 °C (dec.).  $^1\text{H}$  NMR (400 MHz, Pyridine-*d*<sub>5</sub>)  $\delta$  11.69 (s, 1H, NH), 8.72 (s, 1H, ArH), 8.02 (d,  $J$  = 8.8 Hz, 2H, ArH), 7.53 (d,  $J$  = 8.9 Hz, 2H, ArH), 7.46 (d,  $J$  = 8.7 Hz, 2H, ArH), 7.15 (d,  $J$  = 8.6 Hz, 2H, ArH), 2.67 (s, 3H, CH<sub>3</sub>), 2.30 (s, 3H, CH<sub>3</sub>).  $^{13}\text{C}\{^1\text{H}\}$  NMR (100 MHz, Pyridine-*d*<sub>5</sub>)  $\delta$  195.6 (MeCO), 165.5 (NCO), 161.2 (NCO), 155.0 (ArC), 142.9 (ArC), 138.8 (ArC), 137.4 (ArC), 134.8 (ArC), 130.2 (ArC), 129.7 (ArC), 129.1 (ArC), 128.7 (ArC), 121.9 (ArC), 115.8 (ArC), 30.9 (CH<sub>3</sub>), 20.0 (CH<sub>3</sub>). HRMS (ESI-TOF) Calcd for C<sub>21</sub>H<sub>17</sub>Cl<sub>2</sub>N<sub>2</sub>O<sub>3</sub><sup>+</sup> ([M+H]<sup>+</sup>) 415.0611. Found 415.0610.

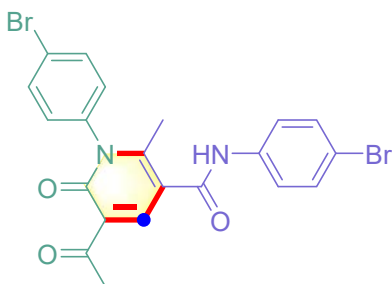

**2b6**, 5-acetyl-*N*,1-bis(4-bromophenyl)-2-methyl-6-oxo-1,6-dihydropyridine-3-carboxamide, brown solid: mp 267–268 °C.  $^1\text{H}$  NMR (400 MHz,  $\text{DMSO-}d_6$ )  $\delta$  10.55 (s, 1H), 8.27 (s, 1H), 7.80 (ddd,  $J = 8.6, 2.9, 2.0$  Hz, 2H), 7.65 (ddd,  $J = 8.9, 2.9, 2.0$  Hz, 2H), 7.54 (ddd,  $J = 8.9, 2.9, 2.0$  Hz, 2H), 7.34 (d,  $J = 8.7, 2.9, 2.0$  Hz, 2H), 2.53 (s, 3H), 2.16 (s, 3H).  $^{13}\text{C}\{^1\text{H}\}$  NMR (100 MHz,  $\text{DMSO-}d_6$ )  $\delta$  196.2, 165.1, 161.1, 155.5, 142.7, 138.7, 138.0, 133.3, 132.0, 130.8, 123.4, 122.7, 122.3, 116.0, 115.4, 31.1, 20.5. HRMS (ESI-TOF) Calcd for  $\text{C}_{21}\text{H}_{17}\text{Br}_2\text{N}_2\text{O}_3^+$  ( $[\text{M}+\text{H}]^+$ ) 502.9600. Found 502.9604.

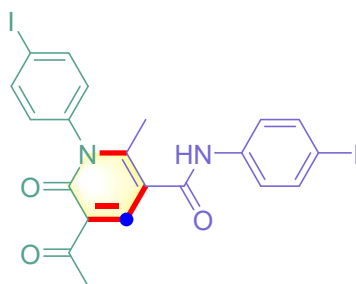

**2b7**, 5-acetyl-*N*,1-bis(4-iodophenyl)-2-methyl-6-oxo-1,6-dihydropyridine-3-carboxamide, yellowish solid: mp 285–286 °C.  $^1\text{H}$  NMR (400 MHz, Pyridine- $d_5$ )  $\delta$  11.68 (s, 1H), 8.72 (s, 1H), 7.90 (d,  $J = 8.2$  Hz, 2H), 7.86 (d,  $J = 8.7$  Hz, 2H), 7.80 (d,  $J = 8.7$  Hz, 2H), 6.93 (d,  $J = 8.2$  Hz, 2H), 2.67 (s, 3H), 2.28 (s, 3H).  $^{13}\text{C}\{^1\text{H}\}$  NMR (100 MHz, Pyridine- $d_5$ )  $\delta$  195.6, 165.5, 161.1, 154.9, 142.8, 139.8, 139.2, 138.5, 138.0, 130.0, 122.5, 115.8, 95.9, 87.9, 30.9, 20.0. HRMS (ESI-TOF) Calcd for  $\text{C}_{21}\text{H}_{17}\text{I}_2\text{N}_2\text{O}_3^+$  ( $[\text{M}+\text{H}]^+$ ) 598.9323. Found 598.9325.

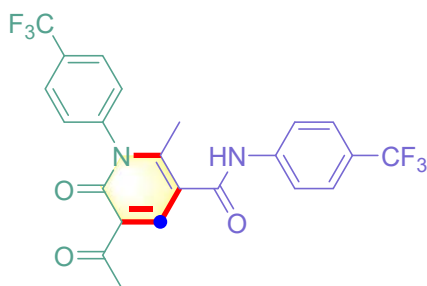

**2b8**, 5-acetyl-2-methyl-6-oxo-*N*,1-bis(4-(trifluoromethyl)phenyl)-1,6-dihydropyridine-3-carboxamide, yellow solid: mp 233–234 °C.  $^1\text{H}$  NMR (400 MHz,  $\text{DMSO-}d_6$ )  $\delta$  10.79 (s, 1H), 8.34 (s, 1H), 8.00 (d,  $J = 8.3$  Hz, 2H), 7.91 (d,  $J = 8.5$  Hz, 2H), 7.73 (d,  $J = 8.6$  Hz, 2H),



7.65 (d,  $J = 8.2$  Hz, 2H), 2.54 (s, 3H), 2.18 (s, 3H).  $^{13}\text{C}\{^1\text{H}\}$  NMR (100 MHz, DMSO- $d_6$ )  $\delta$  196.1, 165.4, 161.1, 155.5, 143.0 (d,  $J = 0.9$  Hz), 142.9, 142.3 (d,  $J = 1.3$  Hz), 130.1 (q,  $J = 32.1$  Hz), 129.8, 127.4 (q,  $J = 3.9$  Hz), 126.5 (q,  $J = 4.0$  Hz), 124.8 (q,  $J = 269.8$  Hz), 124.34 (d,  $J = 272.4$  Hz), 124.29 (q,  $J = 32.0$  Hz), 123.5, 120.3, 115.3, 31.0, 20.5.  $^{19}\text{F}$  NMR (376 MHz, DMSO- $d_6$ )  $\delta$  -60.38 (s, 1F), -61.13 (s, 1F). HRMS (ESI-TOF) Calcd for  $\text{C}_{23}\text{H}_{17}\text{F}_6\text{N}_2\text{O}_3^+$  ( $[\text{M}+\text{H}]^+$ ) 483.1138. Found 483.1135.

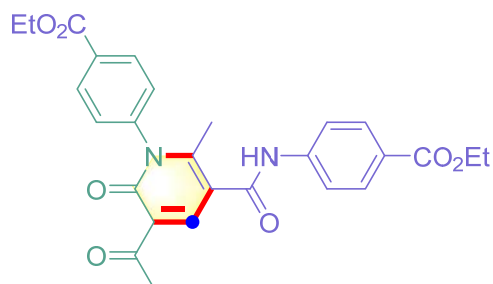

**2b9**, ethyl 4-(5-acetyl-1-(4-(ethoxycarbonyl)phenyl)-2-methyl-6-oxo-1,6-dihydropyridine-3-carboxamido)benzoate, yellow solid: mp 227–228 °C.  $^1\text{H}$  NMR (400 MHz, DMSO- $d_6$ )  $\delta$  10.79 (s, 1H), 8.32 (s, 1H), 8.17 (d,  $J = 8.2$  Hz, 2H), 7.97 (d,  $J = 8.4$  Hz, 2H), 7.84 (d,  $J = 8.4$  Hz, 2H), 7.54 (d,  $J = 8.1$  Hz, 2H), 4.38 (q,  $J = 7.1$  Hz, 2H), 4.30 (q,  $J = 7.1$  Hz, 2H), 2.54 (s, 3H), 2.16 (s, 3H), 1.36 (t,  $J = 7.1$  Hz, 3H), 1.32 (t,  $J = 7.1$  Hz, 3H).  $^{13}\text{C}\{^1\text{H}\}$  NMR (100 MHz, DMSO- $d_6$ )  $\delta$  196.1, 165.8, 165.5, 165.4, 161.0, 155.4, 143.8, 142.9, 142.8, 131.1, 131.0, 130.7, 129.1, 125.2, 123.4, 119.7, 115.4, 61.6, 61.0, 31.1, 20.5, 14.7, 14.6. HRMS (ESI-TOF) Calcd for  $\text{C}_{27}\text{H}_{27}\text{N}_2\text{O}_7^+$  ( $[\text{M}+\text{H}]^+$ ) 491.1813. Found 491.1814.

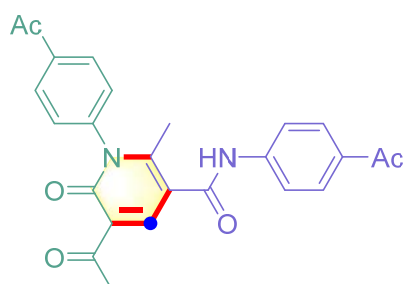

**2b10**, 5-acetyl-*N*,1-bis(4-acetylphenyl)-2-methyl-6-oxo-1,6-dihydropyridine-3-carboxamide, yellowish solid: mp 224–225 °C (dec.).  $^1\text{H}$  NMR (400 MHz, DMSO- $d_6$ )  $\delta$  10.76 (s, 1H), 8.32 (s, 1H), 8.17 (ddd,  $J = 8.5, 2.3, 2.0$  Hz, 2H), 7.98 (ddd,  $J = 8.8, 2.3, 2.0$  Hz, 2H), 7.83 (ddd,  $J = 8.8$  Hz, 2H), 7.54 (ddd,  $J = 8.5, 2.3, 2.0$  Hz, 2H), 2.67 (s, 3H), 2.55 (s, 3H), 2.54 (s, 3H), 2.17 (s, 3H).  $^{13}\text{C}\{^1\text{H}\}$  NMR (100 MHz, DMSO- $d_6$ )  $\delta$  197.8, 197.0, 196.2, 165.4, 161.1, 155.4, 143.7, 142.9, 142.7, 137.6, 132.7, 130.2, 129.9, 129.0, 123.4, 119.6, 115.3, 31.1, 27.4, 27.0, 20.5. HRMS (ESI-TOF) Calcd for

$C_{25}H_{23}N_2O_5^+$  ( $[M+H]^+$ ) 431.1601. Found 431.1600.

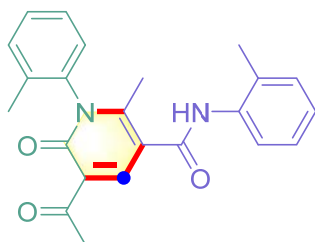

**2c1**, 5-acetyl-2-methyl-6-oxo-*N*,1-di-*o*-tolyl-1,6-dihydropyridine-3-carboxamide, yellow solid: mp 201–202 °C.  $^1H$  NMR (400 MHz, DMSO- $d_6$ )  $\delta$  9.99 (s, 1H), 8.34 (s, 1H), 7.49 – 7.37 (m, 4H), 7.28 – 7.14 (m, 4H), 2.55 (s, 3H), 2.25 (s, 3H), 2.15 (s, 3H), 2.04 (s, 3H).  $^{13}C\{^1H\}$  NMR (100 MHz, DMSO- $d_6$ )  $\delta$  196.5, 165.3, 160.6, 154.9, 142.9, 137.9, 136.4, 135.0, 133.5, 131.7, 130.9, 129.8, 128.2, 128.0, 126.54, 126.48, 123.5, 115.7, 31.1, 19.8, 18.5, 17.3. HRMS (ESI-TOF) Calcd for  $C_{23}H_{23}N_2O_3^+$  ( $[M+H]^+$ ) 375.1703. Found 375.1703.

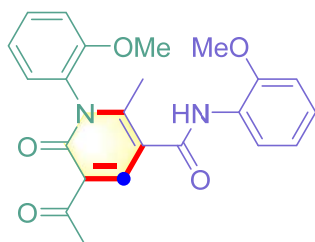

**2c2**, 5-acetyl-*N*,1-bis(2-methoxyphenyl)-2-methyl-6-oxo-1,6-dihydropyridine-3-carboxamide, yellow solid: mp 171–172 °C.  $^1H$  NMR (400 MHz, DMSO- $d_6$ )  $\delta$  9.71 (s, 1H), 8.25 (s, 1H), 7.69 (d,  $J = 7.9$  Hz, 1H), 7.52 (ddd,  $J = 8.3, 7.4, 1.7$  Hz, 1H), 7.27 (ddd,  $J = 7.7, 6.5, 1.4$  Hz, 2H), 7.20 – 7.12 (m, 2H), 7.08 (dd,  $J = 8.3, 1.4$  Hz, 1H), 6.95 (ddd,  $J = 7.6, 7.6, 1.4$  Hz, 1H), 3.81 (s, 3H), 3.79 (s, 3H), 2.52 (s, 3H), 2.13 (s, 3H).  $^{13}C\{^1H\}$  NMR (100 MHz, DMSO- $d_6$ )  $\delta$  196.3, 165.4, 160.7, 155.7, 154.2, 152.2, 143.1, 131.2, 129.4, 127.0, 126.9, 126.5, 125.1, 123.1, 121.7, 120.6, 115.6, 113.1, 112.0, 56.3, 56.1, 31.1, 19.5. HRMS (ESI-TOF) Calcd for  $C_{23}H_{23}N_2O_5^+$  ( $[M+H]^+$ ) 407.1601. Found 407.1599.

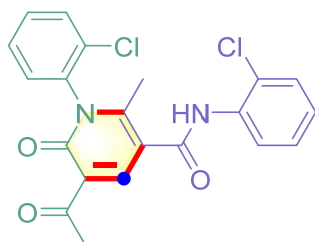

**2c3**, 5-acetyl-*N*,1-bis(2-chlorophenyl)-2-methyl-6-oxo-1,6-dihydropyridine-3-carboxamide,

yellow solid: mp 181–182 °C.  $^1\text{H}$  NMR (400 MHz,  $\text{DMSO-}d_6$ )  $\delta$  10.31 (s, 1H), 8.41 (s, 1H), 7.80 – 7.75 (m, 1H), 7.62 – 7.57 (m, 4H), 7.56 (dd,  $J = 8.0, 1.6$  Hz, 1H), 7.39 (ddd,  $J = 7.6, 7.6, 1.5$  Hz, 1H), 7.30 (ddd,  $J = 7.7, 7.7, 1.7$  Hz, 1H), 2.55 (s, 3H), 2.20 (s, 3H).  $^{13}\text{C}\{^1\text{H}\}$  NMR (100 MHz,  $\text{DMSO-}d_6$ )  $\delta$  196.1, 165.3, 160.4, 155.4, 143.4, 136.1, 135.1, 131.7, 131.2, 130.8, 130.6, 130.1, 129.7, 129.4, 128.8, 128.1, 128.0, 123.6, 115.1, 31.0, 19.6. HRMS (ESI-TOF) Calcd for  $\text{C}_{21}\text{H}_{17}\text{Cl}_2\text{N}_2\text{O}_3^+$  ( $[\text{M}+\text{H}]^+$ ) 415.0611. Found 415.0612.

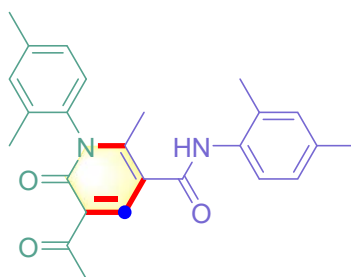

**2d1**, 5-acetyl-*N*,1-bis(2,4-dimethylphenyl)-2-methyl-6-oxo-1,6-dihydropyridine-3-carboxamide, yellow solid: mp 181–182 °C.  $^1\text{H}$  NMR (400 MHz, Pyridine- $d_5$ )  $\delta$  11.11 (s, 1H), 8.95 (s, 1H), 7.75 (d,  $J = 8.0$  Hz, 1H), 7.10 (dd,  $J = 8.0, 1.9$  Hz, 2H), 7.05 (d,  $J = 11.2$  Hz, 2H), 6.98 (d,  $J = 7.9$  Hz, 1H), 2.75 (s, 3H), 2.42 (s, 3H), 2.39 (s, 3H), 2.21 (s, 6H), 1.92 (s, 3H).  $^{13}\text{C}\{^1\text{H}\}$  NMR (100 MHz, Pyridine- $d_5$ )  $\delta$  196.1, 165.9, 161.0, 155.4, 143.0, 139.2, 135.7, 135.5, 134.6, 134.5, 133.2, 132.1, 131.5, 128.3, 127.4, 127.1, 126.2, 116.0, 31.0, 20.7, 20.6, 19.4, 18.3, 16.8. HRMS (ESI-TOF) Calcd for  $\text{C}_{25}\text{H}_{27}\text{N}_2\text{O}_3^+$  ( $[\text{M}+\text{H}]^+$ ) 403.2016. Found 403.2014.

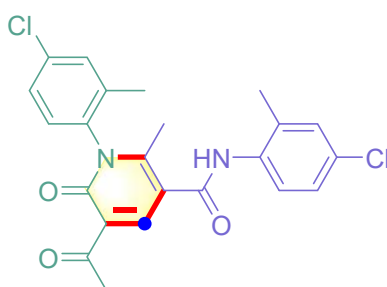

**2d2**, 5-acetyl-*N*,1-bis(4-chloro-2-methylphenyl)-2-methyl-6-oxo-1,6-dihydropyridine-3-carboxamide, yellow solid: mp 253–254 °C.  $^1\text{H}$  NMR (400 MHz,  $\text{DMSO-}d_6$ )  $\delta$  10.03 (s, 1H), 8.35 (s, 1H), 7.61 (d,  $J = 2.3$  Hz, 1H), 7.49 (dd,  $J = 8.4, 2.4$  Hz, 1H), 7.43 (d,  $J = 8.5$  Hz, 1H), 7.37 (d,  $J = 2.5$  Hz, 1H), 7.34 (d,  $J = 8.4$  Hz, 1H), 7.27 (dd,  $J = 8.5, 2.5$  Hz, 1H), 2.54 (s, 3H), 2.25 (s, 3H), 2.16 (s, 3H), 2.03 (s, 3H).  $^{13}\text{C}\{^1\text{H}\}$  NMR (100 MHz,  $\text{DMSO-}d_6$ )  $\delta$  196.3, 165.3, 160.5, 155.1, 143.1, 137.7, 136.8, 135.8, 135.5, 134.0, 131.4, 130.4, 130.3, 130.2, 128.04, 128.95, 126.4, 123.5, 115.5, 31.1, 19.9, 18.3, 17.2.

HRMS (ESI-TOF) Calcd for  $C_{23}H_{21}Cl_2N_2O_3^+$  ( $[M+H]^+$ ) 443.0924. Found 443.0935.

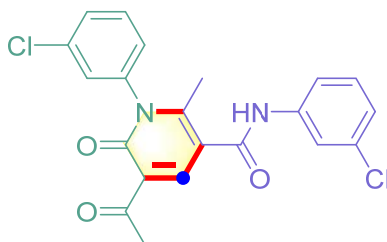

**2e**, 5-acetyl-*N*,1-bis(3-chlorophenyl)-2-methyl-6-oxo-1,6-dihydropyridine-3-carboxamide, yellow solid: mp 231–232 °C (dec.).  $^1H$  NMR (400 MHz,  $DMSO-d_6$ )  $\delta$  10.62 (s, 1H), 8.31 (s, 1H), 7.90 (dd,  $J = 2.1, 2.1$  Hz, 1H), 7.66 – 7.56 (m, 4H), 7.41 – 7.36 (m, 2H), 7.18 (dd,  $J = 8.1, 2.1$  Hz, 1H), 2.54 (s, 3H), 2.19 (s, 3H).  $^{13}C\{^1H\}$  NMR (100 MHz,  $DMSO-d_6$ )  $\delta$  196.2, 165.2, 161.1, 155.7, 142.8, 140.8, 139.9, 134.4, 133.5, 131.8, 130.9, 129.7, 128.7, 127.4, 124.0, 123.4, 119.8, 118.7, 115.2, 31.1, 20.5. HRMS (ESI-TOF) Calcd for  $C_{21}H_{17}Cl_2N_2O_3^+$  ( $[M+H]^+$ ) 415.0611. Found 415.0614.

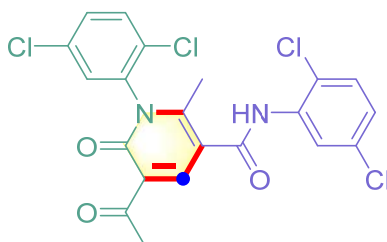

**2f**, 5-acetyl-*N*,1-bis(2,5-dichlorophenyl)-2-methyl-6-oxo-1,6-dihydropyridine-3-carboxamide, yellow solid: mp 207–208 °C.  $^1H$  NMR (400 MHz,  $DMSO-d_6$ )  $\delta$  10.40 (s, 1H), 8.44 (s, 1H), 7.86 (d,  $J = 2.5$  Hz, 1H), 7.83 – 7.80 (m, 2H), 7.70 (dd,  $J = 8.7, 2.5$  Hz, 1H), 7.60 (d,  $J = 8.6$  Hz, 1H), 7.38 (dd,  $J = 8.6, 2.6$  Hz, 1H), 2.55 (s, 3H), 2.23 (s, 3H).  $^{13}C\{^1H\}$  NMR (100 MHz,  $DMSO-d_6$ )  $\delta$  195.9, 165.2, 160.3, 155.5, 143.7, 137.2, 136.4, 133.3, 132.2, 132.0, 131.7, 131.4, 130.6, 130.4, 128.13, 128.07, 127.7, 123.6, 114.8, 31.0, 19.6. IR (KBr):  $\nu = 2980, 1685, 1646, 1602, 1517, 1441, 1320, 1207, 753$ . HRMS (ESI-TOF) Calcd for  $C_{21}H_{15}Cl_4N_2O_3^+$  ( $[M+H]^+$ ) 482.9831. Found 482.9835.

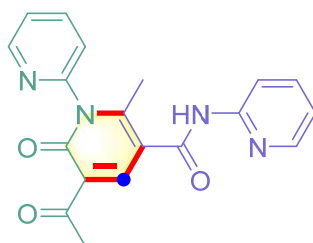

**2g**, 3-acetyl-6-methyl-2-oxo-*N*-(pyridin-2-yl)-2*H*-[1,2'-bipyridine]-5-carboxamide, yellowish solid: mp 219–220 °C.  $^1H$  NMR (400 MHz,  $DMSO-d_6$ )  $\delta$  11.12 (s, 1H),

8.71 (ddd,  $J = 4.9, 1.9, 0.9$  Hz, 1H), 8.37 (ddd,  $J = 4.9, 2.0, 0.9$  Hz, 1H), 8.31 (s, 1H), 8.16 – 8.11 (m, 2H), 7.84 (ddd,  $J = 8.4, 7.4, 2.0$  Hz, 1H), 7.63 – 7.59 (m, 2H), 7.17 (ddd,  $J = 7.4, 4.8, 1.1$  Hz, 1H), 2.53 (s, 3H), 2.12 (s, 3H).  $^{13}\text{C}\{^1\text{H}\}$  NMR (100 MHz, DMSO- $d_6$ )  $\delta$  195.9, 165.6, 161.2, 154.8, 152.5, 151.7, 150.4, 148.5, 143.8, 140.1, 138.7, 125.3, 124.2, 123.3, 120.4, 115.1, 114.7, 31.1, 19.4. HRMS (ESI-TOF) Calcd for  $\text{C}_{19}\text{H}_{17}\text{N}_4\text{O}_3^+$  ( $[\text{M}+\text{H}]^+$ ) 349.1295. Found 349.1297.

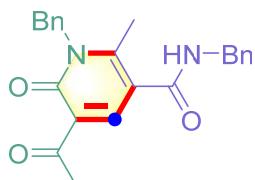

**2h**, 5-acetyl-*N*,1-dibenzyl-2-methyl-6-oxo-1,6-dihydropyridine-3-carboxamide, colorless oil.  $^1\text{H}$  NMR (400 MHz, DMSO- $d_6$ )  $\delta$  9.00 (t,  $J = 5.9$  Hz, 1H), 8.09 (s, 1H), 7.38 – 7.23 (m, 8H), 7.16 (d,  $J = 7.0$  Hz, 2H), 5.45 (s, 2H), 4.40 (d,  $J = 5.9$  Hz, 2H), 2.58 (s, 3H), 2.48 (s, 3H).  $^{13}\text{C}\{^1\text{H}\}$  NMR (100 MHz, DMSO- $d_6$ )  $\delta$  196.7, 166.7, 161.2, 155.1, 141.8, 139.6, 136.5, 129.3, 128.9, 127.81, 127.78, 127.4, 126.7, 122.8, 116.0, 47.7, 43.2, 31.2, 18.6. HRMS (ESI-TOF) Calcd for  $\text{C}_{23}\text{H}_{23}\text{N}_2\text{O}_3^+$  ( $[\text{M}+\text{H}]^+$ ) 375.1703. Found 375.1701.

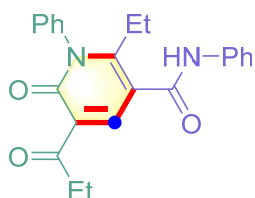

**2i1**, 2-ethyl-6-oxo-*N*,1-diphenyl-5-propionyl-1,6-dihydropyridine-3-carboxamide, yellow solid: mp 216–217 °C.  $^1\text{H}$  NMR (400 MHz, DMSO- $d_6$ )  $\delta$  10.47 (s, 1H), 8.25 (s, 1H), 7.68 (d,  $J = 7.3$  Hz, 2H), 7.62 – 7.58 (m, 2H), 7.57 – 7.52 (m, 1H), 7.39 – 7.33 (m, 4H), 7.11 (dd,  $J = 7.4, 7.4$  Hz, 1H), 2.98 (q,  $J = 7.2$  Hz, 2H), 2.57 (q,  $J = 7.4$  Hz, 2H), 1.03 (t,  $J = 7.2$  Hz, 3H), 0.96 (t,  $J = 7.4$  Hz, 3H).  $^{13}\text{C}\{^1\text{H}\}$  NMR (100 MHz, DMSO- $d_6$ )  $\delta$  199.5, 165.2, 161.1, 159.6, 142.8, 139.4, 138.1, 130.0, 129.6, 129.2, 128.8, 124.3, 123.4, 120.4, 115.1, 35.8, 25.2, 13.8, 8.7. IR (KBr):  $\nu = 2979, 2938, 1685, 1646, 1602, 1541, 1517, 1499, 1441, 1390, 1320, 1207, 753$ . HRMS (ESI-TOF) Calcd for  $\text{C}_{23}\text{H}_{23}\text{N}_2\text{O}_3^+$  ( $[\text{M}+\text{H}]^+$ ) 375.1703. Found 375.1701.

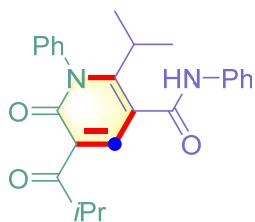

**2i2**, 5-isobutyryl-2-isopropyl-6-oxo-*N*,1-diphenyl-1,6-dihydropyridine-3-carboxamide, yellowish solid: mp 225–226 °C.  $^1\text{H}$  NMR (400 MHz,  $\text{DMSO-}d_6$ )  $\delta$  10.59 (s, 1H), 8.06 (s, 1H), 7.68 (d,  $J = 7.7$  Hz, 2H), 7.61 (dd,  $J = 8.3, 6.5$  Hz, 2H), 7.56 – 7.52 (m, 1H), 7.38 – 7.32 (m, 4H), 7.12 (ddd,  $J = 7.3, 7.3, 1.2$  Hz, 1H), 3.72 (hept,  $J = 6.6$  Hz, 1H), 2.73 (p,  $J = 7.1$  Hz, 1H), 1.18 (d,  $J = 7.1$  Hz, 6H), 1.04 (d,  $J = 6.8$  Hz, 6H).  $^{13}\text{C}\{^1\text{H}\}$  NMR (100 MHz,  $\text{DMSO-}d_6$ )  $\delta$  203.2, 166.0, 160.9, 160.8, 143.6, 139.3, 138.7, 130.2, 129.5, 129.3, 128.6, 124.4, 123.3, 120.1, 116.5, 38.1, 33.0, 20.5, 18.7. HRMS (ESI-TOF) Calcd for  $\text{C}_{25}\text{H}_{27}\text{N}_2\text{O}_3^+$  ( $[\text{M}+\text{H}]^+$ ) 403.2016. Found 403.2018.

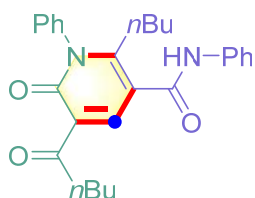

**2i3**, 2-butyl-6-oxo-5-pentanoyl-*N*,1-diphenyl-1,6-dihydropyridine-3-carboxamide, yellowish solid: mp 232–233 °C.  $^1\text{H}$  NMR (400 MHz,  $\text{DMSO-}d_6$ )  $\delta$  10.48 (s, 1H), 8.25 (s, 1H), 7.67 (d,  $J = 7.4$  Hz, 2H), 7.63 – 7.58 (m, 2H), 7.57 – 7.53 (m, 1H), 7.39 – 7.34 (m, 4H), 7.11 (dd,  $J = 7.4, 7.4$  Hz, 1H), 2.98 (t,  $J = 7.4$  Hz, 2H), 2.57 – 2.53 (m, 2H), 1.54 (p,  $J = 7.4$  Hz, 2H), 1.43 – 1.34 (m, 2H), 1.29 (h,  $J = 7.4$  Hz, 2H), 0.98 (h,  $J = 7.3$  Hz, 2H), 0.87 (t,  $J = 7.3$  Hz, 3H), 0.53 (t,  $J = 7.3$  Hz, 3H).  $^{13}\text{C}\{^1\text{H}\}$  NMR (100 MHz,  $\text{DMSO-}d_6$ )  $\delta$  199.0, 165.2, 161.1, 158.7, 142.8, 139.4, 138.1, 129.9, 129.5, 129.2, 128.9, 124.3, 123.4, 120.4, 115.4, 42.2, 31.1, 30.8, 26.2, 22.34, 22.32, 14.3, 13.4. HRMS (ESI-TOF) Calcd for  $\text{C}_{27}\text{H}_{31}\text{N}_2\text{O}_3^+$  ( $[\text{M}+\text{H}]^+$ ) 431.2329. Found 431.2325.

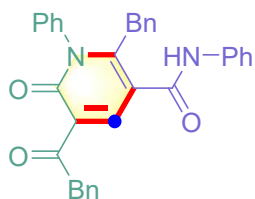

**2i4**, 2-benzyl-6-oxo-*N*,1-diphenyl-5-(2-phenylacetyl)-1,6-dihydropyridine-3-carboxamide, yellow solid: mp 193–194 °C.  $^1\text{H}$  NMR (400 MHz,  $\text{DMSO-}d_6$ )  $\delta$  10.62 (s, 1H), 8.37 (s, 1H), 7.62 (d,  $J = 7.3$  Hz, 2H), 7.46 – 7.41 (m, 1H), 7.39 – 7.28 (m, 6H), 7.25 –

7.20 (m, 3H), 7.13 – 7.07 (m, 4H), 6.96 (dd,  $J = 8.3, 1.4$  Hz, 2H), 6.73 – 6.70 (m, 2H), 4.37 (s, 2H), 4.09 (s, 2H).  $^{13}\text{C}\{^1\text{H}\}$  NMR (100 MHz, DMSO- $d_6$ )  $\delta$  196.6, 165.1, 161.3, 155.9, 143.1, 139.3, 137.7, 136.5, 135.6, 130.3, 129.5, 129.3, 129.2, 128.7, 128.64, 128.60, 128.5, 127.0, 126.9, 124.4, 124.2, 120.5, 117.1, 48.4, 37.0. HRMS (ESI-TOF) Calcd for  $\text{C}_{33}\text{H}_{27}\text{N}_2\text{O}_3^+$  ( $[\text{M}+\text{H}]^+$ ) 499.2016. Found 499.2017.

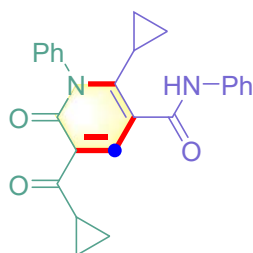

**2j1**, 5-(cyclopropanecarbonyl)-2-cyclopropyl-6-oxo-*N*,1-diphenyl-1,6-dihydropyridine-3-carboxamide, yellowish solid: mp 211–212 °C.  $^1\text{H}$  NMR (400 MHz, DMSO- $d_6$ )  $\delta$  10.30 (s, 1H), 8.06 (s, 1H), 7.67 (d,  $J = 7.3$  Hz, 2H), 7.59 (dd,  $J = 7.6, 7.6$  Hz, 2H), 7.50 (dd,  $J = 7.4, 7.4$  Hz, 1H), 7.42 (d,  $J = 7.1$  Hz, 2H), 7.36 (dd,  $J = 8.5, 7.3$  Hz, 2H), 7.11 (dd,  $J = 7.4, 7.4$  Hz, 1H), 3.23 (tt,  $J = 7.8, 4.7$  Hz, 1H), 1.82 – 1.75 (m, 1H), 1.03 – 0.94 (m, 4H), 0.56 (dt,  $J = 5.8, 2.6$  Hz, 2H), 0.49 (qd,  $J = 7.2, 5.7, 3.9$  Hz, 2H).  $^{13}\text{C}\{^1\text{H}\}$  NMR (100 MHz, DMSO- $d_6$ )  $\delta$  199.4, 165.0, 161.4, 156.2, 142.5, 139.3, 138.9, 129.6, 129.3, 129.0, 128.9, 125.4, 124.3, 120.1, 117.7, 19.8, 16.1, 12.5, 9.6. HRMS (ESI-TOF) Calcd for  $\text{C}_{25}\text{H}_{23}\text{N}_2\text{O}_3^+$  ( $[\text{M}+\text{H}]^+$ ) 399.1703. Found 399.1716.

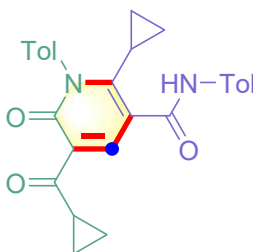

**2j2**, 5-(cyclopropanecarbonyl)-2-cyclopropyl-6-oxo-*N*,1-di-*p*-tolyl-1,6-dihydropyridine-3-carboxamide, yellow solid: mp 249–250 °C.  $^1\text{H}$  NMR (400 MHz, DMSO- $d_6$ )  $\delta$  10.19 (s, 1H), 8.02 (s, 1H), 7.54 (d,  $J = 8.5$  Hz, 2H), 7.38 (d,  $J = 8.1$  Hz, 2H), 7.27 (d,  $J = 8.3$  Hz, 2H), 7.16 (d,  $J = 8.3$  Hz, 2H), 3.22 (tt,  $J = 7.7, 4.7$  Hz, 1H), 2.41 (s, 3H), 2.28 (s, 3H), 1.80 – 1.73 (m, 1H), 1.02 – 0.93 (m, 4H), 0.58 – 0.48 (m, 4H).  $^{13}\text{C}\{^1\text{H}\}$  NMR (100 MHz, DMSO- $d_6$ )  $\delta$  199.4, 164.9, 161.4, 156.3, 142.4, 138.3, 136.8, 136.3, 133.3, 130.0, 129.7, 128.6, 125.3, 120.1, 117.6, 21.3, 21.0, 19.7, 16.1, 12.5, 9.6. HRMS (ESI-TOF) Calcd for  $\text{C}_{27}\text{H}_{27}\text{N}_2\text{O}_3^+$  ( $[\text{M}+\text{H}]^+$ ) 427.2016. Found 427.2014.

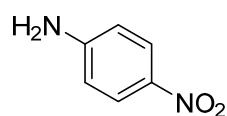

**3**, 4-nitroaniline, yellow solid: mp 148–149 °C.  $^1\text{H}$  NMR (400 MHz,  $\text{DMSO-}d_6$ )  $\delta$  7.95 (ddd,  $J = 9.2, 3.2, 3.3$  Hz, 2H), 6.73 (s, 2H), 6.60 (ddd,  $J = 9.1, 3.2, 3.3$  Hz, 2H).  $^{13}\text{C}\{^1\text{H}\}$  NMR (100 MHz,  $\text{DMSO-}d_6$ )  $\delta$  156.2, 136.1, 126.9, 112.8. HRMS (ESI-TOF) Calcd for  $\text{C}_6\text{H}_7\text{N}_2\text{O}_2^+$  ( $[\text{M}+\text{H}]^+$ ) 139.0502. Found 139.0496.

## VI. Single crystal X-ray diffraction studies

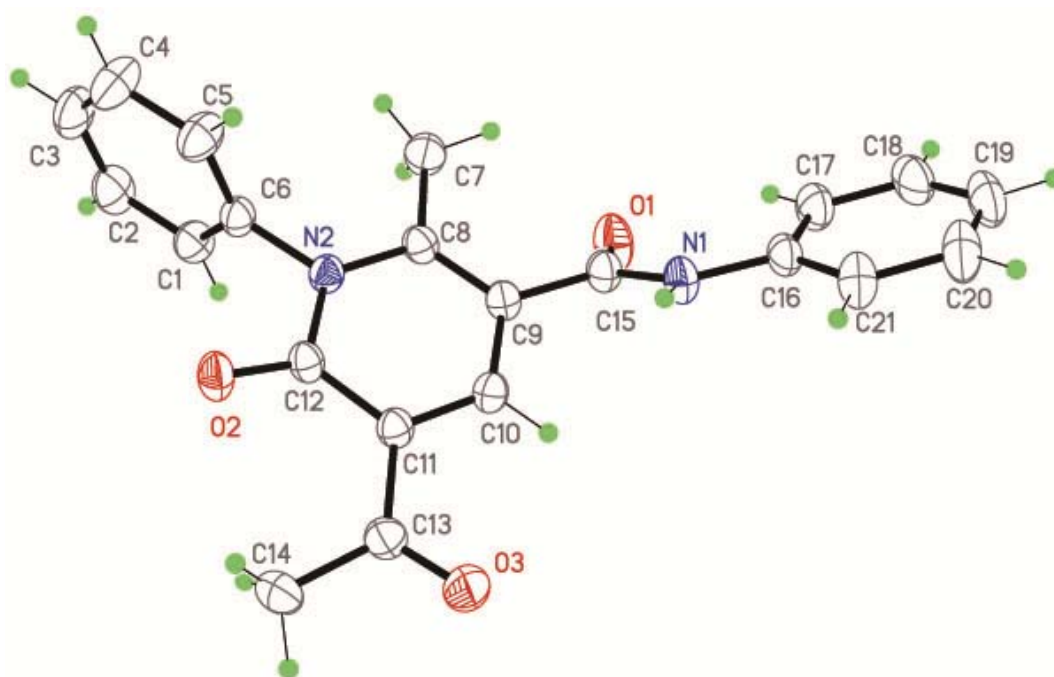

**Figure S18** X-ray crystal structure of **2a**

The test name of crystal **2a** is exp\_3536

### Crystal structure determination of [exp\_3536]

**Crystal Data** for  $\text{C}_{21}\text{H}_{18}\text{N}_2\text{O}_3$  ( $M = 346.37$ ): triclinic, space group P-1 (no. 2),  $a = 8.1439(10)$  Å,  $b = 9.6588(8)$  Å,  $c = 11.5840(13)$  Å,  $\alpha = 92.542(8)^\circ$ ,  $\beta = 98.729(10)^\circ$ ,  $\gamma = 97.055(9)^\circ$ ,  $V = 891.98(17)$  Å<sup>3</sup>,  $Z = 2$ ,  $T = 293(2)$  K,  $\mu(\text{Cu K}\alpha) = 0.708$  mm<sup>-1</sup>,  $D_{\text{calc}} = 1.290$  g/mm<sup>3</sup>, 5461 reflections measured ( $7.74 \leq 2\theta \leq 134.14$ ), 3166 unique ( $R_{\text{int}} = 0.0166$ ) which were used in all calculations. The final  $R_1$  was 0.0427 ( $>2\sigma(I)$ ) and  $wR_2$  was 0.1247 (all data).



**Table S6 Crystal data and structure refinement for exp\_3536**

|                                             |                                                               |
|---------------------------------------------|---------------------------------------------------------------|
| Identification code                         | exp_3536                                                      |
| Empirical formula                           | C <sub>21</sub> H <sub>18</sub> N <sub>2</sub> O <sub>3</sub> |
| Formula weight                              | 346.37                                                        |
| Temperature/K                               | 293(2)                                                        |
| Crystal system                              | triclinic                                                     |
| Space group                                 | P-1                                                           |
| a/Å                                         | 8.1439(10)                                                    |
| b/Å                                         | 9.6588(8)                                                     |
| c/Å                                         | 11.5840(13)                                                   |
| α/°                                         | 92.542(8)                                                     |
| β/°                                         | 98.729(10)                                                    |
| γ/°                                         | 97.055(9)                                                     |
| Volume/Å <sup>3</sup>                       | 891.98(17)                                                    |
| Z                                           | 2                                                             |
| ρ <sub>calc</sub> /mg/mm <sup>3</sup>       | 1.290                                                         |
| m/mm <sup>-1</sup>                          | 0.708                                                         |
| F(000)                                      | 364.0                                                         |
| Crystal size/mm <sup>3</sup>                | 0.26 × 0.12 × 0.11                                            |
| 2θ range for data collection                | 7.74 to 134.14°                                               |
| Index ranges                                | -9 ≤ h ≤ 9, -10 ≤ k ≤ 11, -13 ≤ l ≤ 10                        |
| Reflections collected                       | 5461                                                          |
| Independent reflections                     | 3166[R(int) = 0.0166]                                         |
| Data/restraints/parameters                  | 3166/0/238                                                    |
| Goodness-of-fit on F <sup>2</sup>           | 1.031                                                         |
| Final R indexes [I ≥ 2σ (I)]                | R <sub>1</sub> = 0.0427, wR <sub>2</sub> = 0.1144             |
| Final R indexes [all data]                  | R <sub>1</sub> = 0.0516, wR <sub>2</sub> = 0.1247             |
| Largest diff. peak/hole / e Å <sup>-3</sup> | 0.21/-0.16                                                    |

**Table S7 Fractional Atomic Coordinates (×10<sup>4</sup>) and Equivalent Isotropic Displacement Parameters (Å<sup>2</sup>×10<sup>3</sup>) for exp\_3536. U<sub>eq</sub> is defined as 1/3 of the trace of the orthogonalised U<sub>ij</sub> tensor.**

| <b>Atom</b> | <b>x</b>   | <b>y</b>   | <b>z</b>    | <b>U(eq)</b> |
|-------------|------------|------------|-------------|--------------|
| C1          | 591(2)     | 1104.0(17) | -1910.8(15) | 54.8(4)      |
| C2          | 178(3)     | 115(2)     | -2851.7(18) | 68.4(5)      |
| C3          | 1377(3)    | -233(2)    | -3479.0(18) | 75.4(6)      |
| C4          | 3000(3)    | 391(2)     | -3179.3(19) | 81.0(7)      |
| C5          | 3435(2)    | 1382(2)    | -2242.8(17) | 66.0(5)      |
| C6          | 2221(2)    | 1720.1(15) | -1621.8(13) | 45.3(4)      |
| C7          | 3263(3)    | 857.1(17)  | 621.8(16)   | 65.1(5)      |
| C8          | 3164.8(19) | 2377.9(15) | 476.6(13)   | 44.1(4)      |
| C9          | 3563.6(19) | 3393.0(16) | 1384.2(13)  | 43.9(4)      |
| C10         | 3339.6(19) | 4776.2(16) | 1147.9(13)  | 43.9(4)      |
| C11         | 2771.2(19) | 5167.3(15) | 53.8(13)    | 42.6(4)      |
| C12         | 2539.6(18) | 4161.7(15) | -928.2(13)  | 42.4(4)      |
| C13         | 2390(2)    | 6629.4(16) | -79.2(15)   | 50.7(4)      |
| C14         | 1414(3)    | 7030(2)    | -1185.5(19) | 76.7(6)      |
| C15         | 4118(2)    | 3020.3(17) | 2615.7(14)  | 48.9(4)      |
| C16         | 6279(2)    | 3827.7(19) | 4356.5(13)  | 50.6(4)      |
| C17         | 6027(3)    | 2697(2)    | 5028.5(15)  | 63.3(5)      |
| C18         | 7034(3)    | 2688(3)    | 6107.3(16)  | 75.1(6)      |
| C19         | 8243(3)    | 3767(3)    | 6520.4(16)  | 79.0(7)      |
| C20         | 8448(3)    | 4912(3)    | 5867.8(18)  | 80.4(7)      |
| C21         | 7469(2)    | 4947(2)    | 4784.1(16)  | 67.5(5)      |
| N1          | 5410.9(18) | 3905.1(14) | 3202.8(11)  | 51.7(4)      |
| N2          | 2656.3(16) | 2760.8(12) | -635.8(10)  | 42.1(3)      |
| O1          | 3441.6(18) | 1999.9(14) | 3027.2(11)  | 73.6(4)      |
| O2          | 2262.6(16) | 4393.0(11) | -1968.3(9)  | 55.7(3)      |
| O3          | 2809(2)    | 7485.3(13) | 747.2(12)   | 80.0(5)      |

**Table S8 Anisotropic Displacement Parameters ( $\text{\AA}^2 \times 10^3$ ) for exp\_3536. The Anisotropic displacement factor exponent takes the form:  $-2\pi^2[\mathbf{h}^2\mathbf{a}^{*2}\mathbf{U}_{11} + \dots + 2\mathbf{h}\mathbf{k}\mathbf{a} \times \mathbf{b} \times \mathbf{U}_{12}]$**

| <b>Atom</b> | <b>U<sub>11</sub></b> | <b>U<sub>22</sub></b> | <b>U<sub>33</sub></b> | <b>U<sub>23</sub></b> | <b>U<sub>13</sub></b> | <b>U<sub>12</sub></b> |
|-------------|-----------------------|-----------------------|-----------------------|-----------------------|-----------------------|-----------------------|
| C1          | 53.6(10)              | 49.9(9)               | 57.6(10)              | -0.3(7)               | 4.0(8)                | 0.5(7)                |

|     |           |           |          |           |           |          |
|-----|-----------|-----------|----------|-----------|-----------|----------|
| C2  | 66.5(12)  | 58.2(11)  | 68.9(12) | -4.6(9)   | -11.3(10) | -7.2(9)  |
| C3  | 98.2(16)  | 62.6(12)  | 56.3(11) | -15.7(9)  | -3.2(11)  | 0.4(11)  |
| C4  | 87.8(16)  | 83.8(14)  | 70.2(13) | -25.3(11) | 24.1(11)  | 2.9(12)  |
| C5  | 59.2(11)  | 69.8(12)  | 65.0(12) | -16.2(9)  | 11.8(9)   | -3.0(9)  |
| C6  | 52.7(9)   | 39.9(7)   | 40.1(8)  | 0.5(6)    | 1.1(7)    | 1.9(6)   |
| C7  | 93.0(14)  | 45.1(9)   | 55.9(10) | 6.0(8)    | 2.8(10)   | 14.4(9)  |
| C8  | 45.7(8)   | 42.9(8)   | 42.6(8)  | 6.9(6)    | 3.7(6)    | 4.4(6)   |
| C9  | 45.0(8)   | 45.3(8)   | 39.5(8)  | 4.1(6)    | 2.5(6)    | 2.9(6)   |
| C10 | 44.8(8)   | 44.2(8)   | 39.8(8)  | -1.3(6)   | 3.2(6)    | 0.4(6)   |
| C11 | 42.4(8)   | 41.5(8)   | 41.5(8)  | 2.6(6)    | 2.6(6)    | 1.1(6)   |
| C12 | 42.5(8)   | 41.7(8)   | 39.5(8)  | 4.6(6)    | 0.5(6)    | -1.1(6)  |
| C13 | 53.3(9)   | 41.7(8)   | 54.4(9)  | 3.7(7)    | 3.0(7)    | 2.2(7)   |
| C14 | 98.5(16)  | 57.9(11)  | 70.8(13) | 7.1(9)    | -11.7(11) | 29.2(11) |
| C15 | 55.0(9)   | 50.5(9)   | 39.6(8)  | 5.6(7)    | 4.1(7)    | 3.2(7)   |
| C16 | 49.7(9)   | 67.2(10)  | 35.1(8)  | 2.6(7)    | 4.0(7)    | 12.1(8)  |
| C17 | 74.5(12)  | 70.8(11)  | 43.1(9)  | 8.7(8)    | 2.4(8)    | 10.8(9)  |
| C18 | 84.2(15)  | 100.8(16) | 44.4(10) | 19.1(10)  | 5.5(10)   | 28.2(12) |
| C19 | 62.9(12)  | 133(2)    | 40.2(10) | 4.7(11)   | -1.5(9)   | 22.3(13) |
| C20 | 61.0(12)  | 120.2(19) | 51.0(11) | -7.9(12)  | -3.9(9)   | -3.0(12) |
| C21 | 63.3(12)  | 85.6(13)  | 47.3(10) | 1.5(9)    | -0.5(8)   | -3(1)    |
| N1  | 55.9(8)   | 56.6(8)   | 38.1(7)  | 7.6(6)    | -0.9(6)   | -1.1(6)  |
| N2  | 46.9(7)   | 38.7(6)   | 38.6(7)  | 0.8(5)    | 3.5(5)    | 2.2(5)   |
| O1  | 84.6(10)  | 72.4(8)   | 53.4(7)  | 20.9(6)   | -2.7(6)   | -20.2(7) |
| O2  | 74.1(8)   | 49.7(6)   | 38.2(6)  | 6.8(5)    | -1.1(5)   | -1.2(5)  |
| O3  | 115.3(12) | 45.6(7)   | 70.2(9)  | -7.4(6)   | -14.0(8)  | 15.3(7)  |

**Table S9 Bond Lengths for exp\_3536.**

| Atom Atom Length/Å |    |          | Atom Atom Length/Å |     |            |
|--------------------|----|----------|--------------------|-----|------------|
| C1                 | C2 | 1.389(2) | C11                | C13 | 1.492(2)   |
| C1                 | C6 | 1.371(2) | C12                | N2  | 1.4203(19) |
| C2                 | C3 | 1.367(3) | C12                | O2  | 1.2273(18) |
| C3                 | C4 | 1.370(3) | C13                | C14 | 1.495(2)   |
| C4                 | C5 | 1.388(3) | C13                | O3  | 1.216(2)   |

|     |     |            |     |     |            |
|-----|-----|------------|-----|-----|------------|
| C5  | C6  | 1.370(3)   | C15 | N1  | 1.346(2)   |
| C6  | N2  | 1.4589(19) | C15 | O1  | 1.221(2)   |
| C7  | C8  | 1.496(2)   | C16 | C17 | 1.382(3)   |
| C8  | C9  | 1.378(2)   | C16 | C21 | 1.379(3)   |
| C8  | N2  | 1.3735(19) | C16 | N1  | 1.4235(19) |
| C9  | C10 | 1.404(2)   | C17 | C18 | 1.388(2)   |
| C9  | C15 | 1.503(2)   | C18 | C19 | 1.358(3)   |
| C10 | C11 | 1.368(2)   | C19 | C20 | 1.375(3)   |
| C11 | C12 | 1.437(2)   | C20 | C21 | 1.385(3)   |

**Table S10 Bond Angles for exp\_3536.**

| Atom Atom Atom Angle/° |     |     |            | Atom Atom Atom Angle/° |     |     |            |
|------------------------|-----|-----|------------|------------------------|-----|-----|------------|
| C6                     | C1  | C2  | 118.86(18) | O2                     | C12 | N2  | 118.01(13) |
| C3                     | C2  | C1  | 120.47(18) | C11                    | C13 | C14 | 120.96(15) |
| C2                     | C3  | C4  | 119.97(18) | O3                     | C13 | C11 | 119.21(15) |
| C3                     | C4  | C5  | 120.4(2)   | O3                     | C13 | C14 | 119.73(16) |
| C6                     | C5  | C4  | 118.99(18) | N1                     | C15 | C9  | 113.89(13) |
| C1                     | C6  | N2  | 118.95(15) | O1                     | C15 | C9  | 122.03(14) |
| C5                     | C6  | C1  | 121.33(15) | O1                     | C15 | N1  | 124.07(15) |
| C5                     | C6  | N2  | 119.72(14) | C17                    | C16 | N1  | 123.84(16) |
| C9                     | C8  | C7  | 123.84(14) | C21                    | C16 | C17 | 119.86(16) |
| N2                     | C8  | C7  | 116.96(14) | C21                    | C16 | N1  | 116.27(16) |
| N2                     | C8  | C9  | 119.19(13) | C16                    | C17 | C18 | 118.89(19) |
| C8                     | C9  | C10 | 118.53(13) | C19                    | C18 | C17 | 121.6(2)   |
| C8                     | C9  | C15 | 120.98(13) | C18                    | C19 | C20 | 119.26(18) |
| C10                    | C9  | C15 | 120.37(14) | C19                    | C20 | C21 | 120.4(2)   |
| C11                    | C10 | C9  | 123.01(14) | C16                    | C21 | C20 | 119.9(2)   |
| C10                    | C11 | C12 | 119.37(13) | C15                    | N1  | C16 | 128.38(14) |
| C10                    | C11 | C13 | 118.65(14) | C8                     | N2  | C6  | 121.00(12) |
| C12                    | C11 | C13 | 121.97(13) | C8                     | N2  | C12 | 124.05(12) |
| N2                     | C12 | C11 | 115.03(13) | C12                    | N2  | C6  | 114.94(12) |
| O2                     | C12 | C11 | 126.96(14) |                        |     |     |            |

**Table S11 Torsion Angles for exp\_3536.**

| A   | B   | C   | D   | Angle/°     | A   | B   | C   | D   | Angle/°     |
|-----|-----|-----|-----|-------------|-----|-----|-----|-----|-------------|
| C1  | C2  | C3  | C4  | 0.1(3)      | C10 | C11 | C12 | N2  | 10.4(2)     |
| C1  | C6  | N2  | C8  | 90.50(19)   | C10 | C11 | C12 | O2  | -169.35(16) |
| C1  | C6  | N2  | C12 | -90.61(17)  | C10 | C11 | C13 | C14 | -166.07(18) |
| C2  | C1  | C6  | C5  | 0.2(3)      | C10 | C11 | C13 | O3  | 10.2(3)     |
| C2  | C1  | C6  | N2  | 179.86(15)  | C11 | C12 | N2  | C6  | 172.87(13)  |
| C2  | C3  | C4  | C5  | -0.2(4)     | C11 | C12 | N2  | C8  | -8.3(2)     |
| C3  | C4  | C5  | C6  | 0.3(4)      | C12 | C11 | C13 | C14 | 13.2(3)     |
| C4  | C5  | C6  | C1  | -0.2(3)     | C12 | C11 | C13 | O3  | -170.57(16) |
| C4  | C5  | C6  | N2  | -179.92(18) | C13 | C11 | C12 | N2  | -168.82(13) |
| C5  | C6  | N2  | C8  | -89.8(2)    | C13 | C11 | C12 | O2  | 11.4(3)     |
| C5  | C6  | N2  | C12 | 89.06(19)   | C15 | C9  | C10 | C11 | -177.21(14) |
| C6  | C1  | C2  | C3  | -0.1(3)     | C16 | C17 | C18 | C19 | 0.7(3)      |
| C7  | C8  | C9  | C10 | -176.81(16) | C17 | C16 | C21 | C20 | 2.3(3)      |
| C7  | C8  | C9  | C15 | -0.8(2)     | C17 | C16 | N1  | C15 | 7.7(3)      |
| C7  | C8  | N2  | C6  | 0.5(2)      | C17 | C18 | C19 | C20 | 1.6(3)      |
| C7  | C8  | N2  | C12 | -178.25(15) | C18 | C19 | C20 | C21 | -2.0(3)     |
| C8  | C9  | C10 | C11 | -1.2(2)     | C19 | C20 | C21 | C16 | 0.1(3)      |
| C8  | C9  | C15 | N1  | 137.76(16)  | C21 | C16 | C17 | C18 | -2.7(3)     |
| C8  | C9  | C15 | O1  | -42.0(2)    | C21 | C16 | N1  | C15 | -174.46(18) |
| C9  | C8  | N2  | C6  | -179.94(14) | N1  | C16 | C17 | C18 | 175.10(17)  |
| C9  | C8  | N2  | C12 | 1.3(2)      | N1  | C16 | C21 | C20 | -175.65(17) |
| C9  | C10 | C11 | C12 | -6.2(2)     | N2  | C8  | C9  | C10 | 3.7(2)      |
| C9  | C10 | C11 | C13 | 173.04(14)  | N2  | C8  | C9  | C15 | 179.72(14)  |
| C9  | C15 | N1  | C16 | -177.24(15) | O1  | C15 | N1  | C16 | 2.6(3)      |
| C10 | C9  | C15 | N1  | -46.3(2)    | O2  | C12 | N2  | C6  | -7.3(2)     |
| C10 | C9  | C15 | O1  | 133.89(19)  | O2  | C12 | N2  | C8  | 171.52(14)  |

**Table S12 Hydrogen Atom Coordinates ( $\text{\AA} \times 10^4$ ) and Isotropic Displacement Parameters ( $\text{\AA}^2 \times 10^3$ ) for exp\_3536.**

| Atom | x    | y    | z     | U(eq) |
|------|------|------|-------|-------|
| H1   | -223 | 1344 | -1484 | 66    |

|      |      |      |       |     |
|------|------|------|-------|-----|
| H2   | -922 | -312 | -3056 | 82  |
| H3   | 1091 | -894 | -4109 | 91  |
| H4   | 3813 | 150  | -3606 | 97  |
| H5   | 4535 | 1810 | -2040 | 79  |
| H7A  | 2155 | 371  | 595   | 98  |
| H7B  | 3928 | 744  | 1362  | 98  |
| H7C  | 3769 | 480  | 2     | 98  |
| H10  | 3589 | 5458 | 1763  | 53  |
| H14A | 1093 | 7942 | -1062 | 115 |
| H14B | 428  | 6363 | -1410 | 115 |
| H14C | 2094 | 7042 | -1794 | 115 |
| H1A  | 5939 | 4629 | 2750  | 92  |
| H17  | 5196 | 1954 | 4762  | 76  |
| H18  | 6877 | 1924 | 6559  | 90  |
| H19  | 8924 | 3731 | 7237  | 95  |
| H20  | 9249 | 5668 | 6155  | 97  |
| H21  | 7614 | 5723 | 4346  | 81  |

## VII. UV-vis spectra

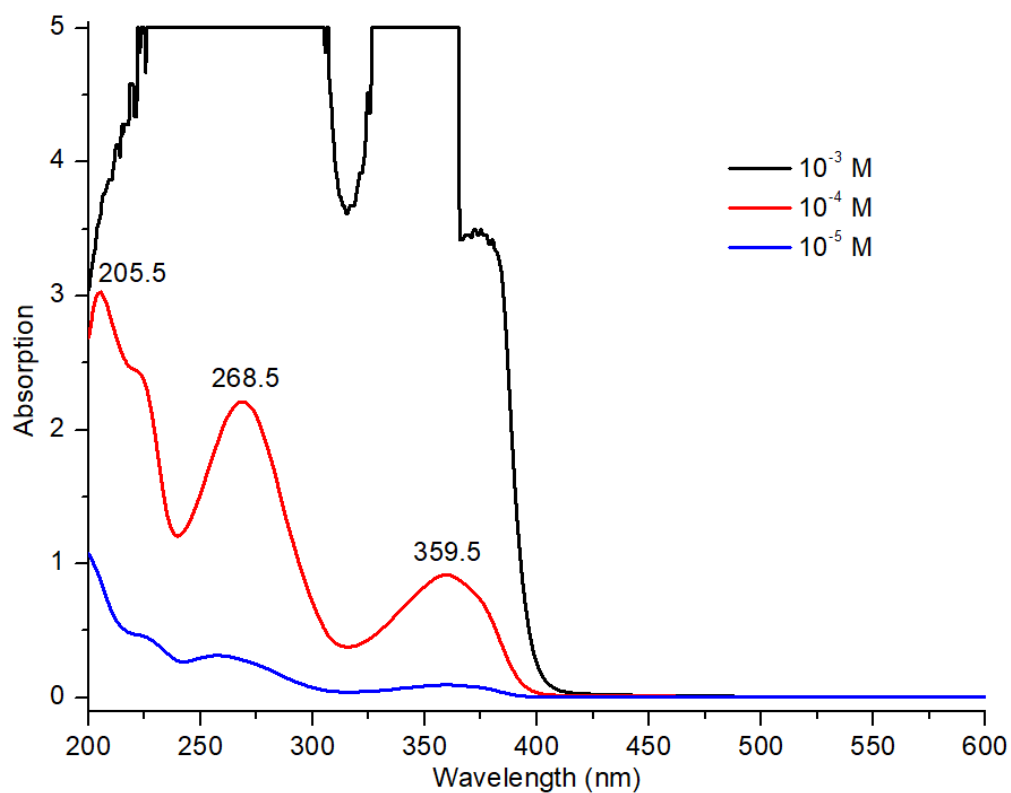

Figure S19 UV-vis spectra of **2b3** (in  $\text{CH}_3\text{CN}$ )

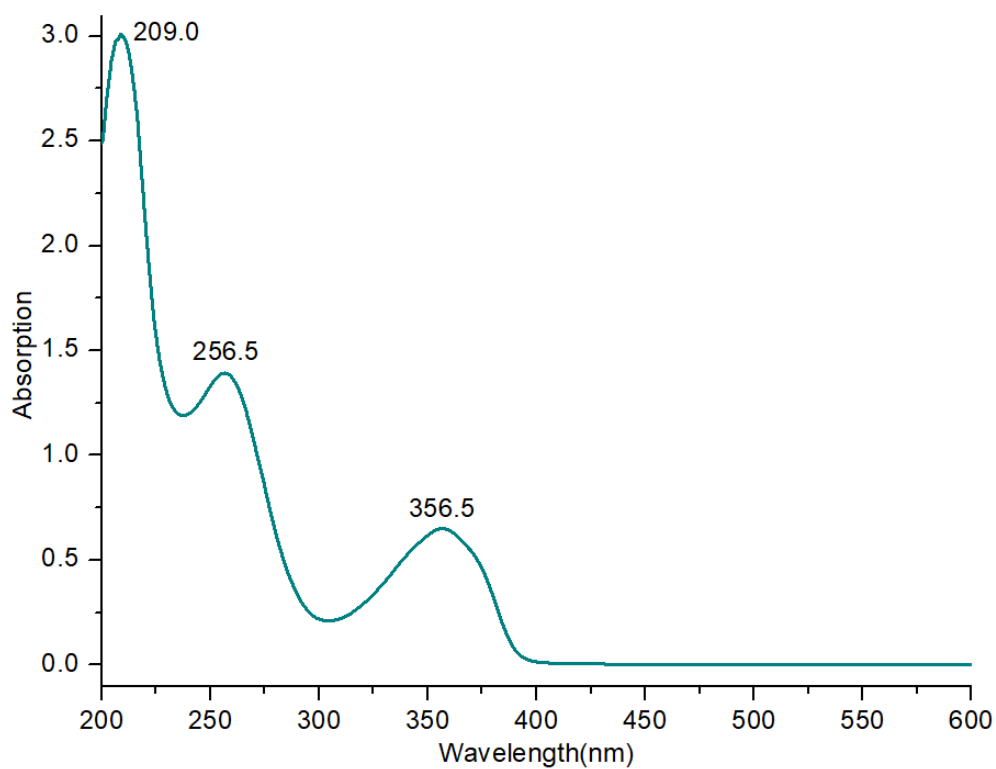

Figure S20 UV-vis spectra of **2d1** ( $10^{-4}$  M in  $\text{CH}_3\text{CN}$ )

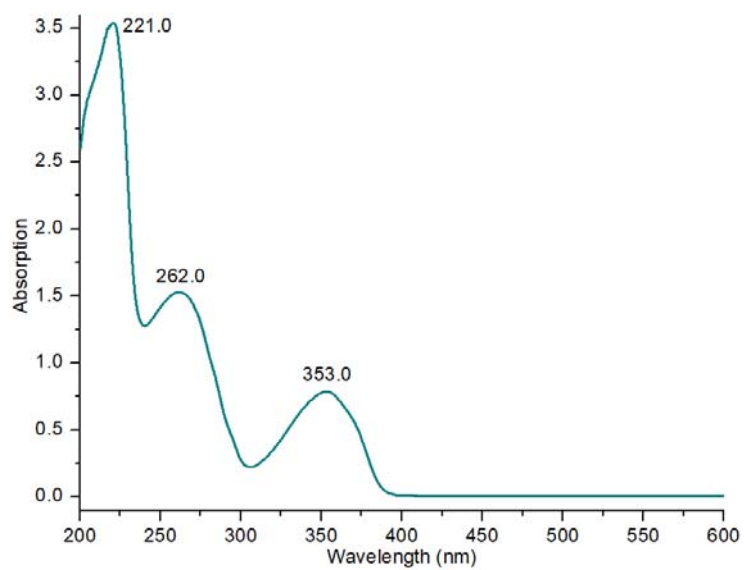

**Figure S21** UV-vis spectra of **2f** ( $10^{-4}$  M in  $\text{CH}_3\text{CN}$ )

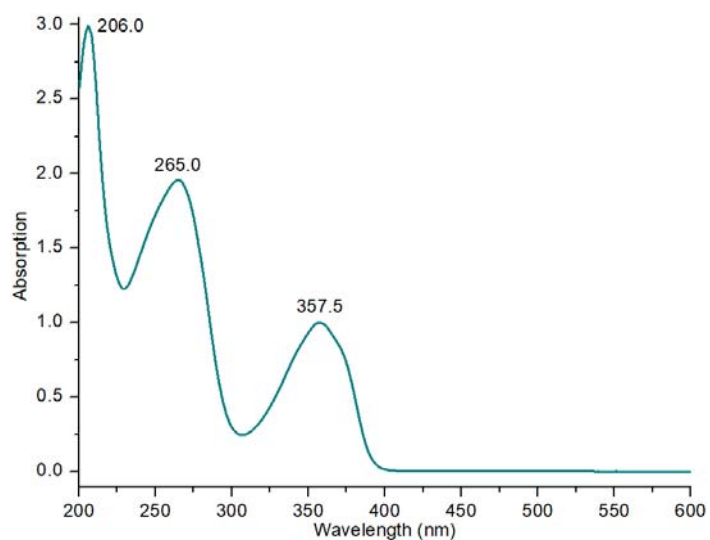

**Figure S22** UV-vis spectra of **2il** ( $10^{-4}$  M in  $\text{CH}_3\text{CN}$ )

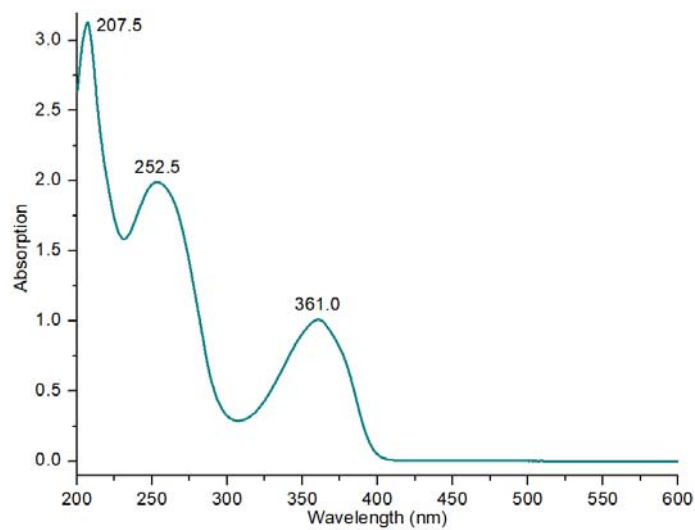

**Figure S23** UV-vis spectra of **2j1** ( $10^{-4}$  M in  $\text{CH}_3\text{CN}$ )



## VIII. IR spectra

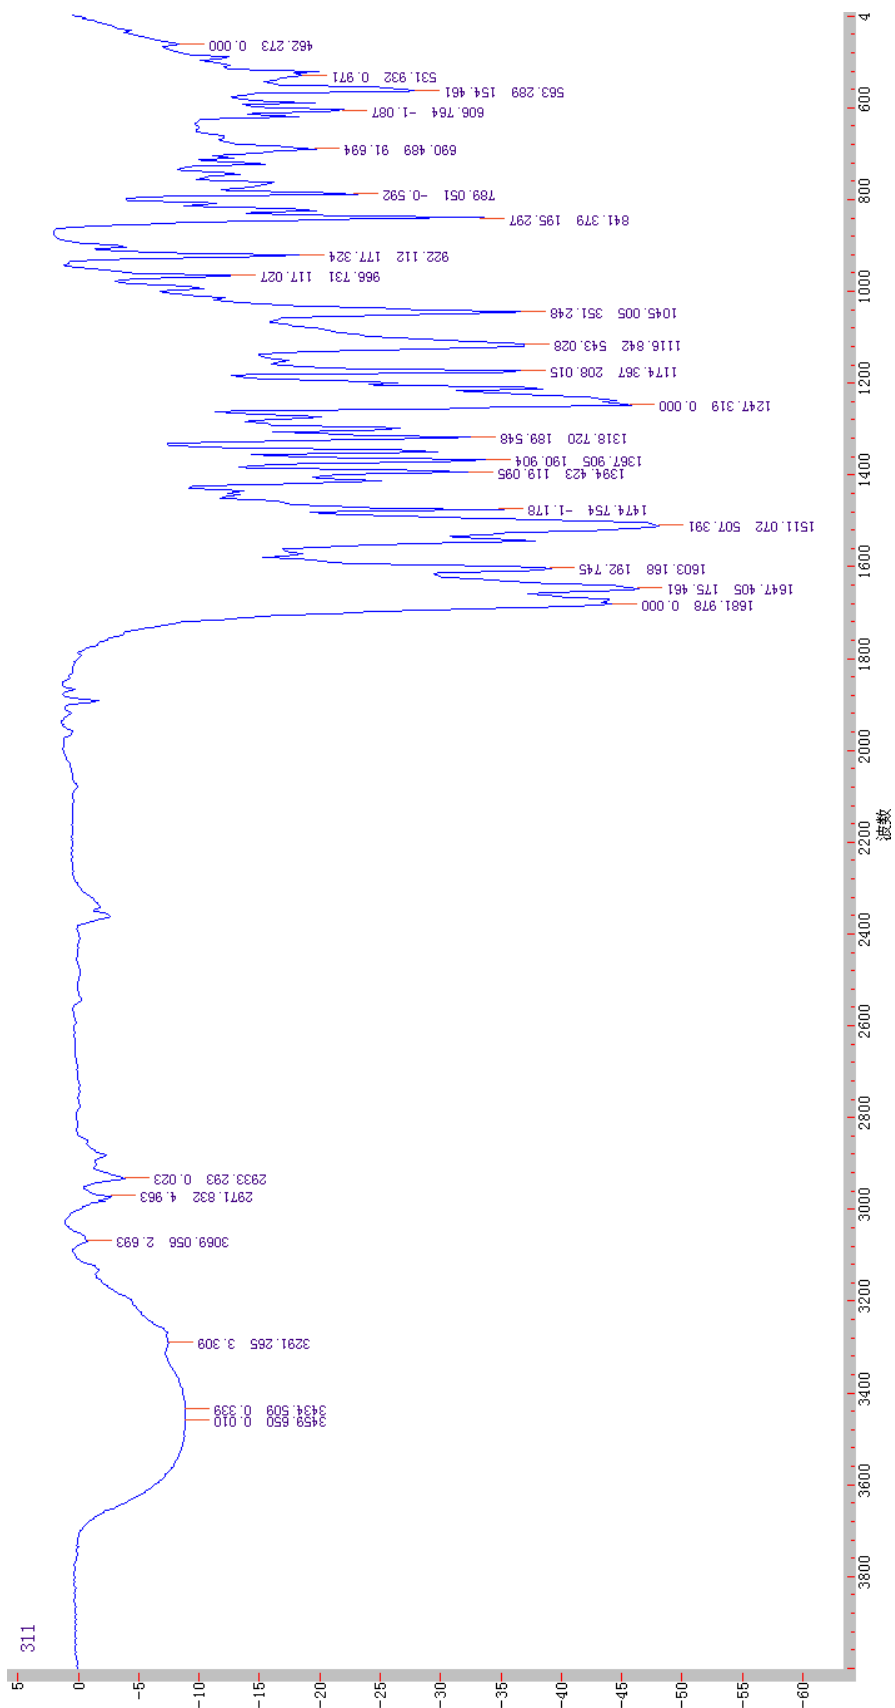

Figure S24 IR spectra of 2b3

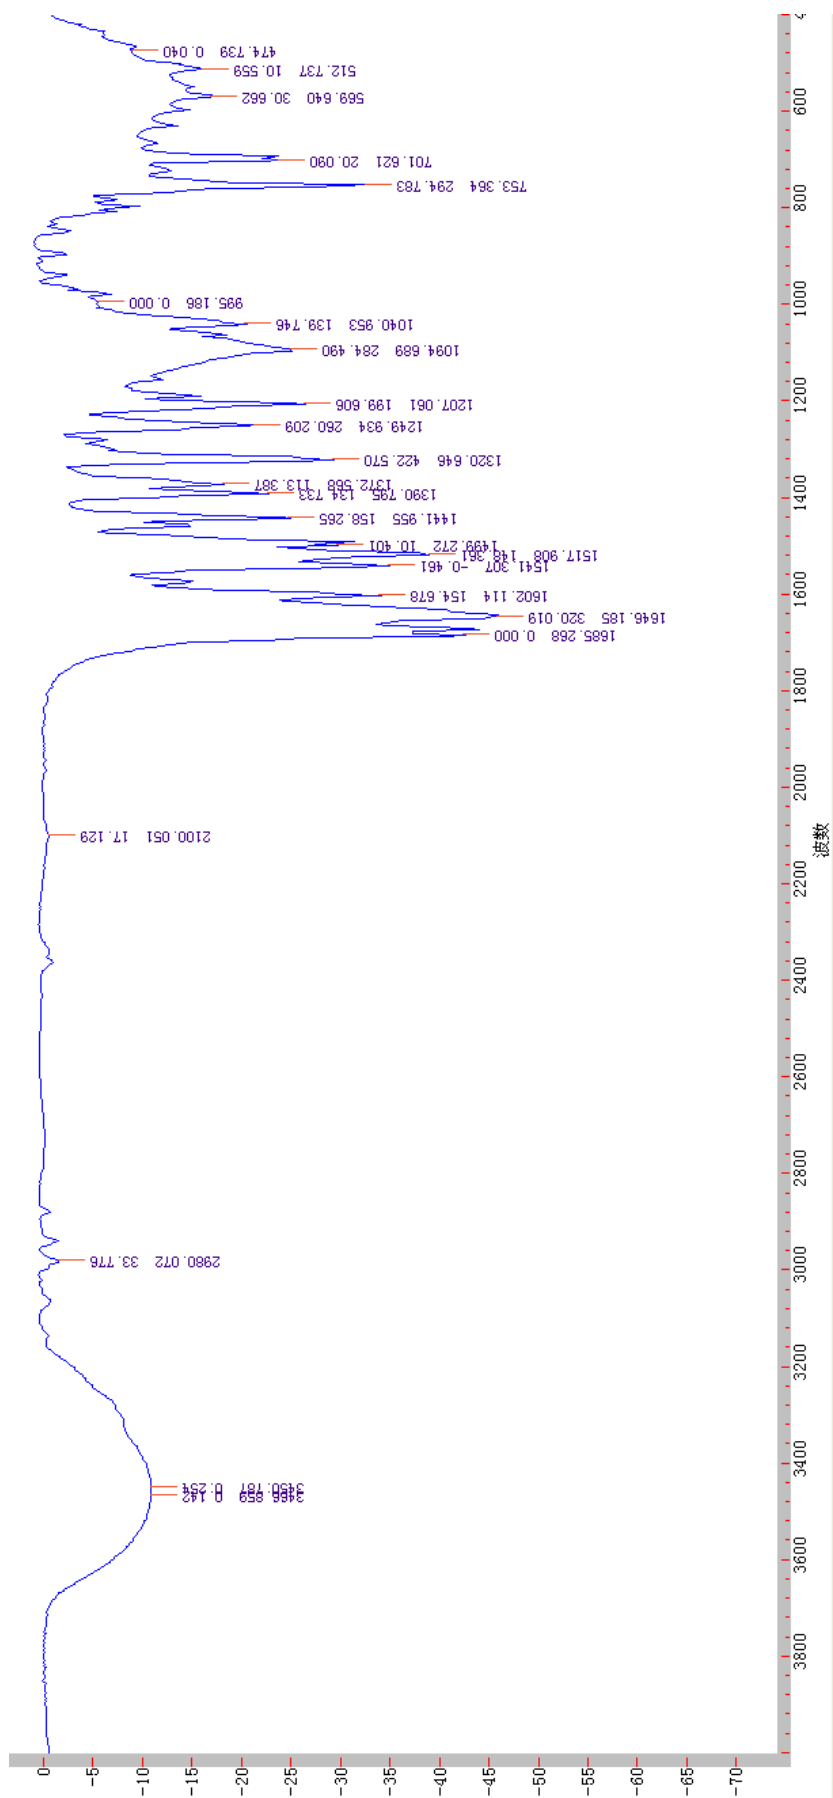

Figure S25 IR spectra of 2f

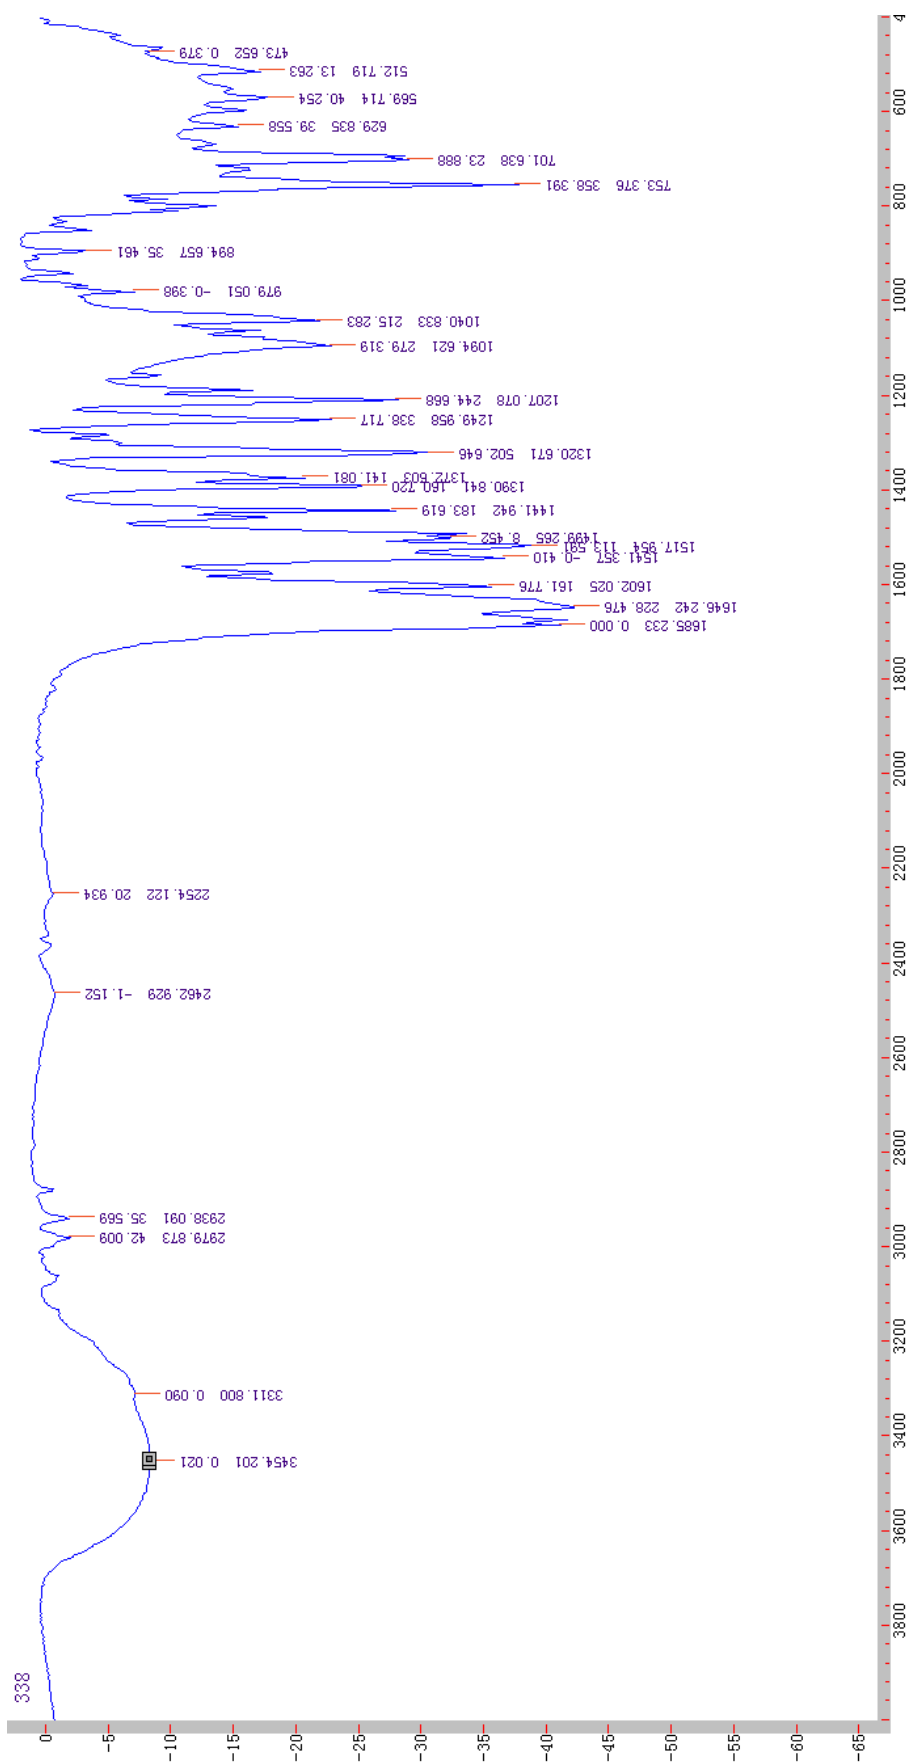

Figure S26 IR spectra of 2i1

# IX. Copies of $^1\text{H}$ , $^{19}\text{F}$ , $^{13}\text{C}$ and DEPT NMR spectra

## 2a, $^1\text{H}$ NMR

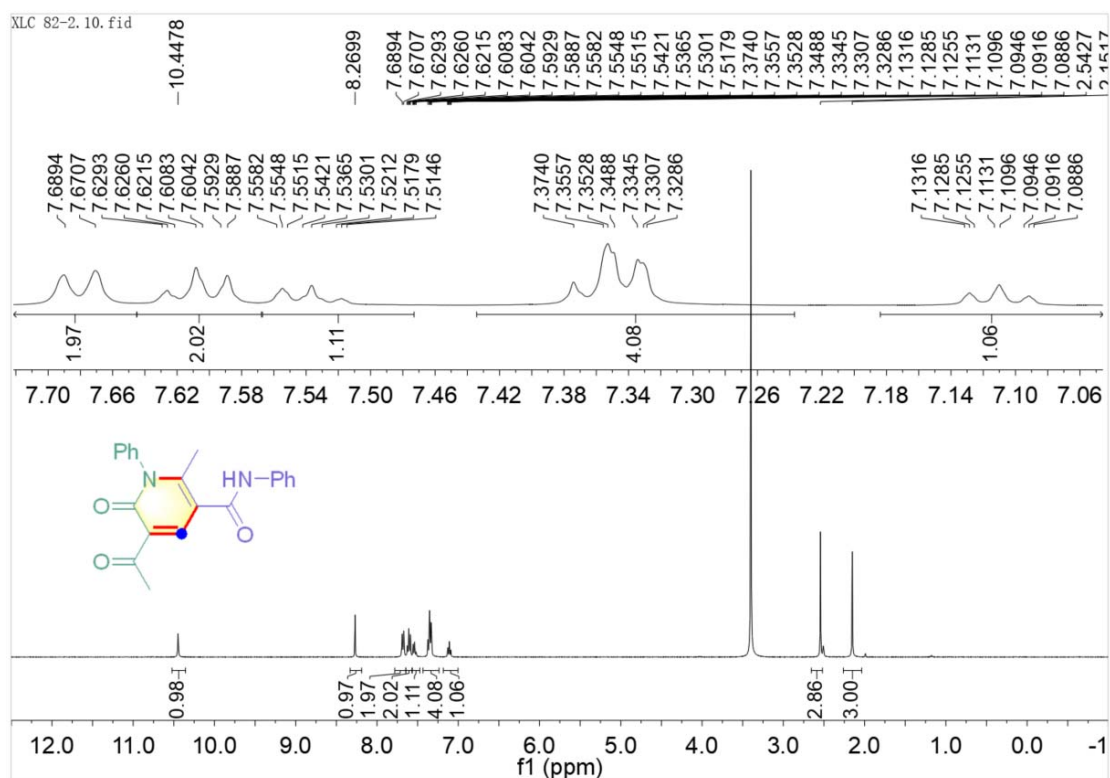

## $^{13}\text{C}$ NMR

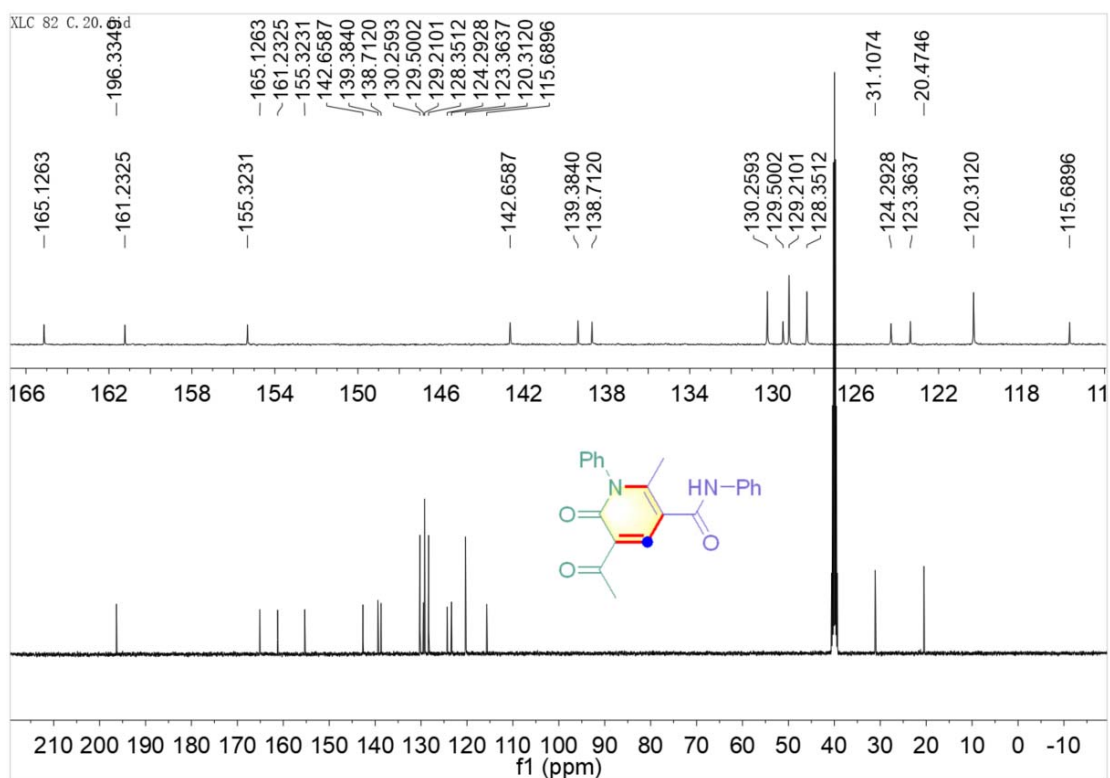

# DEPT 90 and DEPT 135

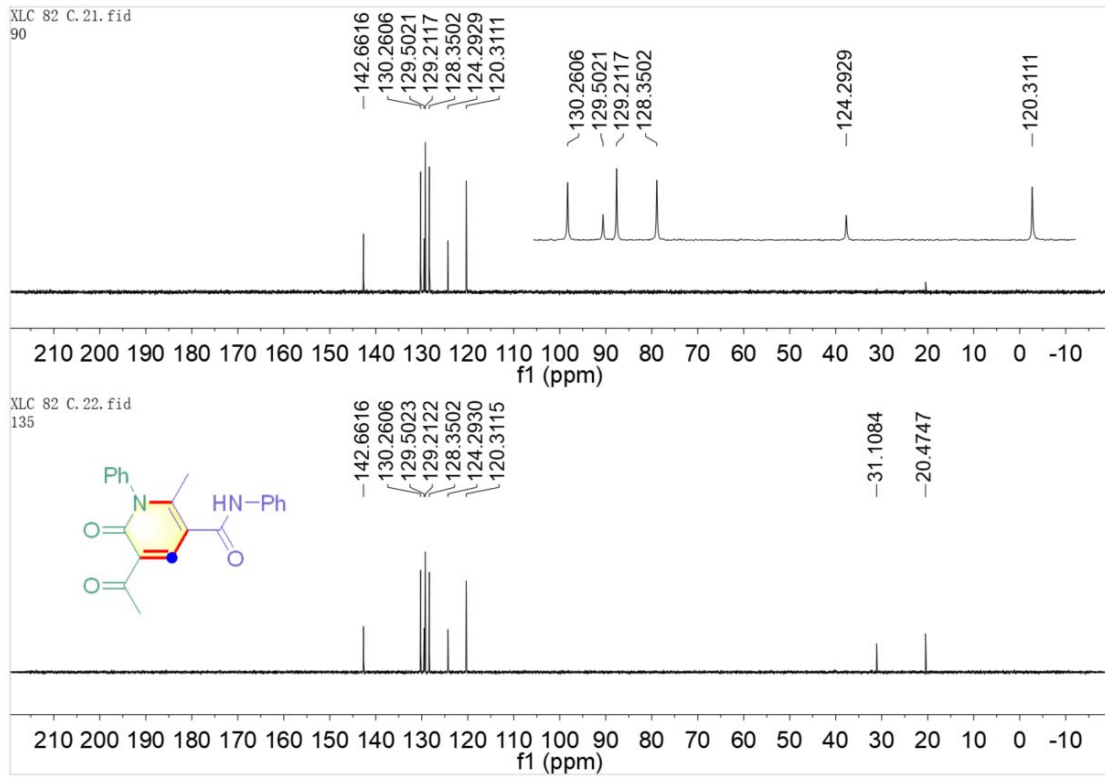

### 2b1, <sup>1</sup>H NMR

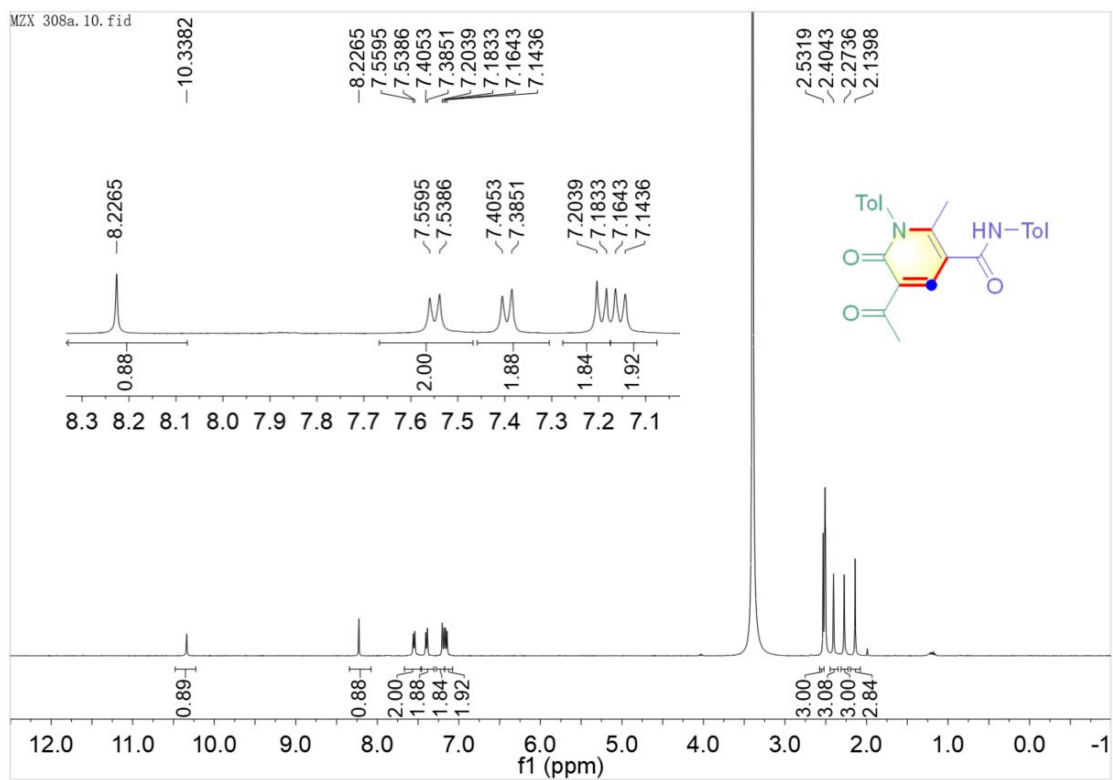

### <sup>13</sup>C NMR

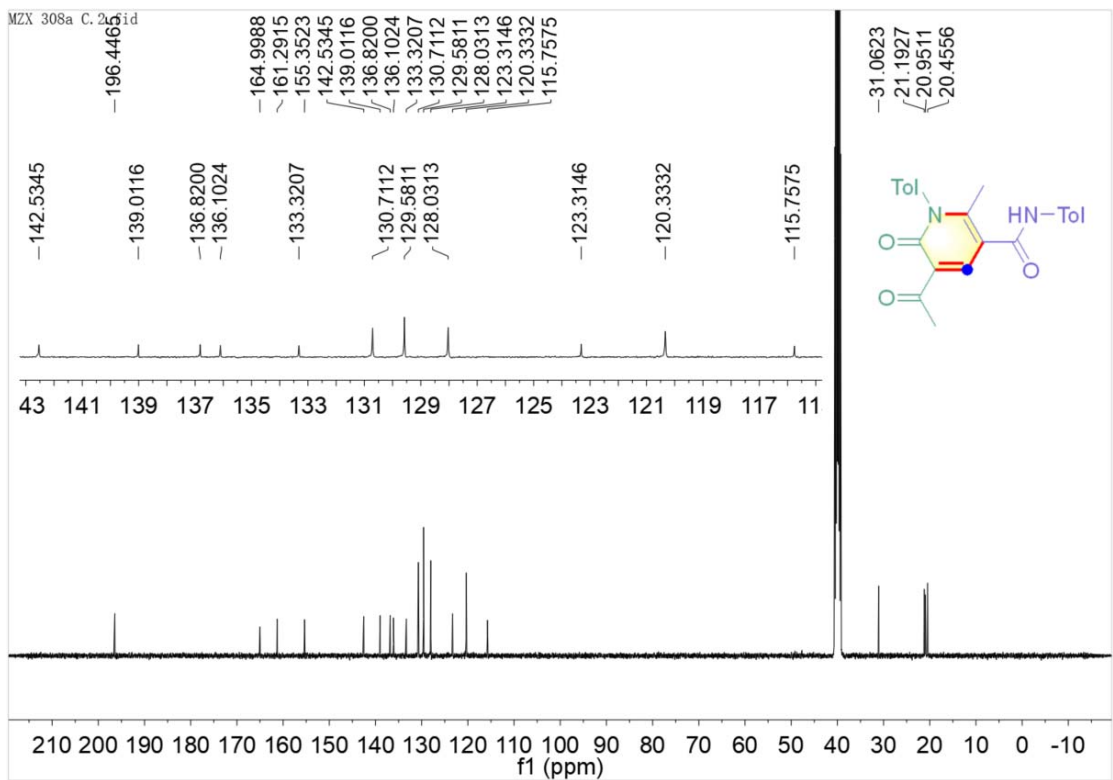

# DEPT 90 and DEPT 135

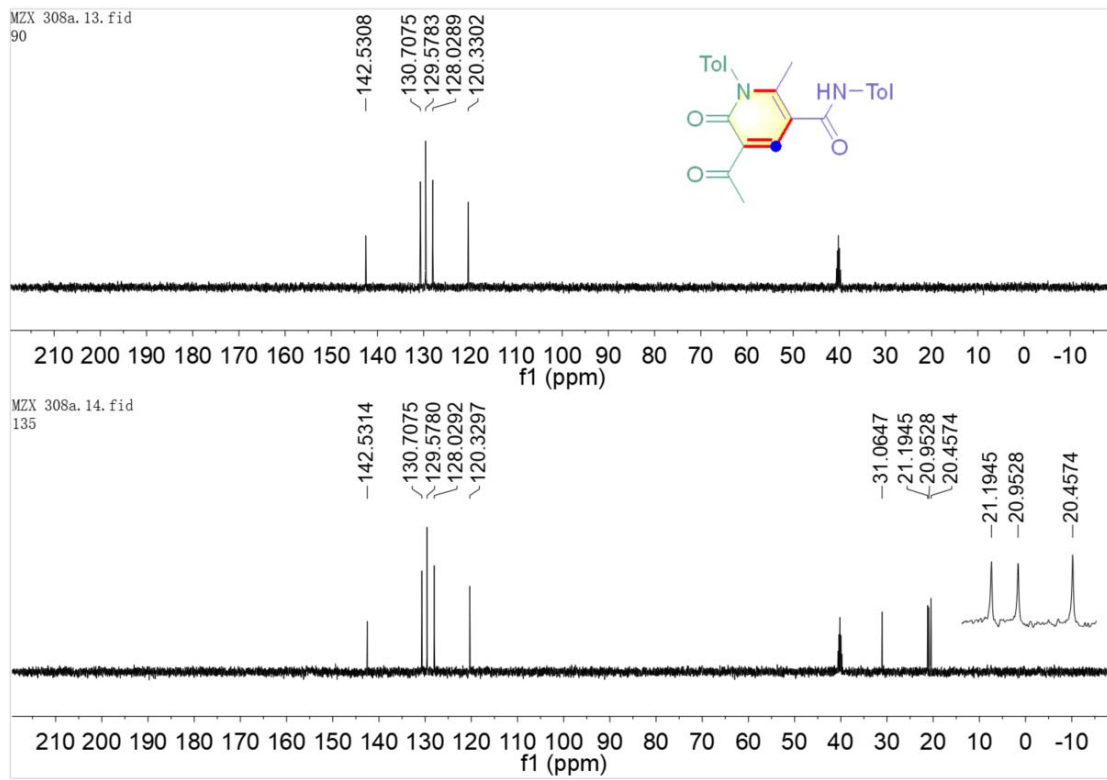

## 2b2, <sup>1</sup>H NMR

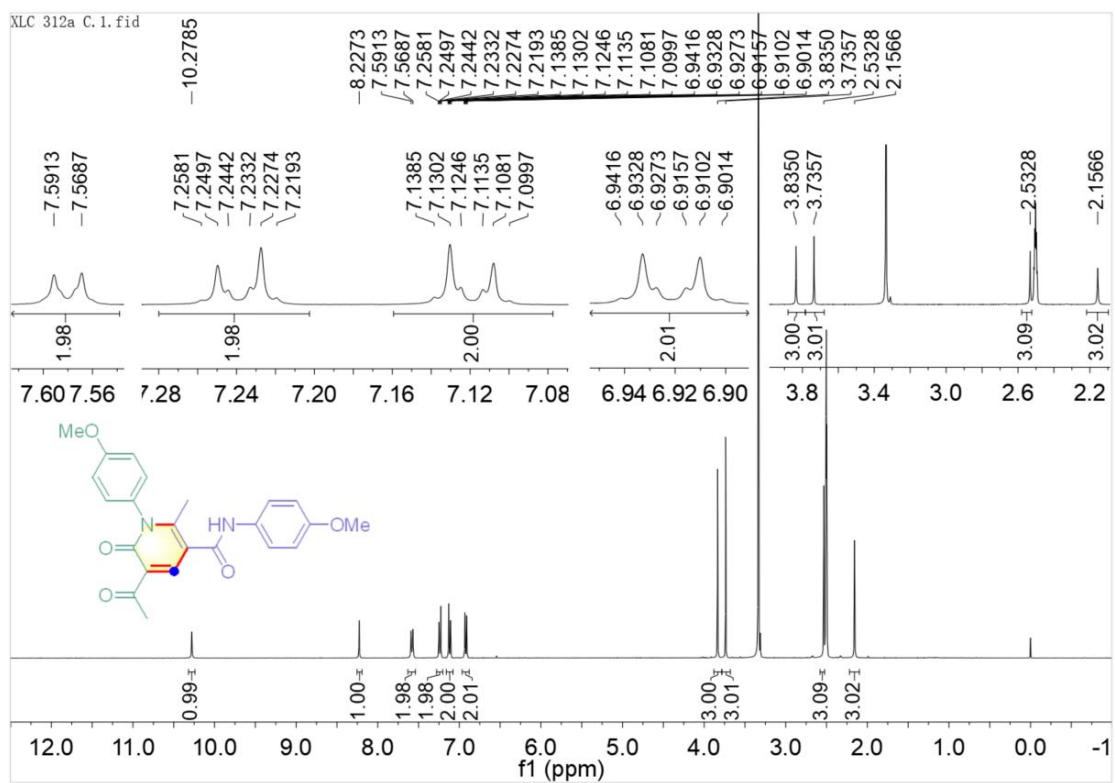

## <sup>13</sup>C NMR

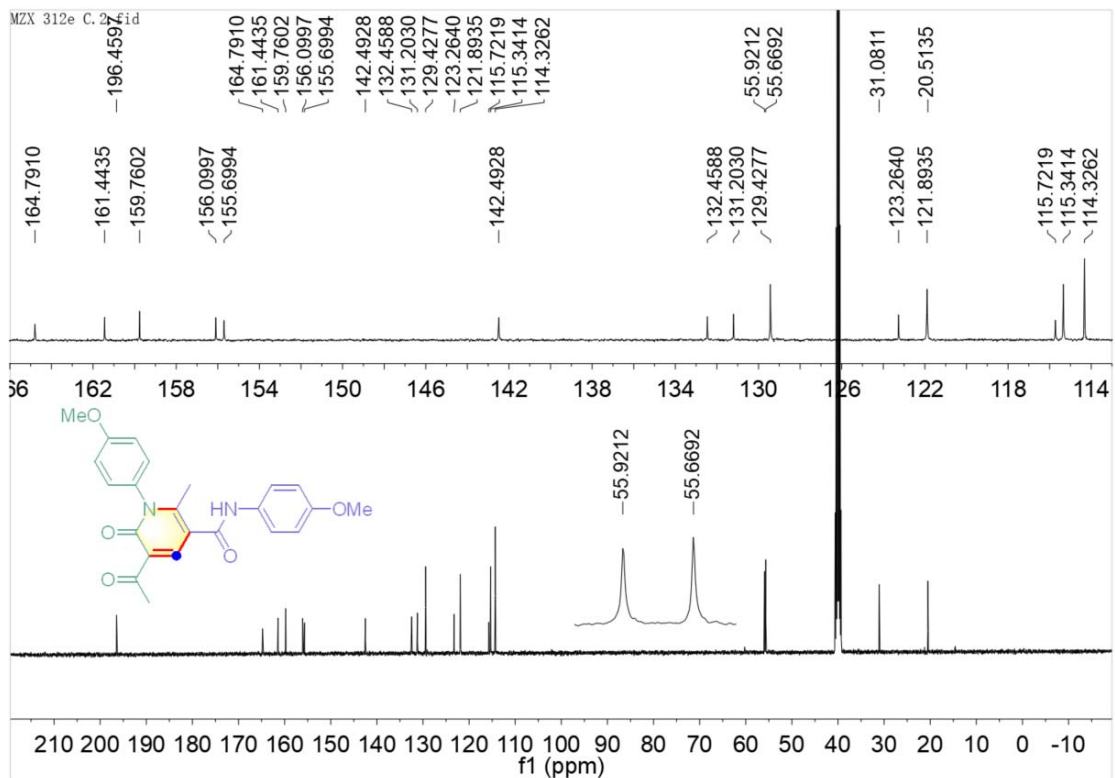



# DEPT 90 and DEPT 135

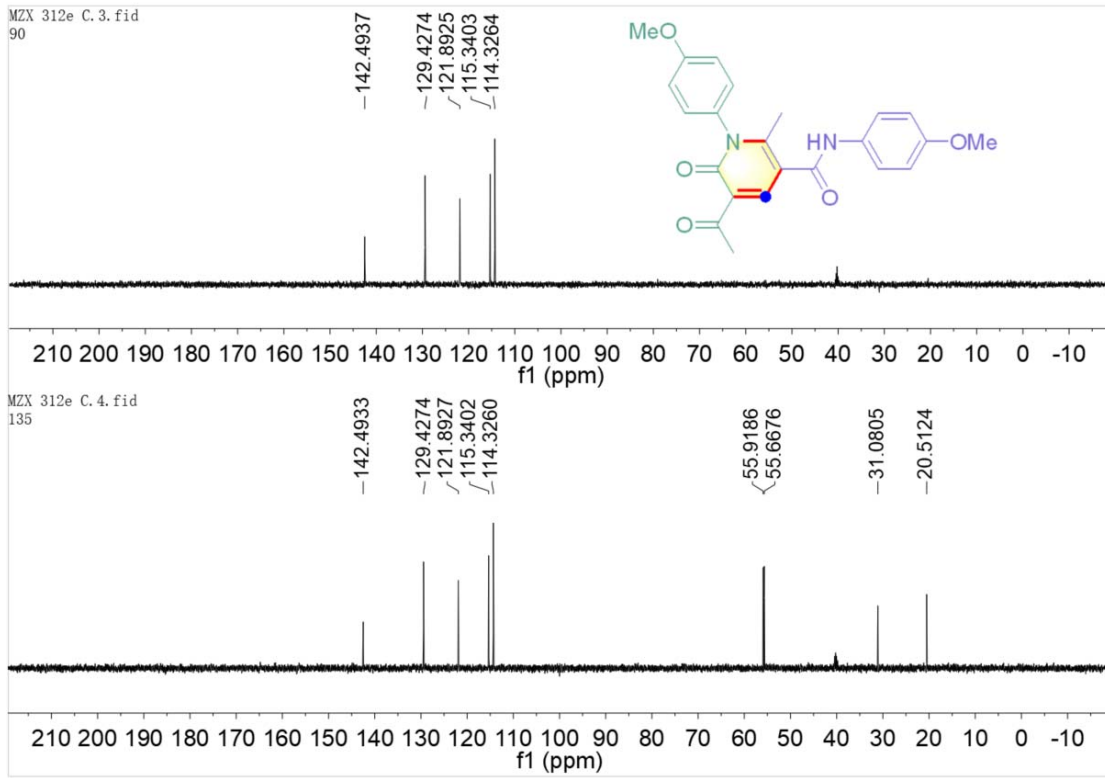

2b3, <sup>1</sup>H NMR

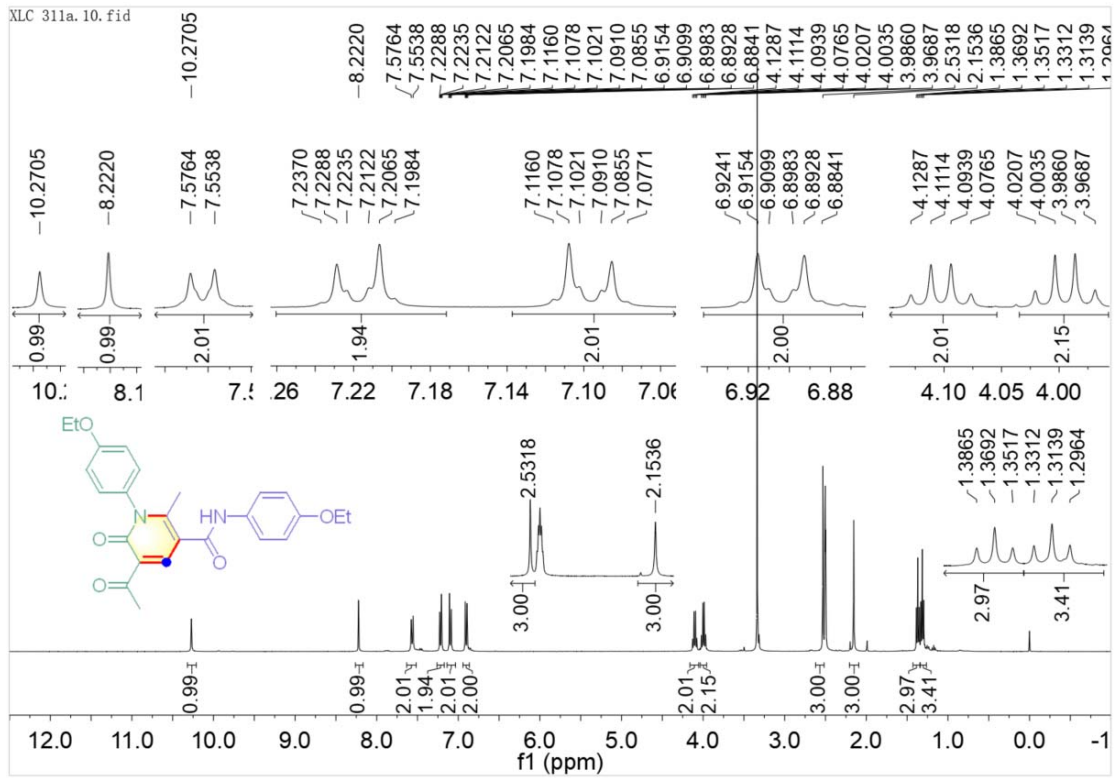

<sup>13</sup>C NMR

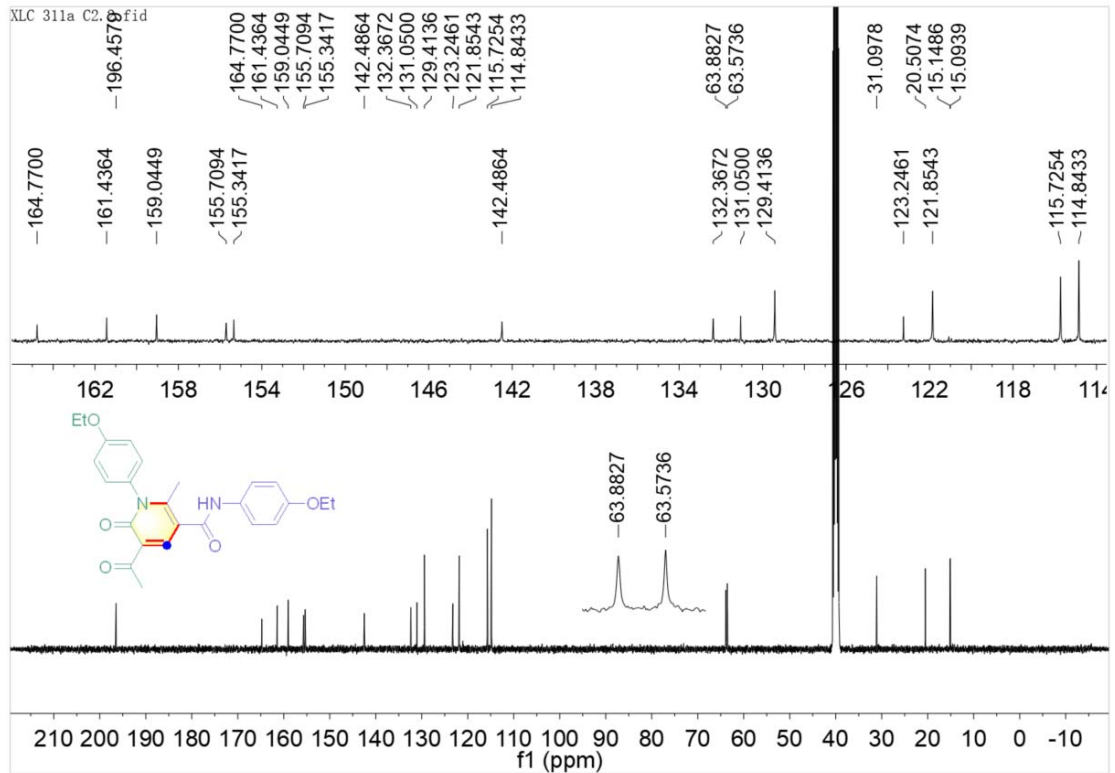

# DEPT 90 and DEPT 135

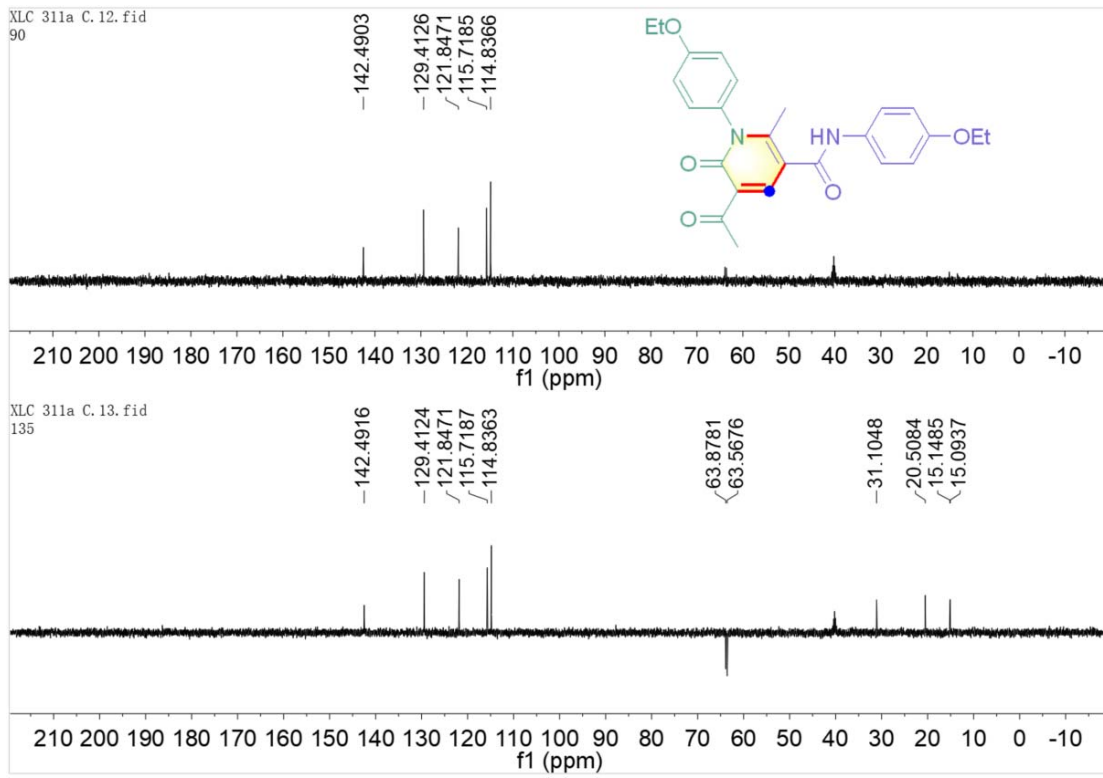

**2b4**, <sup>1</sup>H NMR (in pyridine-*d*<sub>5</sub>)

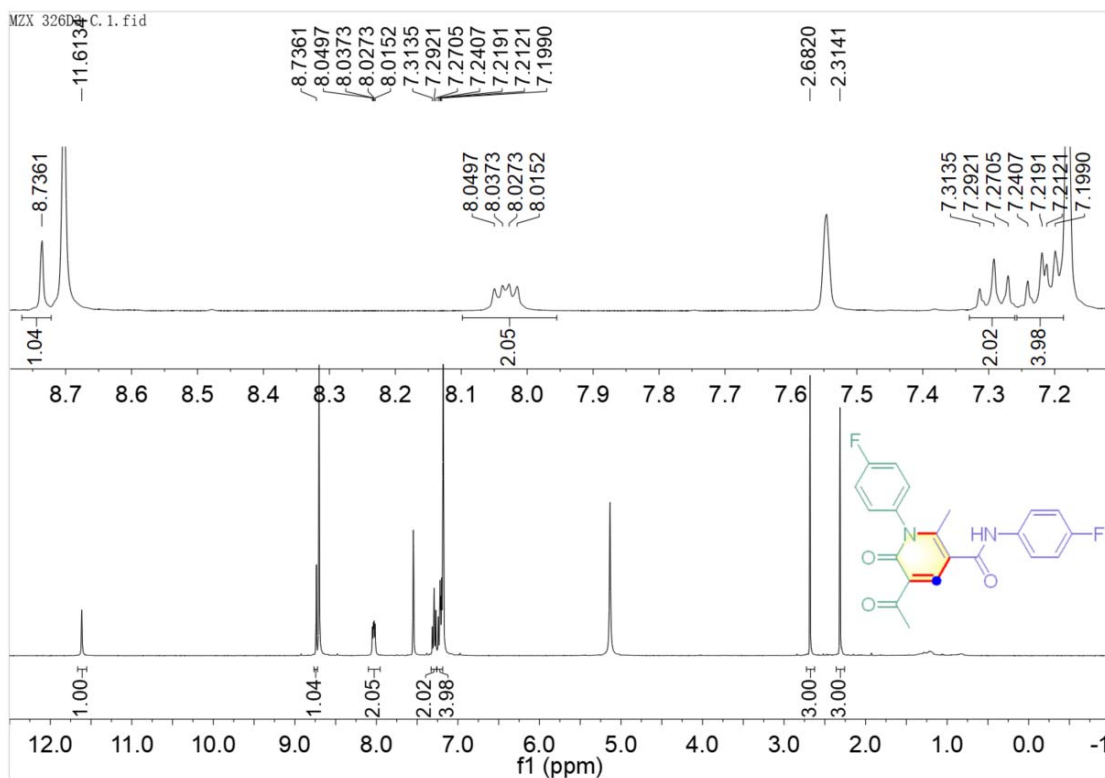

<sup>13</sup>C NMR (in pyridine-*d*<sub>5</sub>)

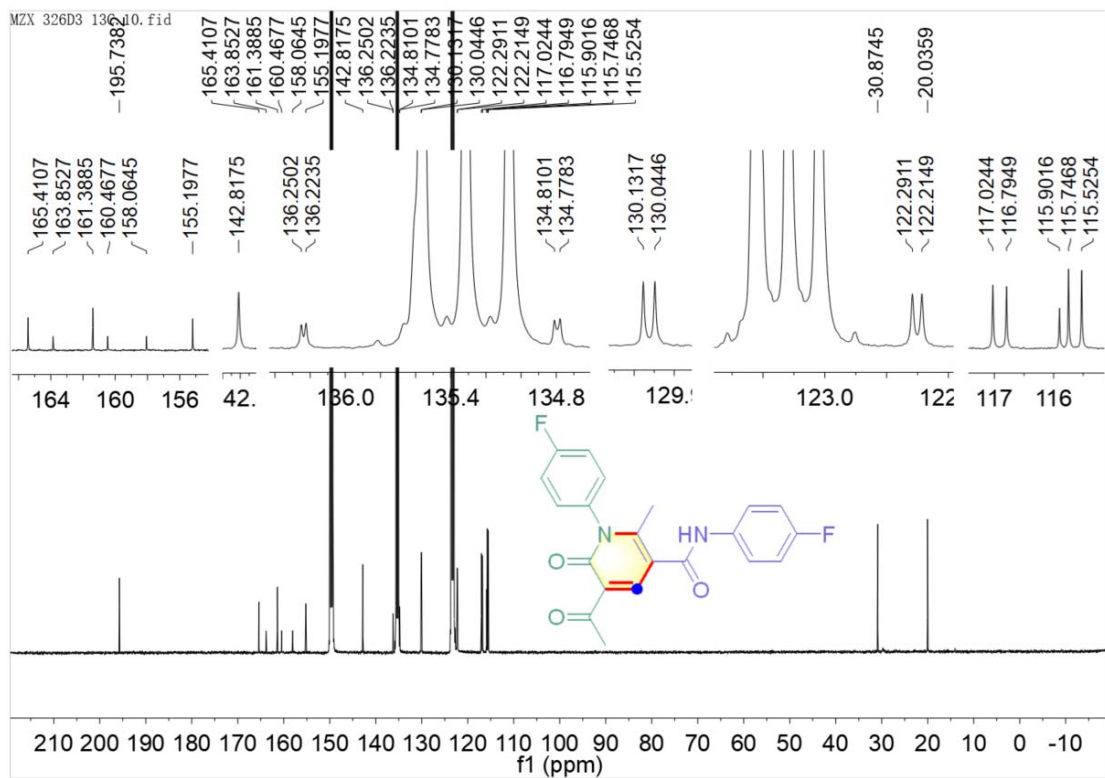

DEPT 90 and DEPT 135 (in pyridine-*d*<sub>5</sub>)

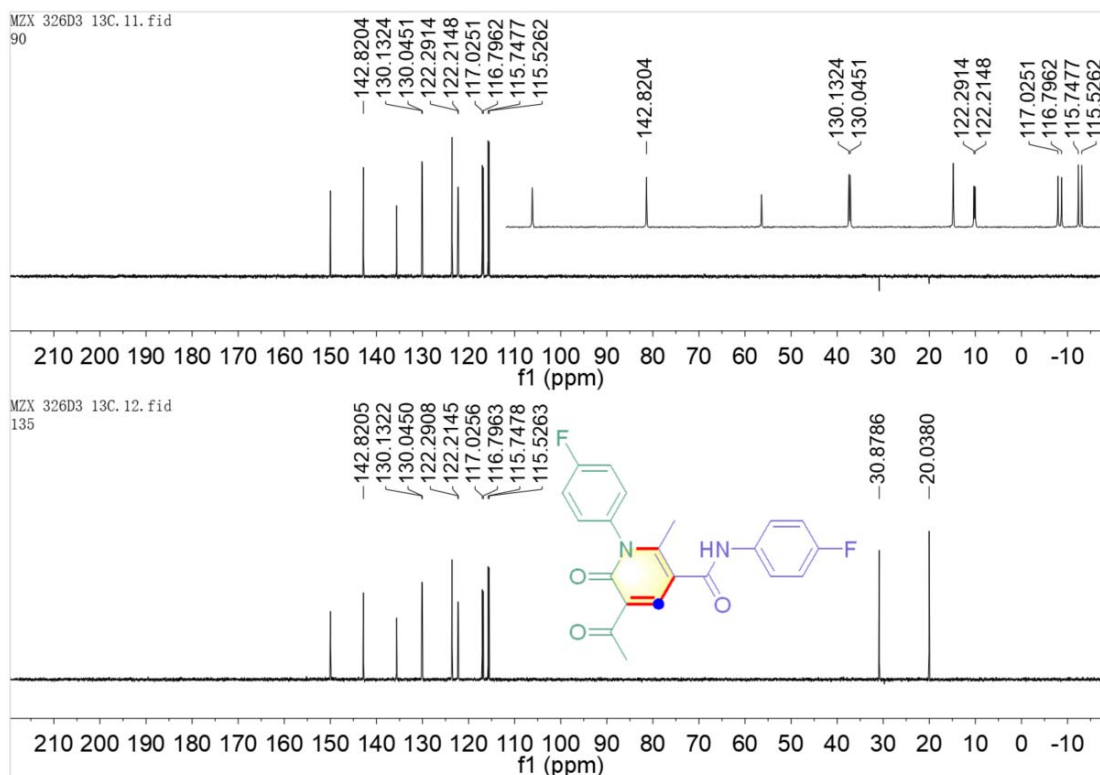

<sup>19</sup>F NMR (in pyridine-*d*<sub>5</sub>)

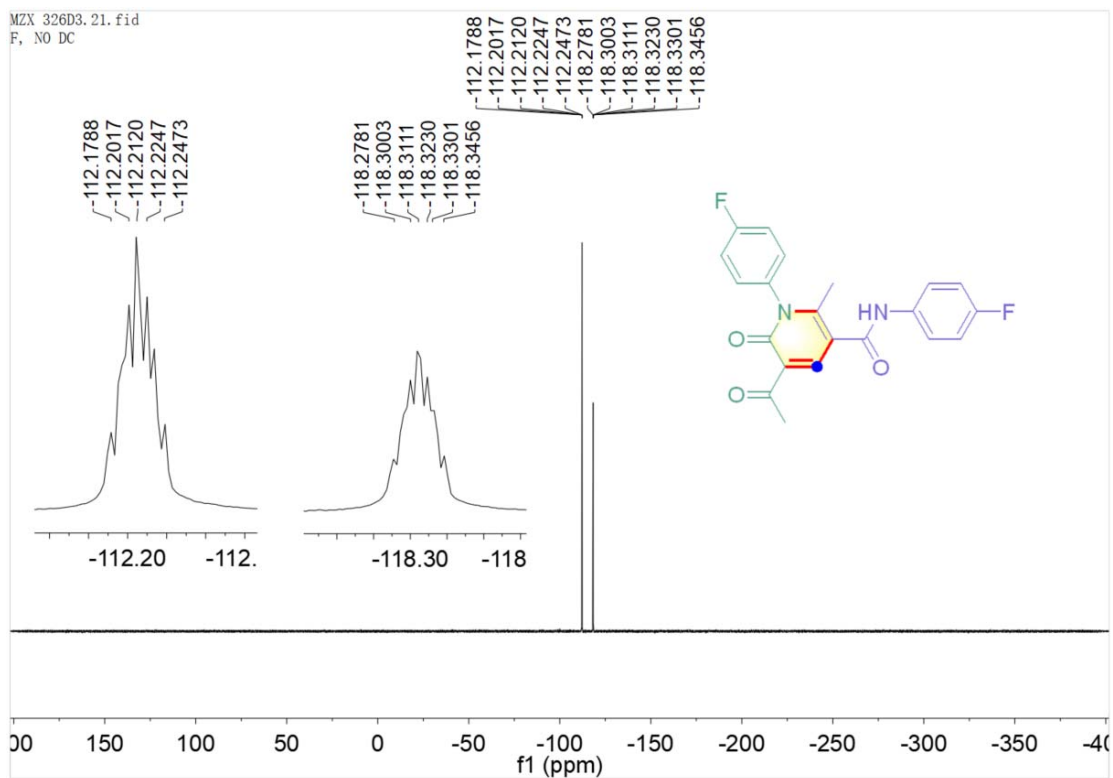

**2b5**,  $^1\text{H}$  NMR (in pyridine- $d_5$ )

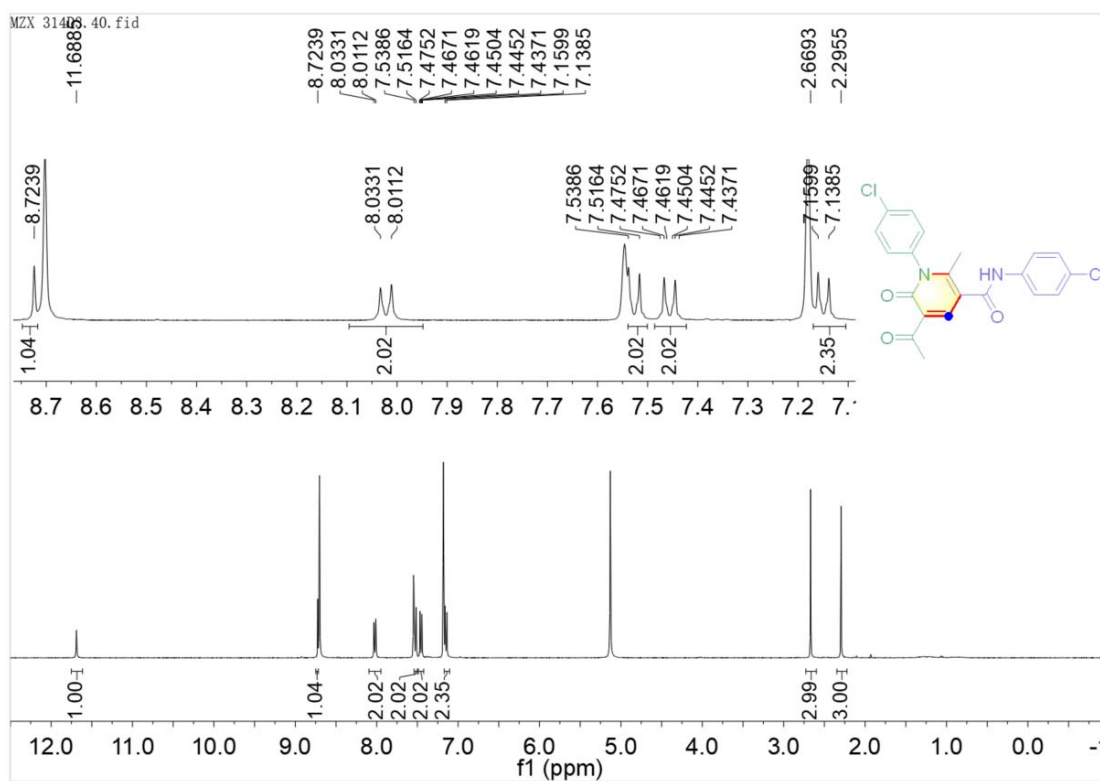

$^{13}\text{C}$  NMR (in pyridine- $d_5$ )

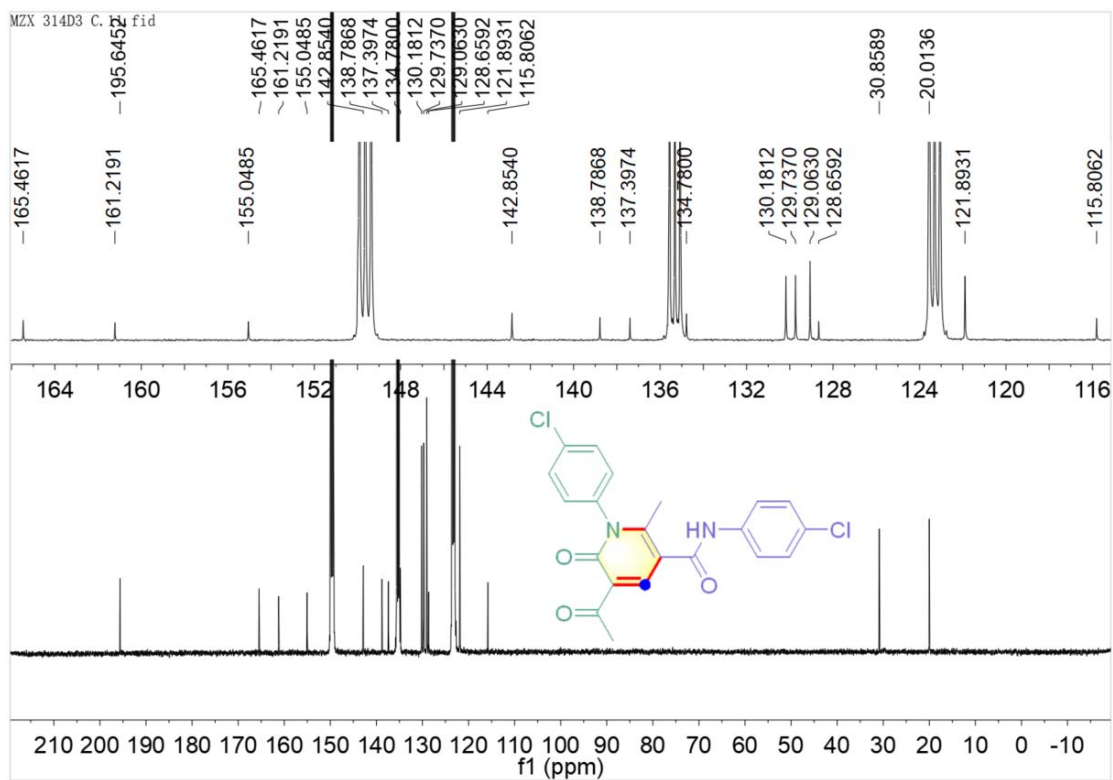

# DEPT 90 and DEPT 135 (in pyridine-*d*<sub>5</sub>)

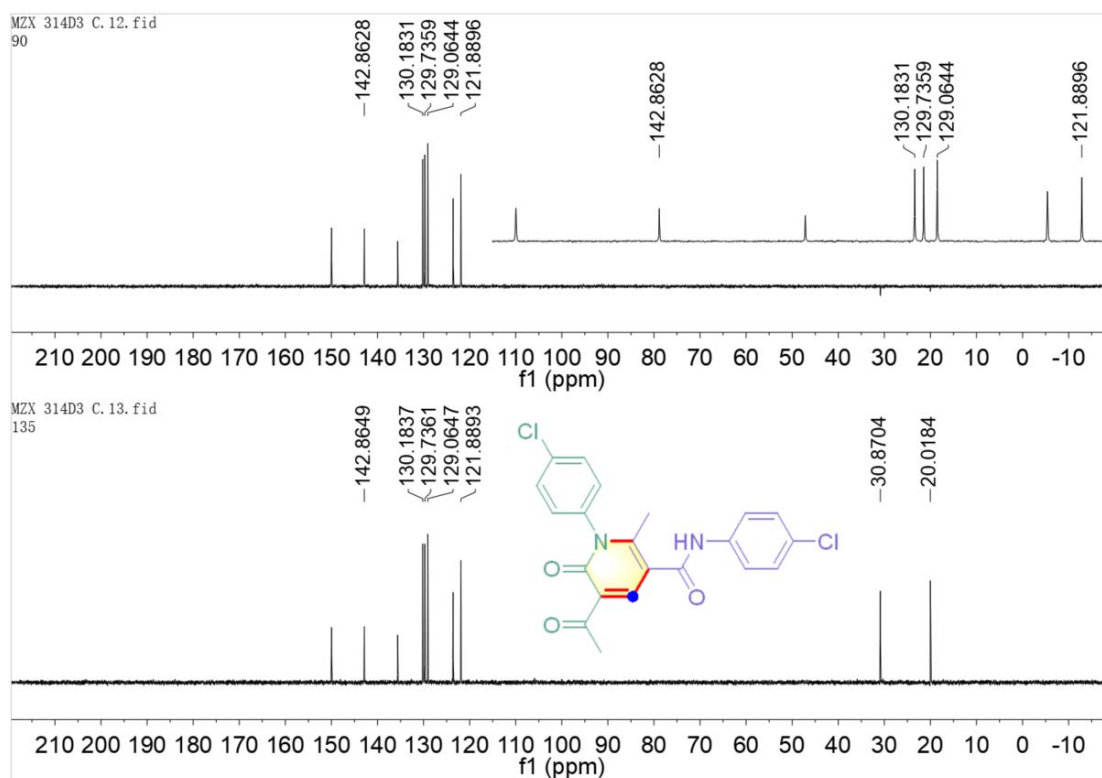

## 2b6, <sup>1</sup>H NMR

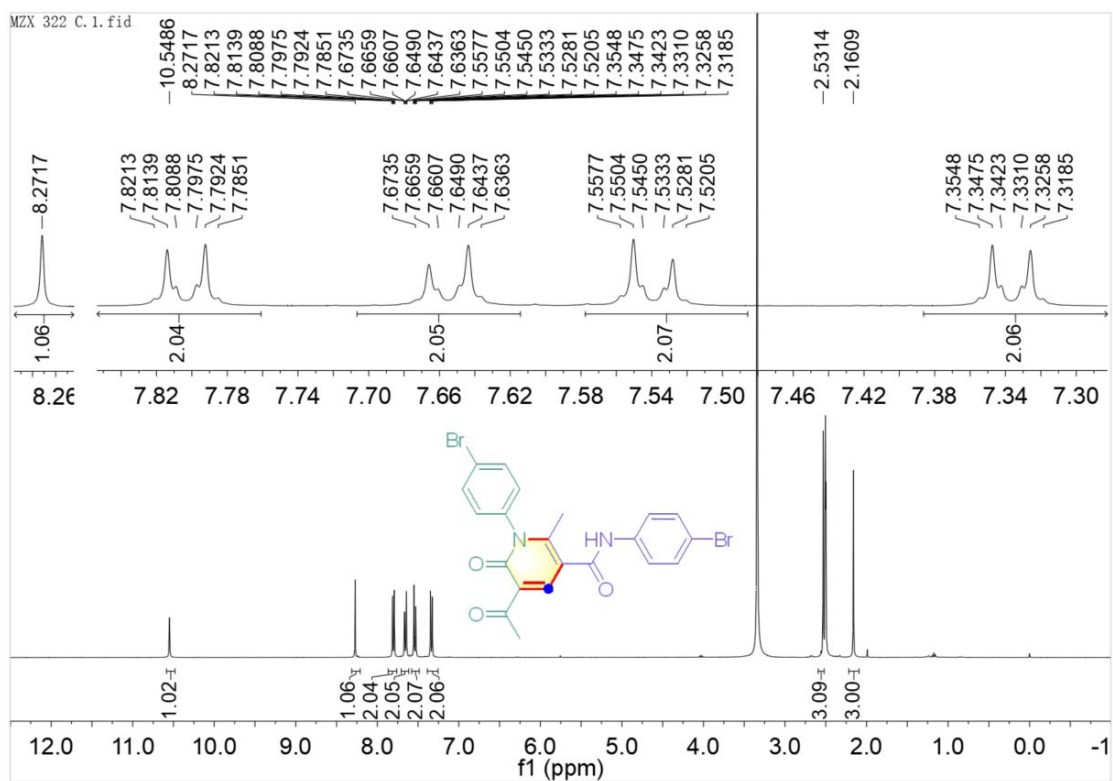

## <sup>13</sup>C NMR

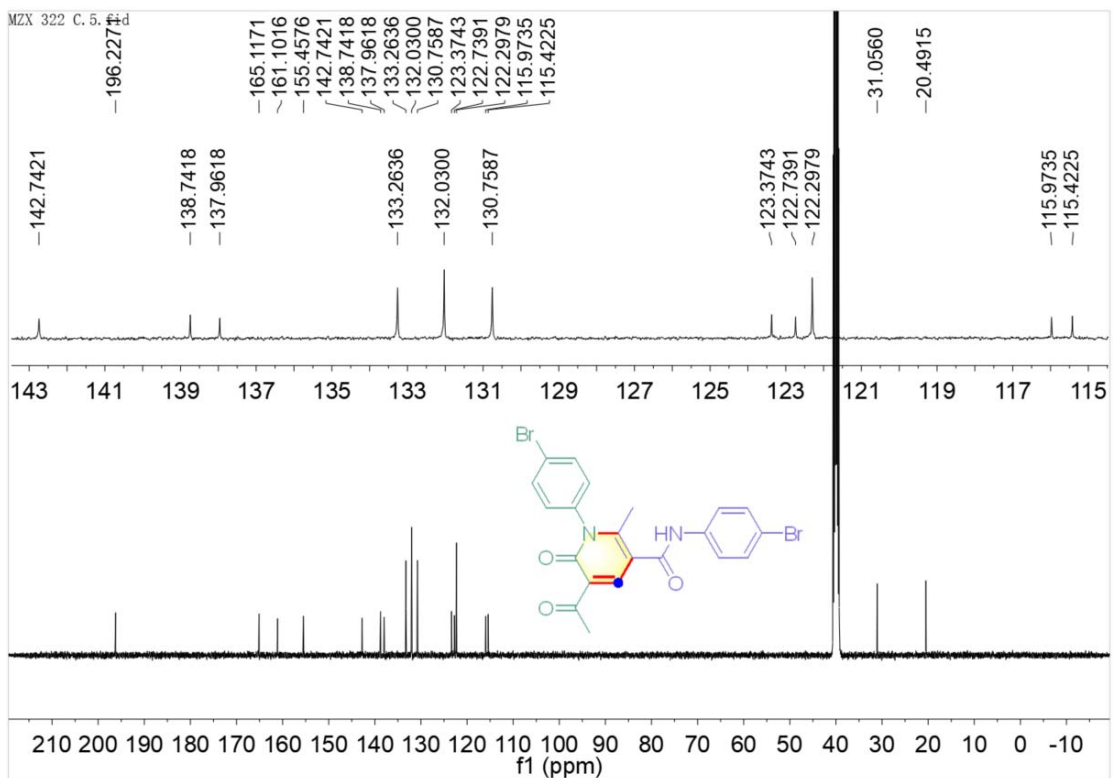



# DEPT 90 and DEPT 135

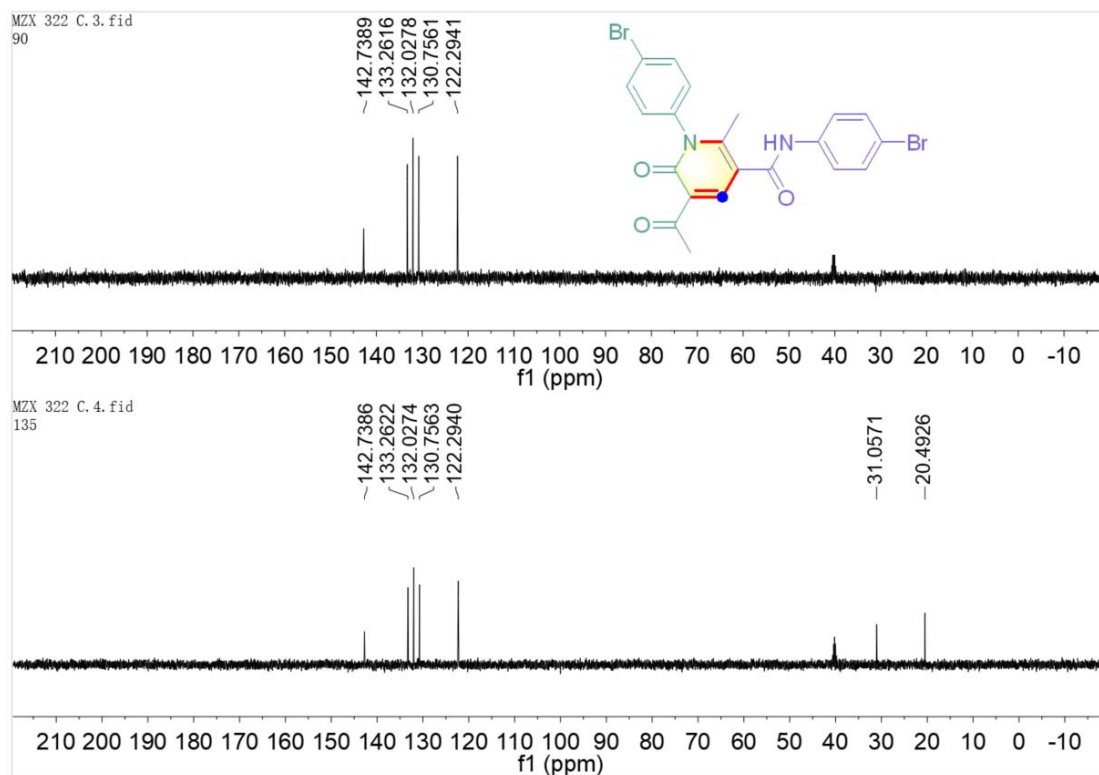

**2b7**,  $^1\text{H}$  NMR (in pyridine- $d_5$ )

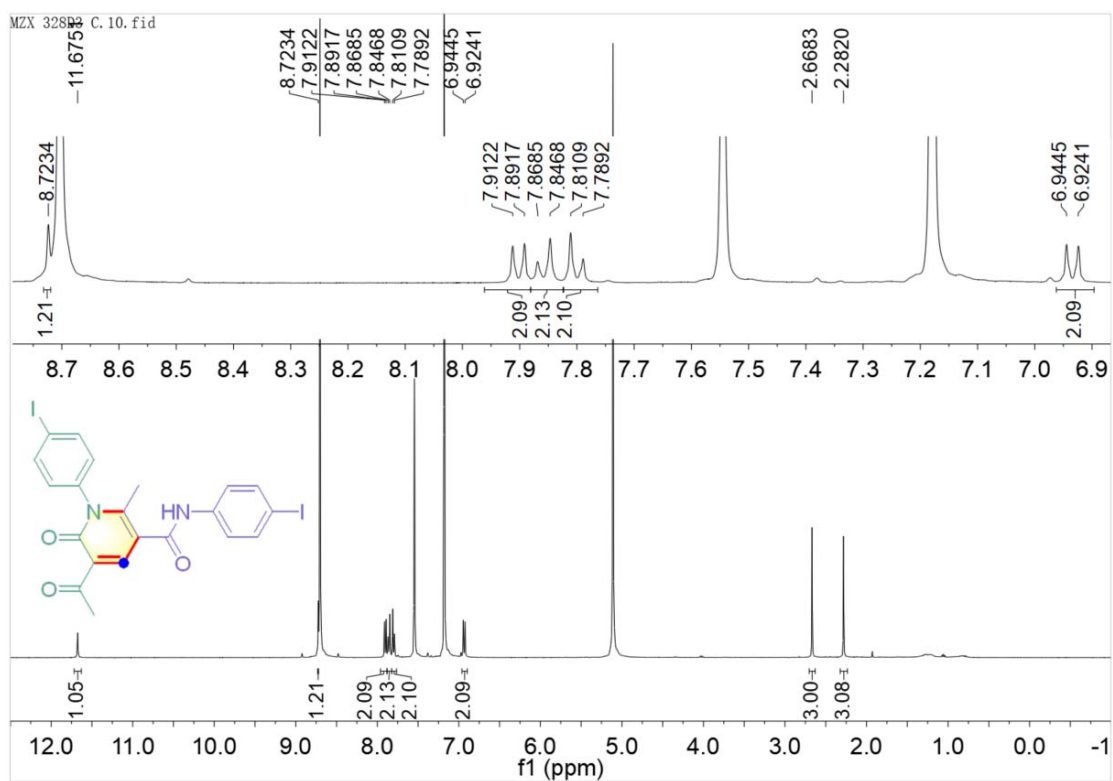

$^{13}\text{C}$  NMR (in pyridine- $d_5$ )

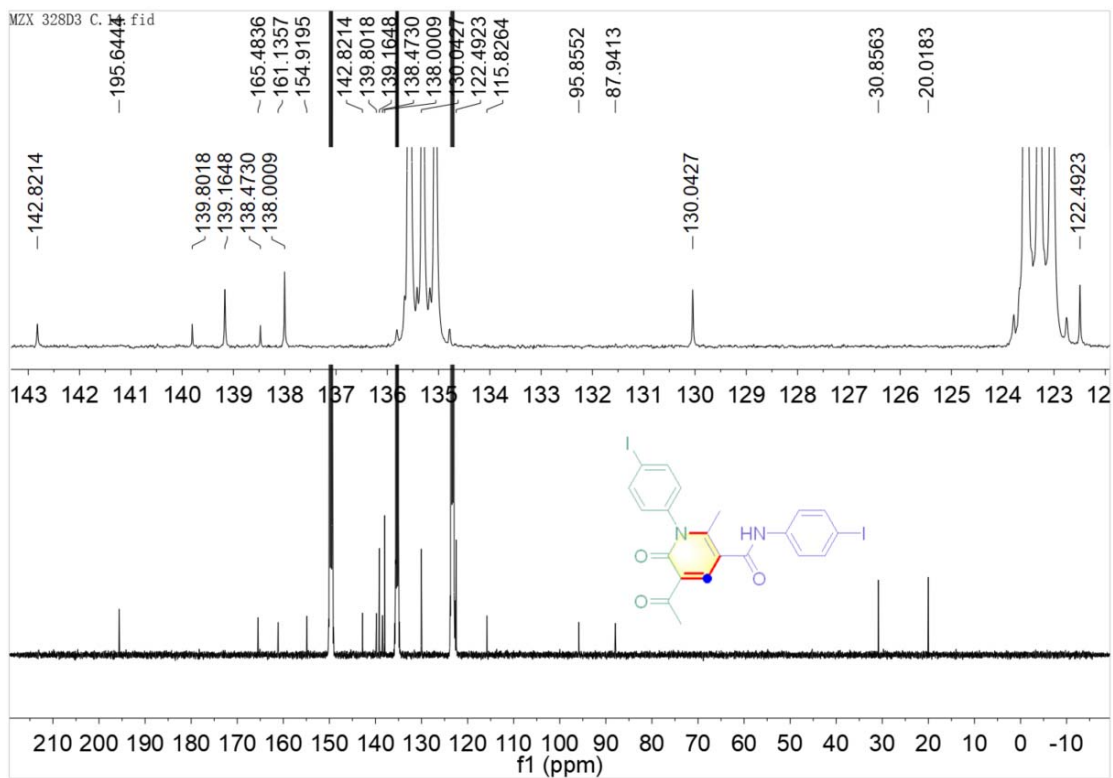

# DEPT 90 and DEPT 135 (in pyridine-*d*<sub>5</sub>)

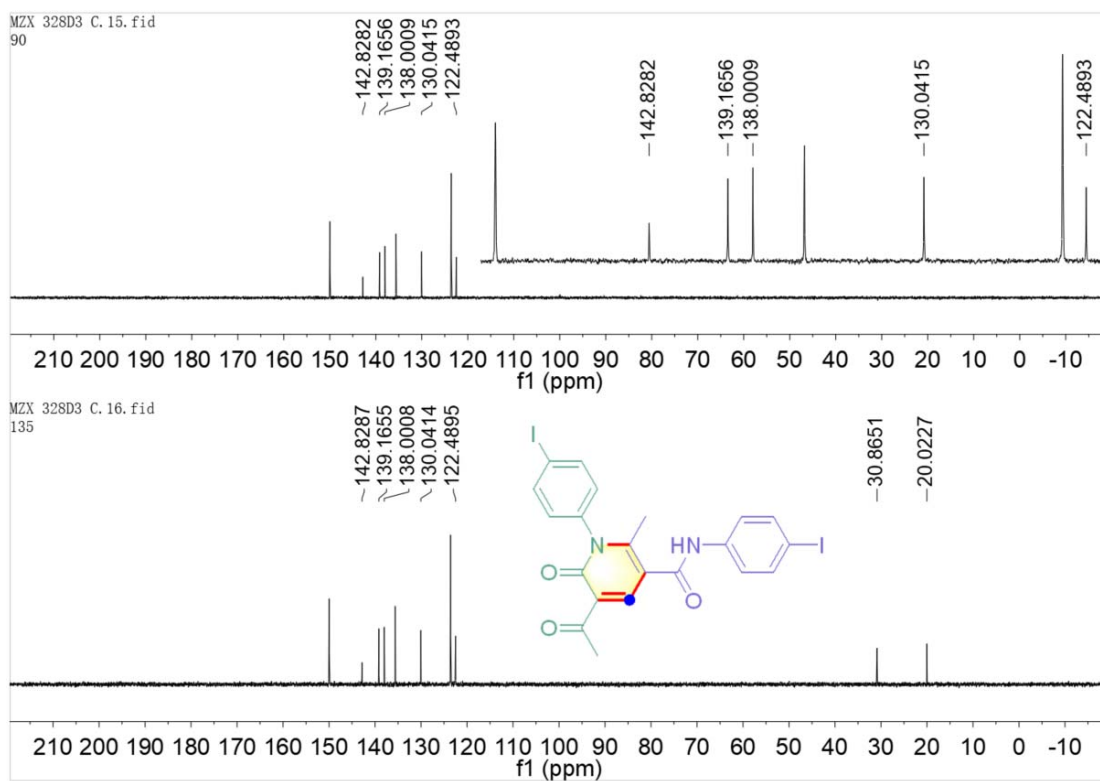

### 2b8, <sup>1</sup>H NMR

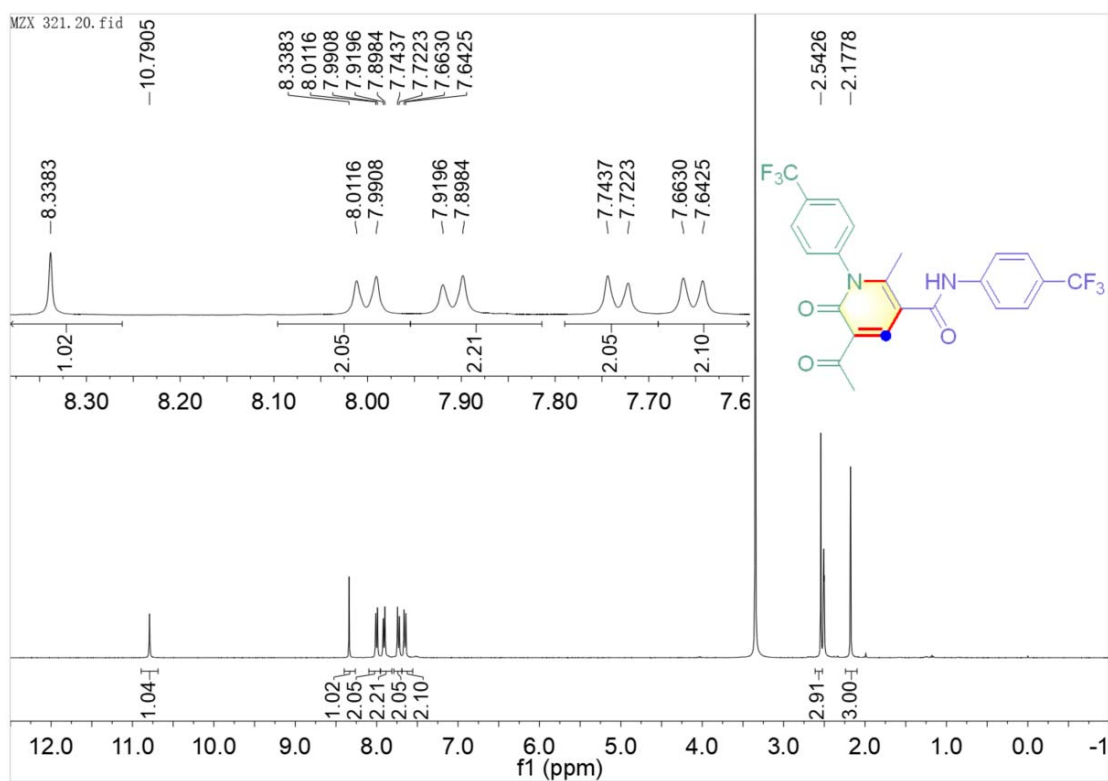

### <sup>13</sup>C NMR

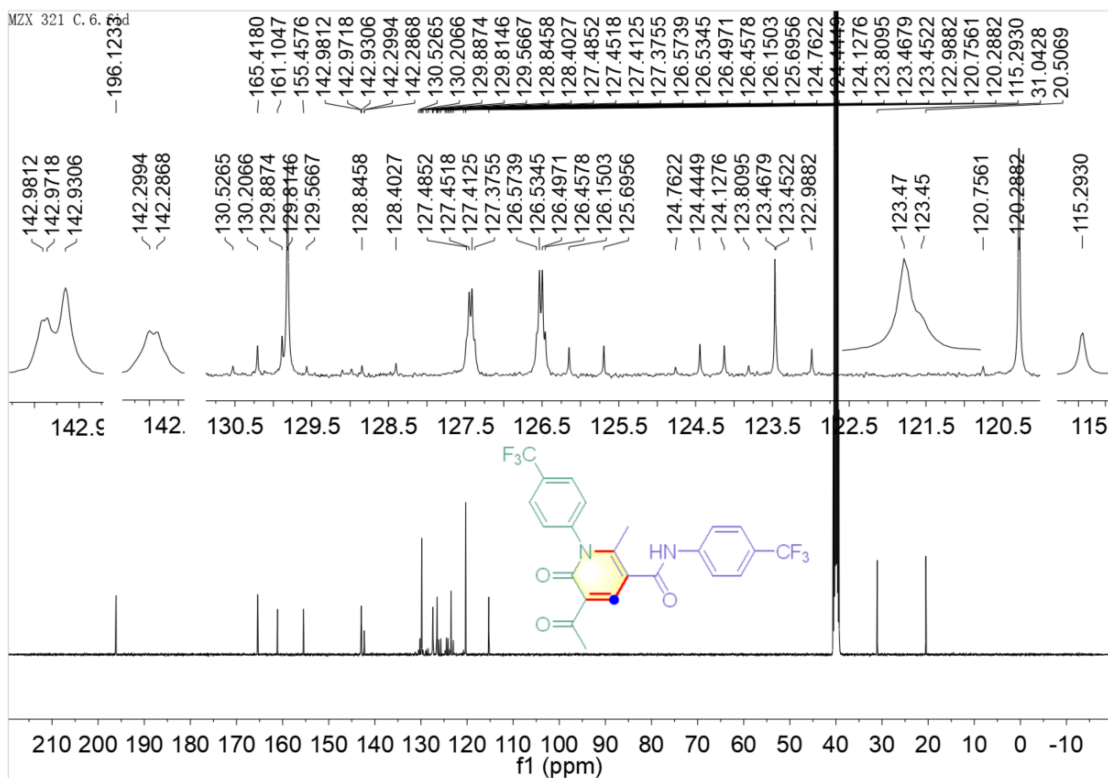

### DEPT 90 and DEPT 135

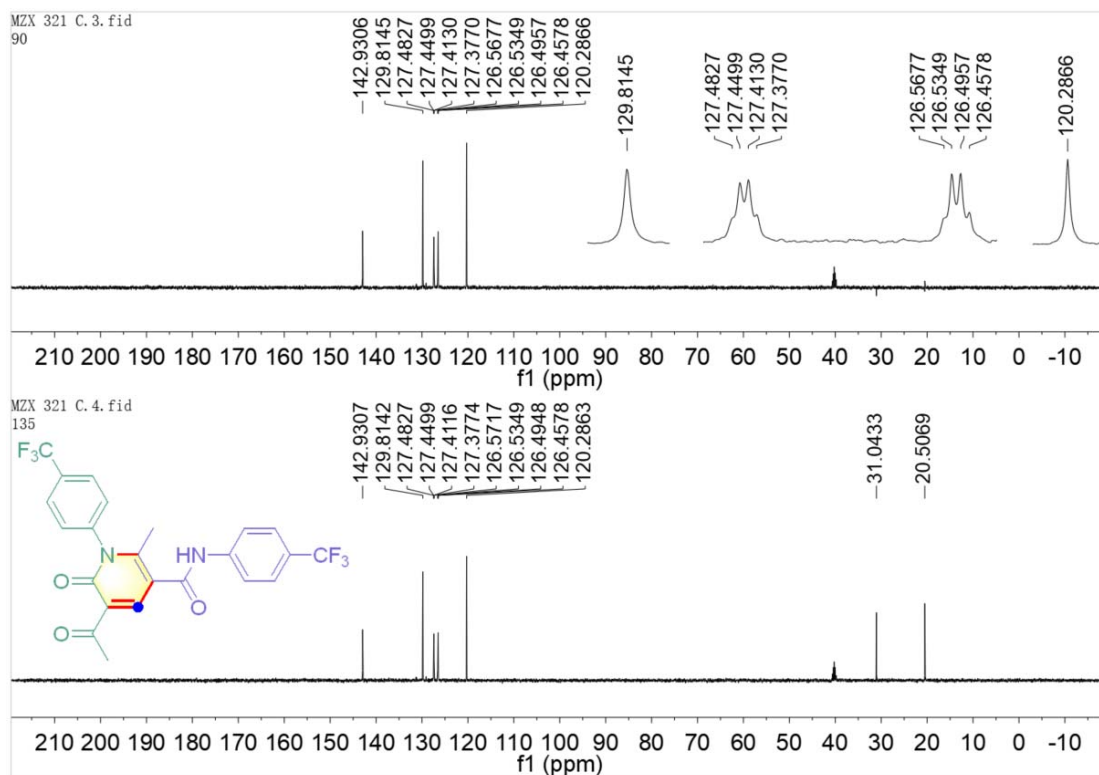

### <sup>19</sup>F NMR

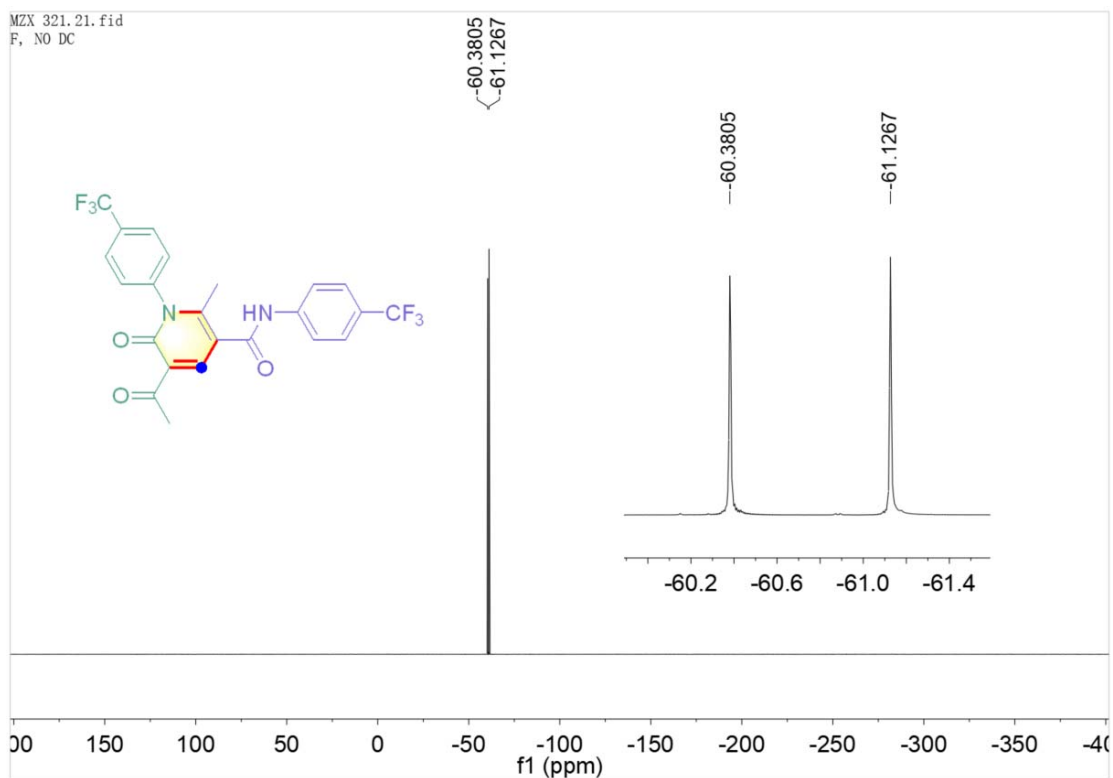

## 2b9, <sup>1</sup>H NMR

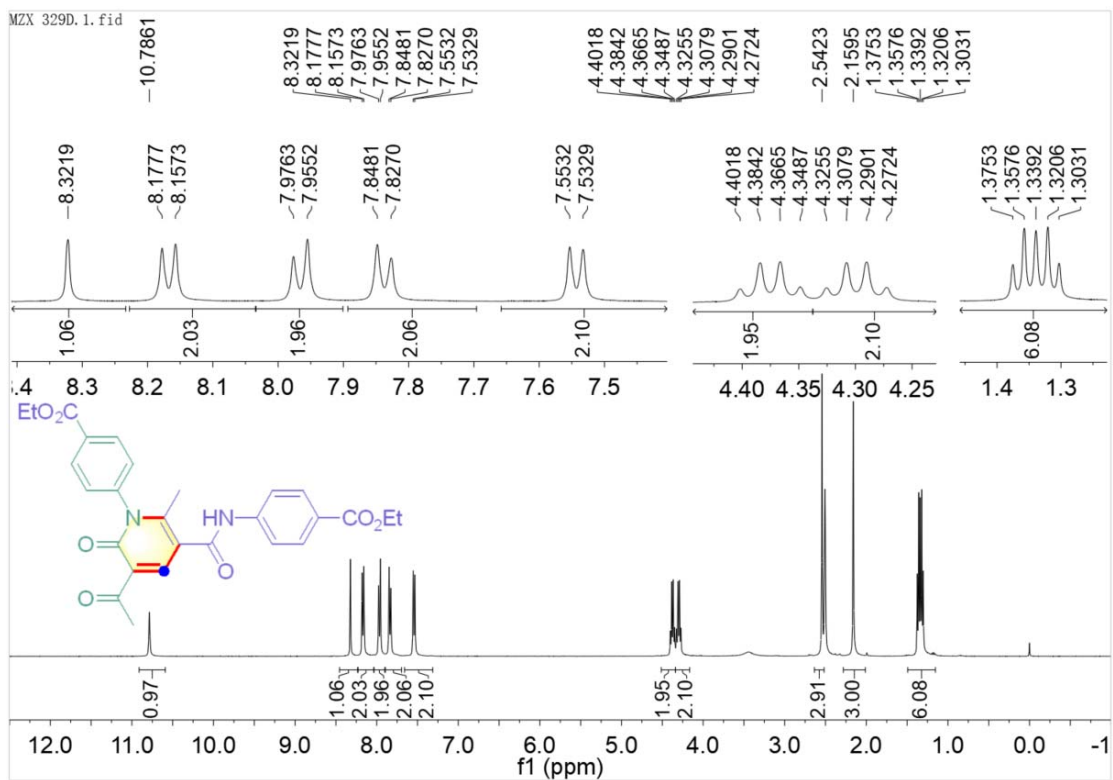

## <sup>13</sup>C NMR

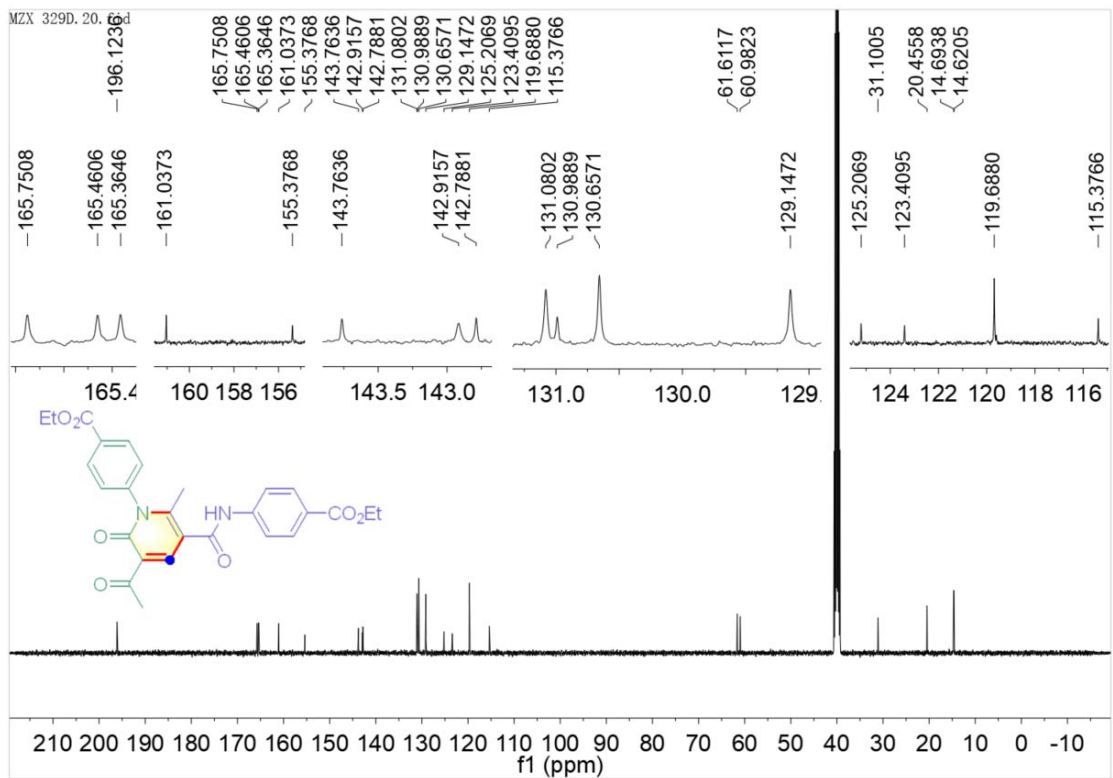

# DEPT 90 and DEPT 135

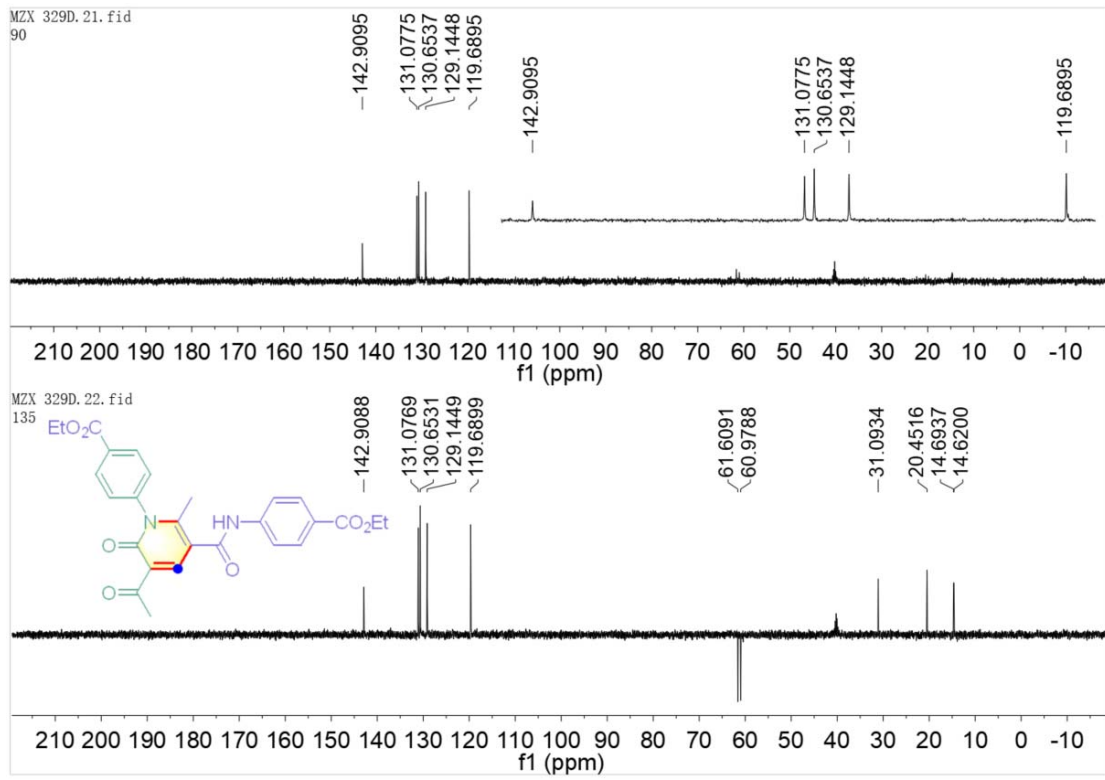

## 2b10, <sup>1</sup>H NMR

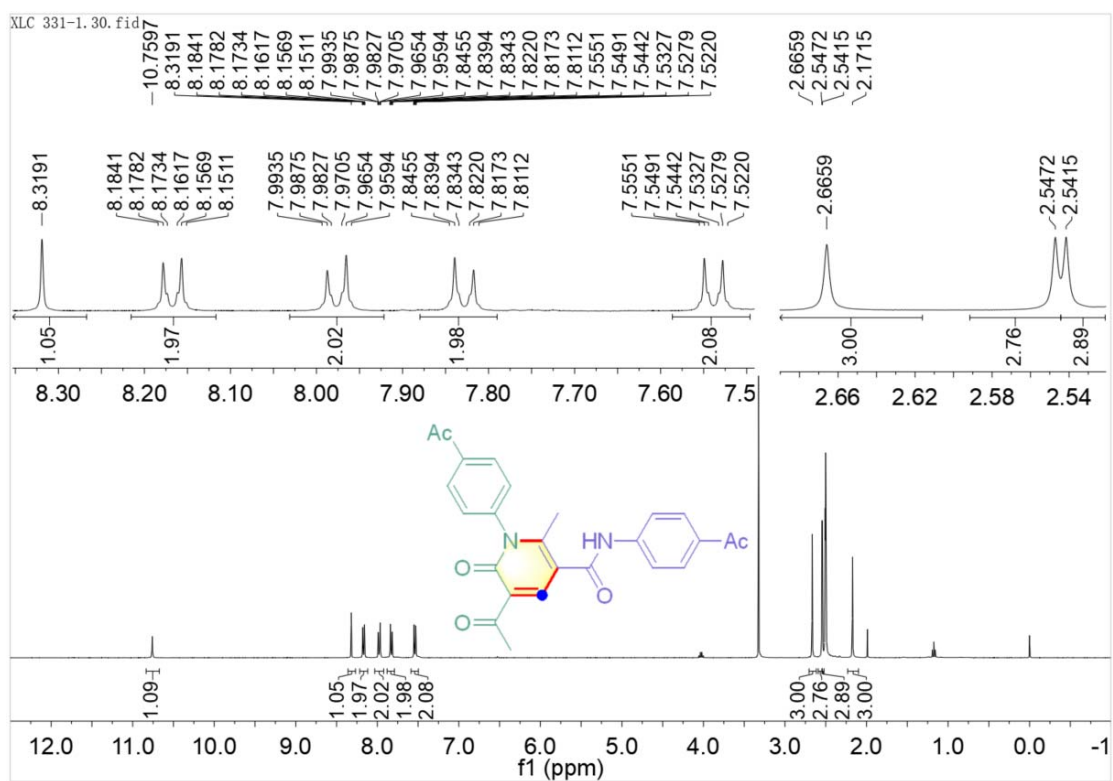

## <sup>13</sup>C NMR

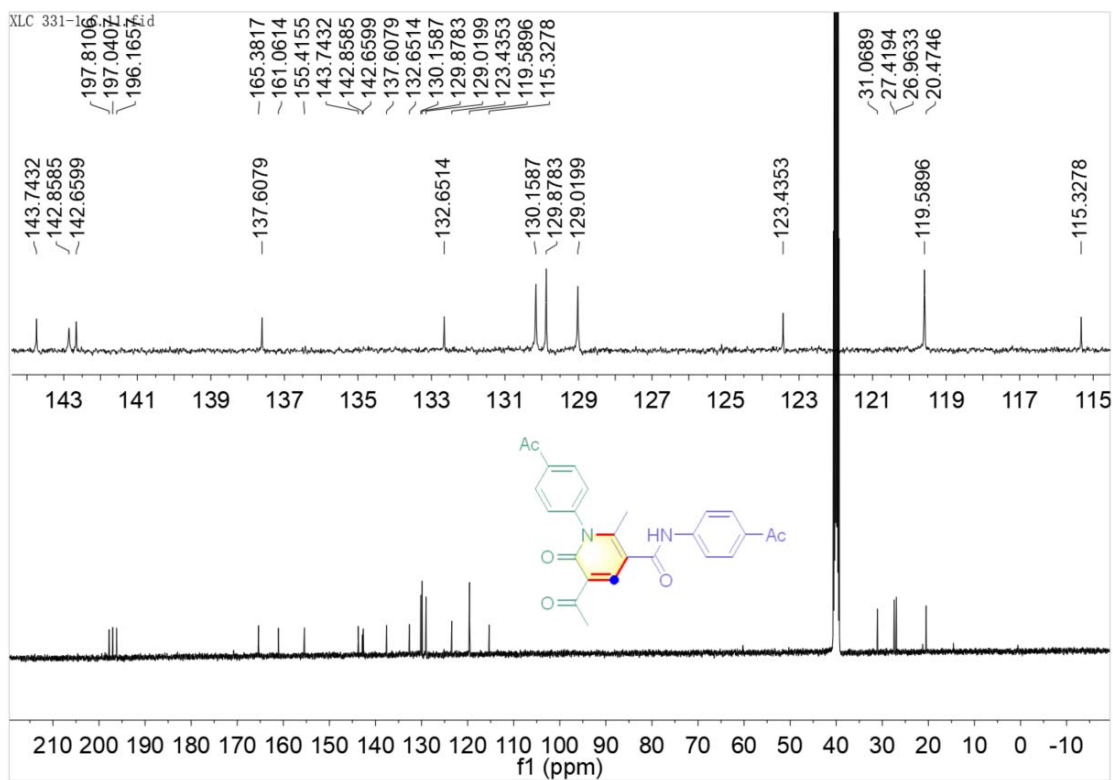



# DEPT 90 and DEPT 135

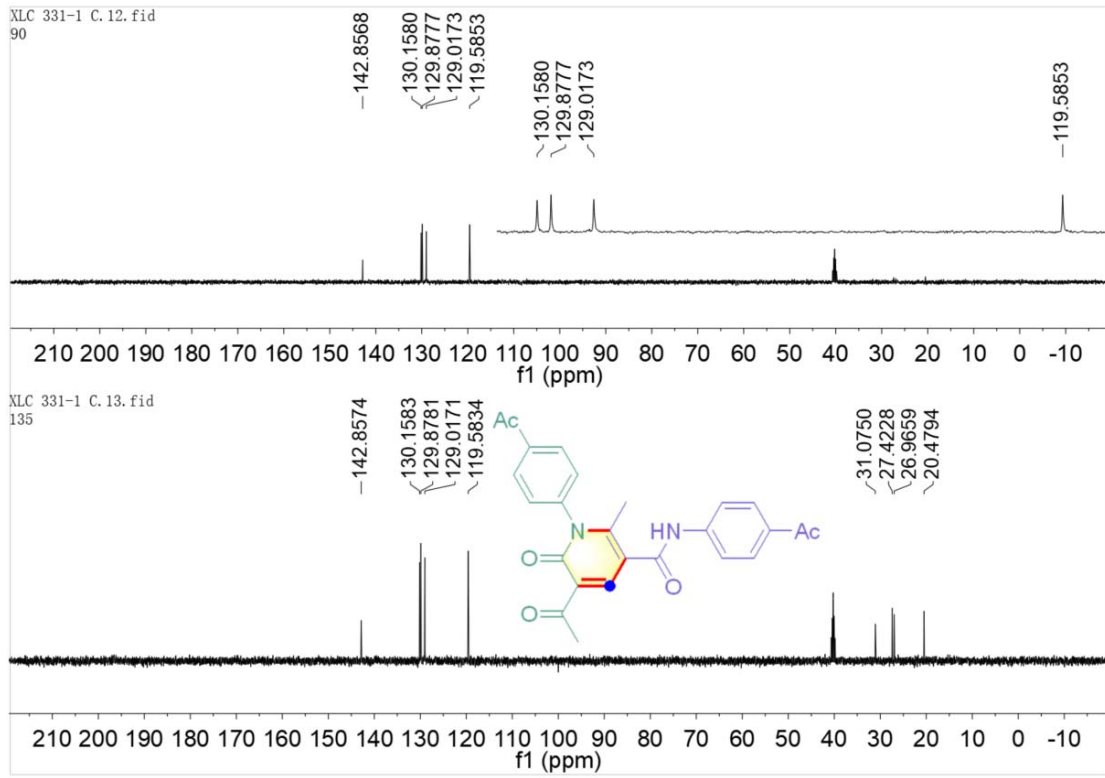

2c1, <sup>1</sup>H NMR

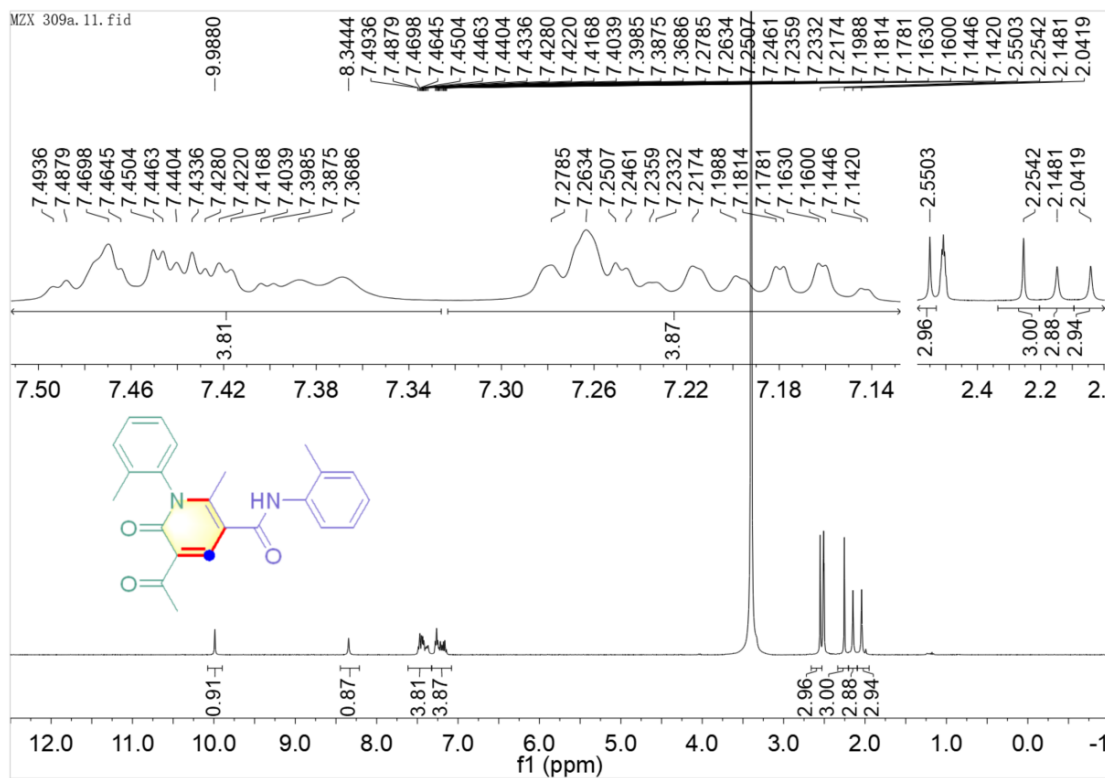

<sup>13</sup>C NMR

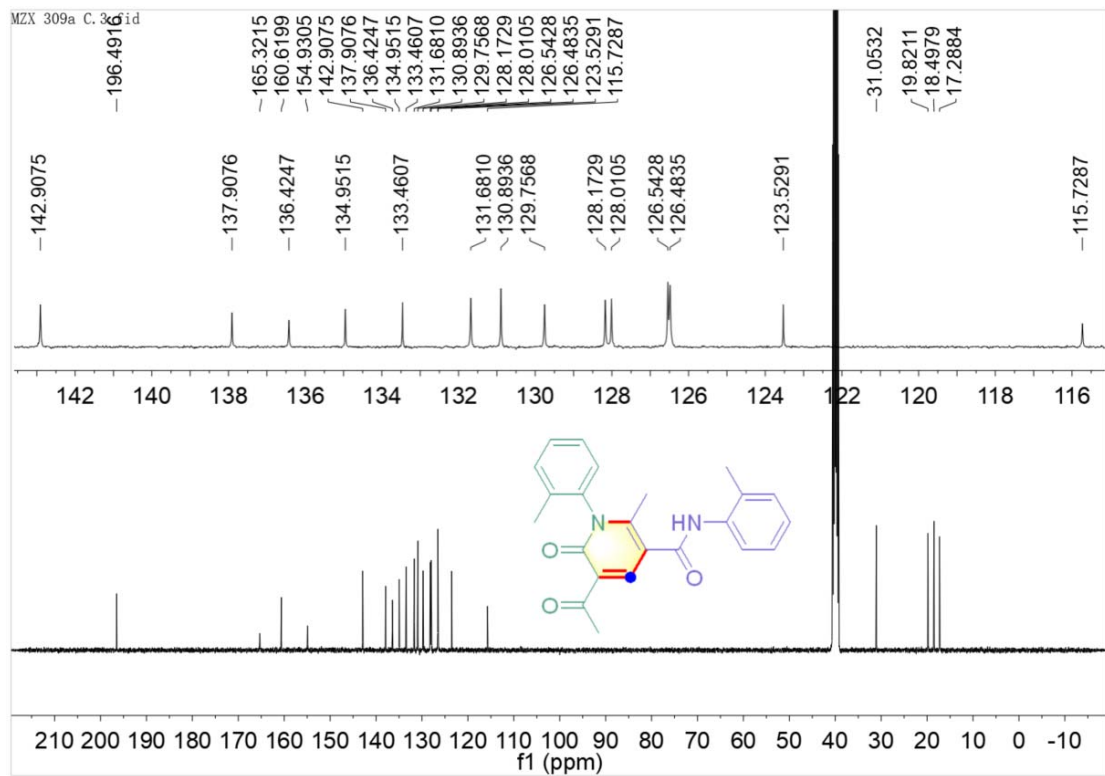

# DEPT 90 and DEPT 135

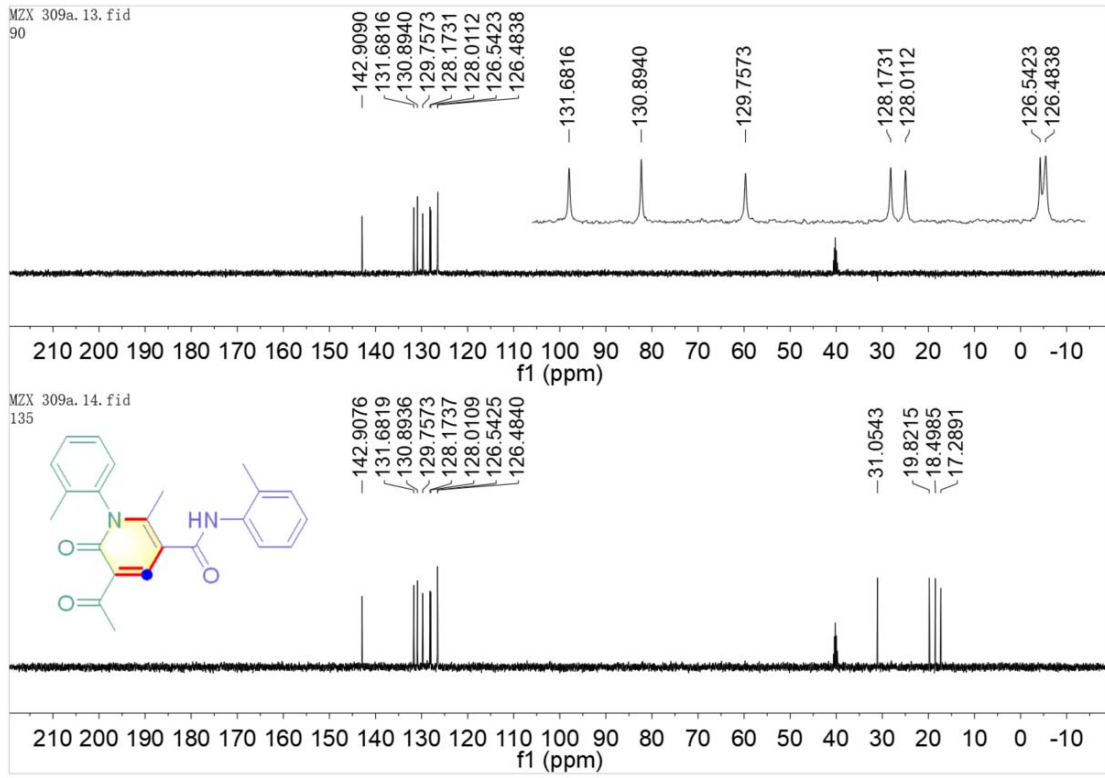

## 2c2, <sup>1</sup>H NMR

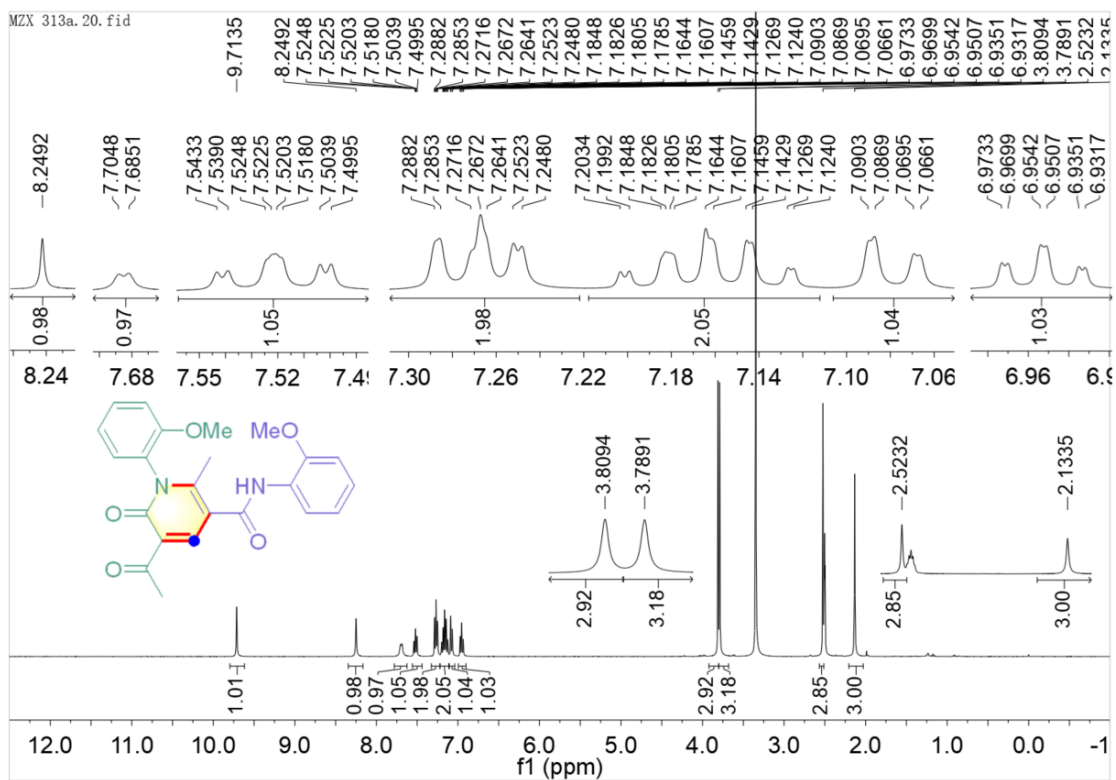

## <sup>13</sup>C NMR

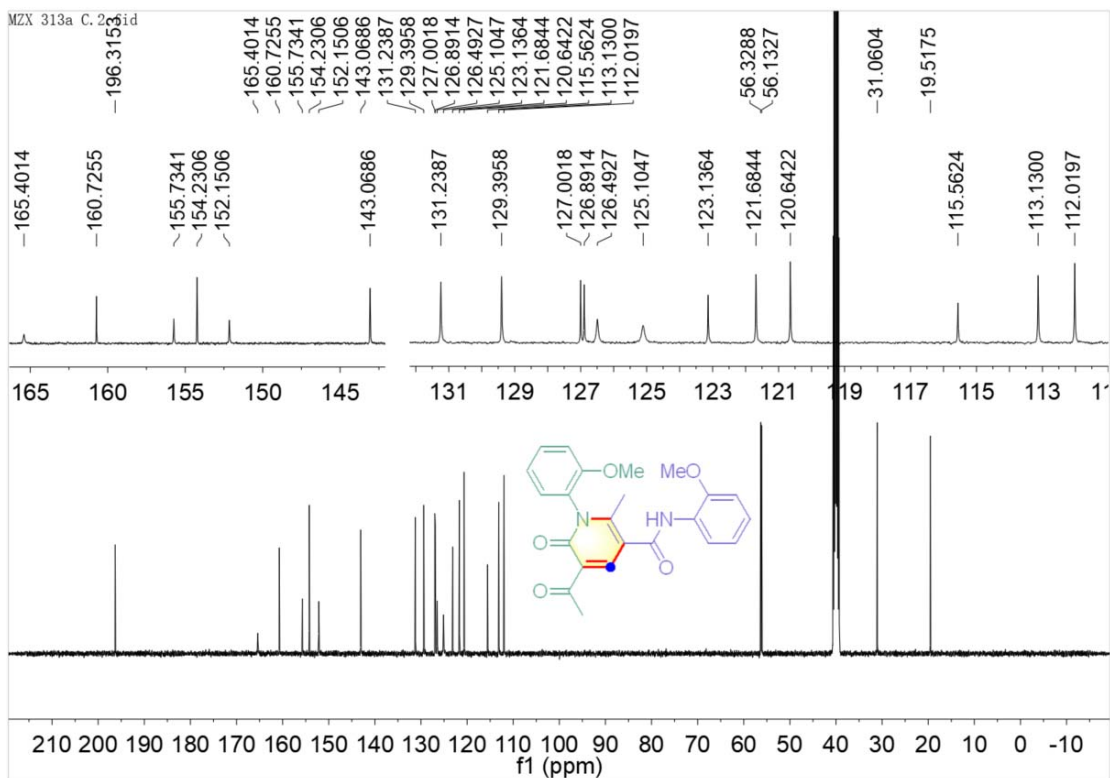

# DEPT 90 and DEPT 135

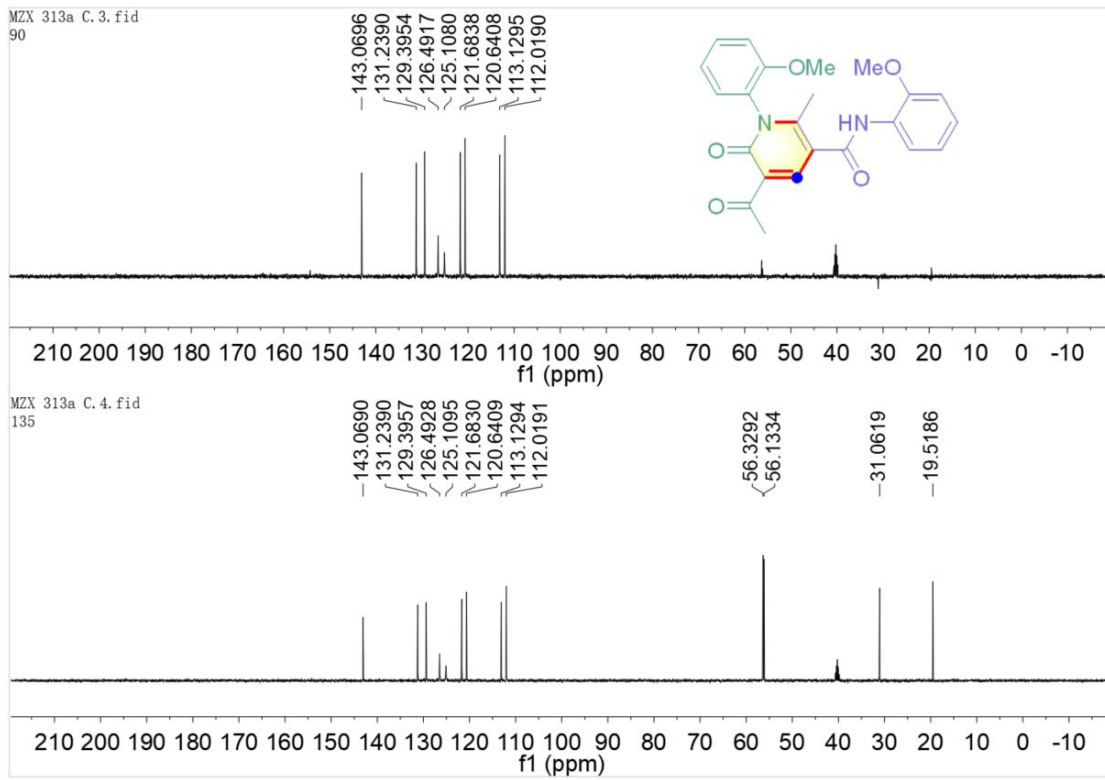

### 2c3, <sup>1</sup>H NMR

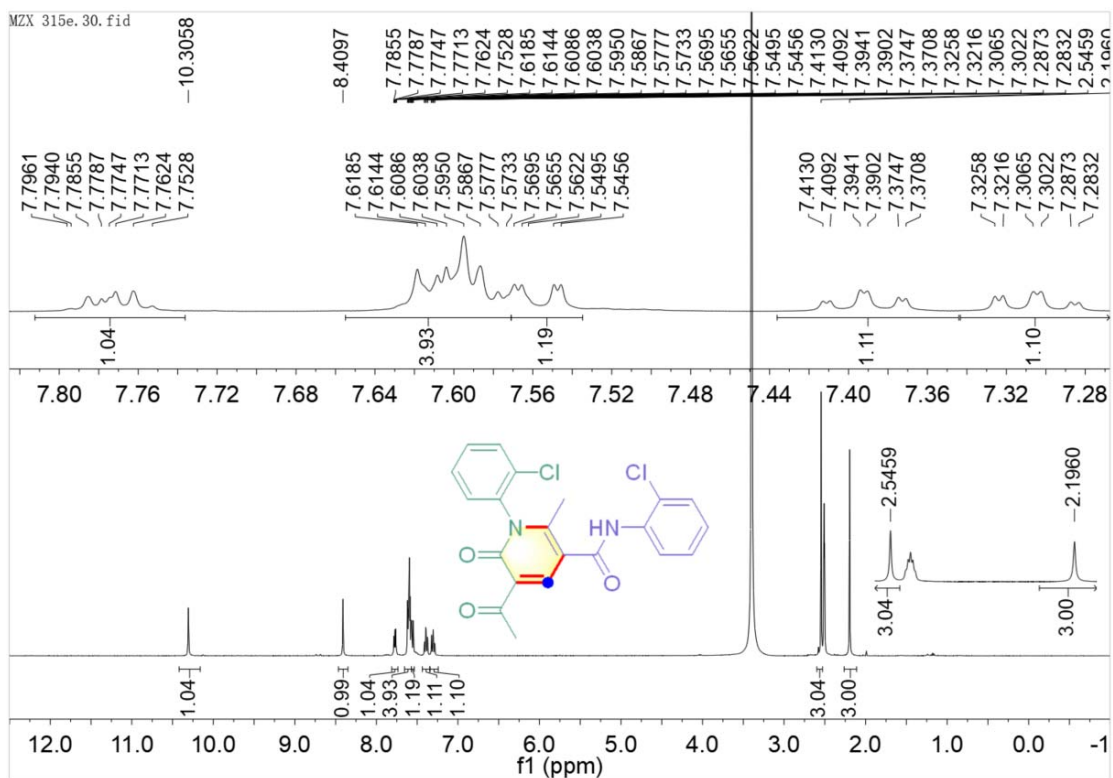

### <sup>13</sup>C NMR

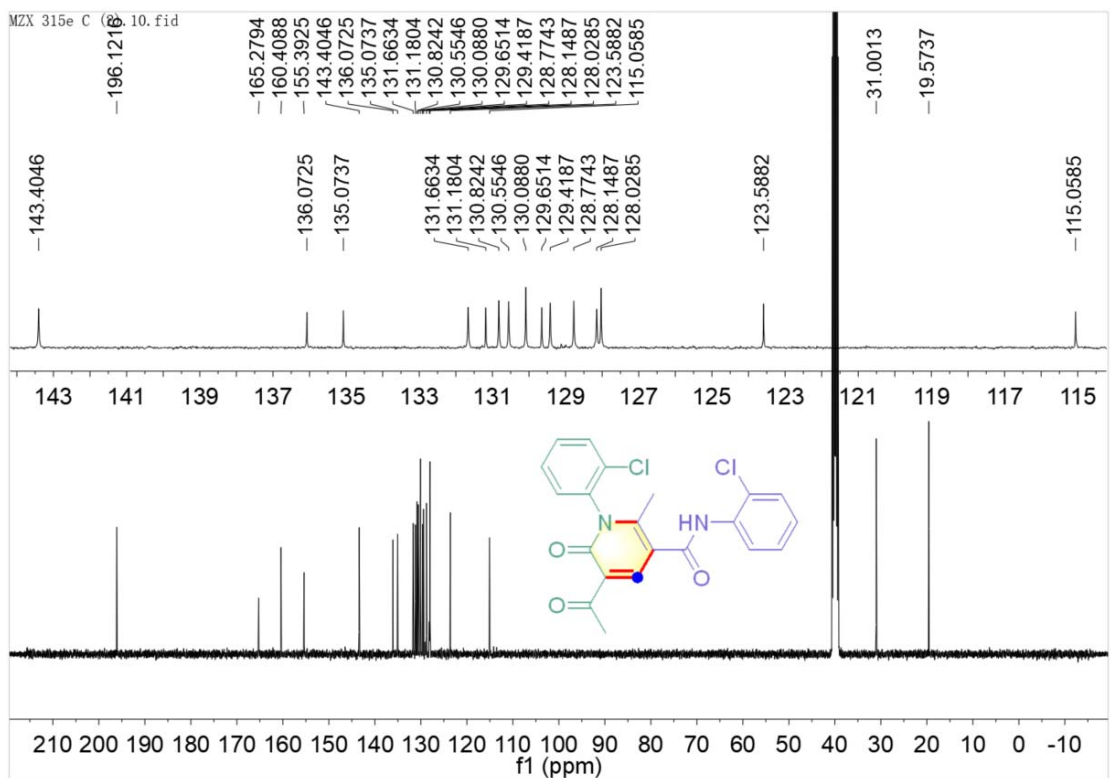

# DEPT 90 and DEPT 135

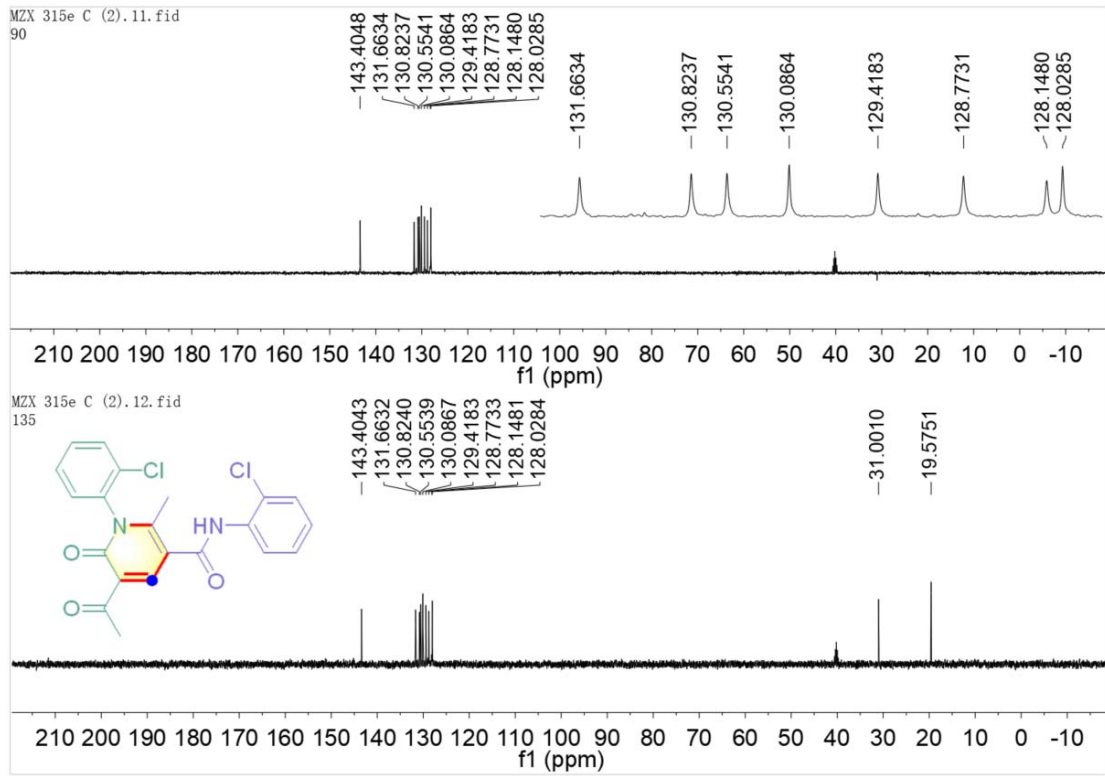

2d1, <sup>1</sup>H NMR (in pyridine-*d*<sub>5</sub>)

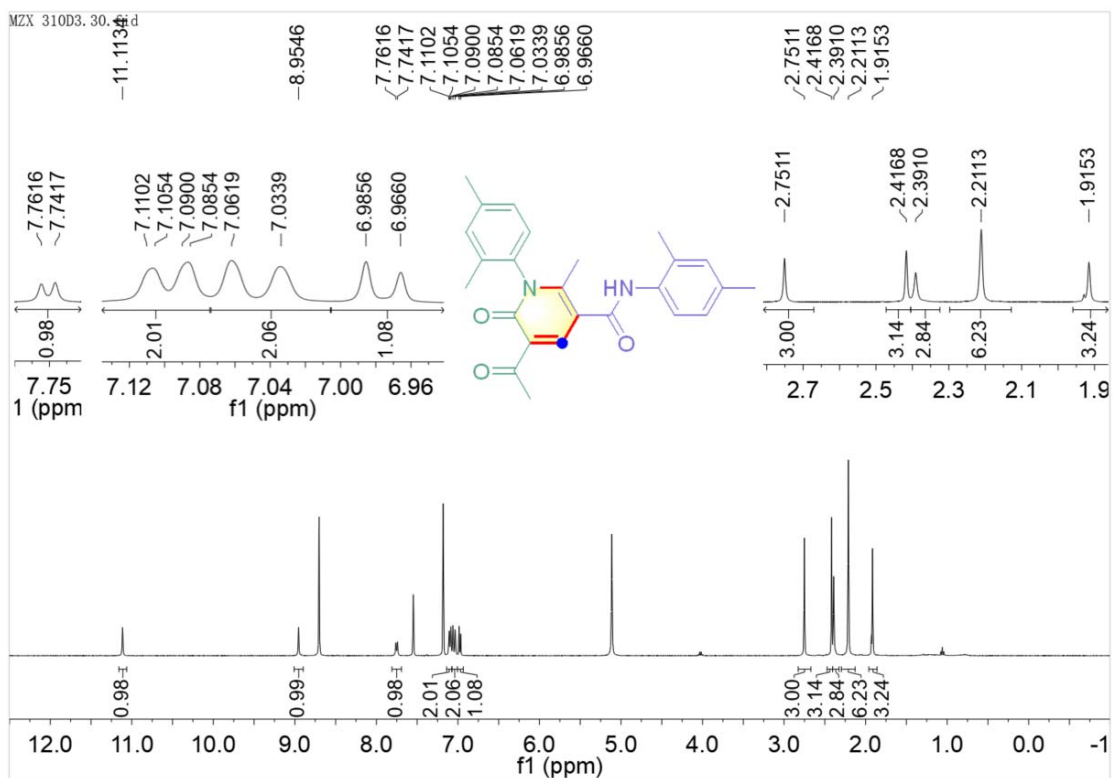

<sup>13</sup>C NMR (in pyridine-*d*<sub>5</sub>)

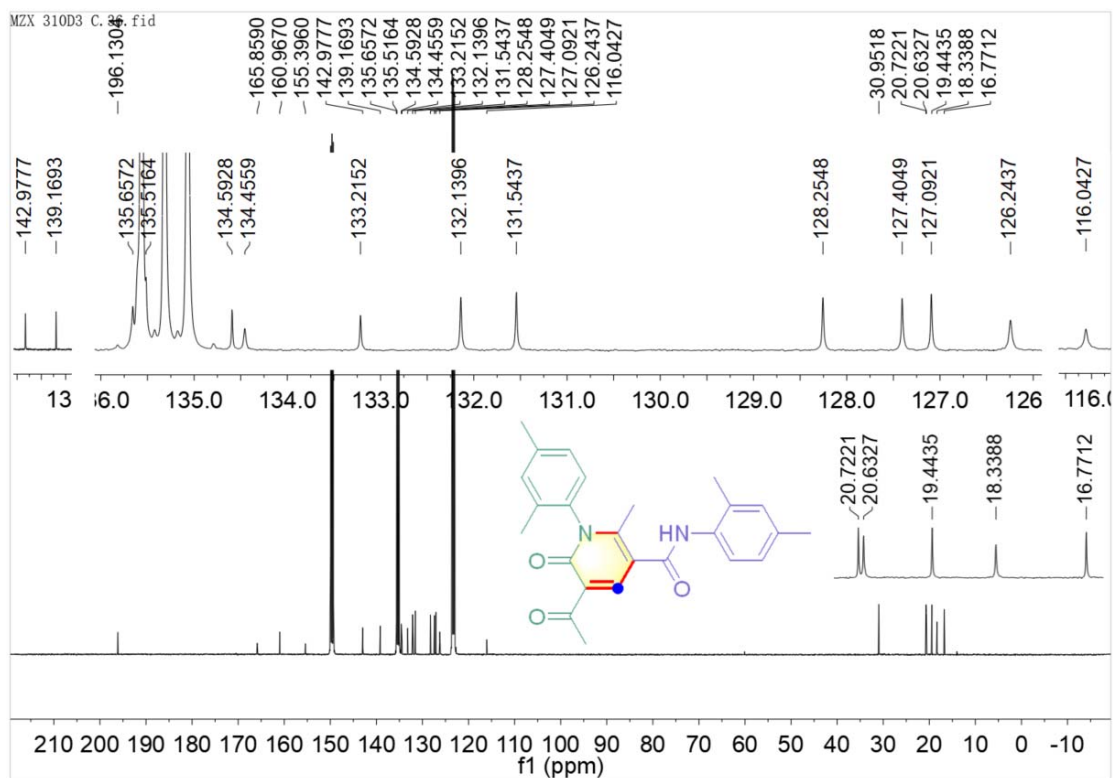



# DEPT 90 and DEPT 135 (in pyridine-*d*<sub>5</sub>)

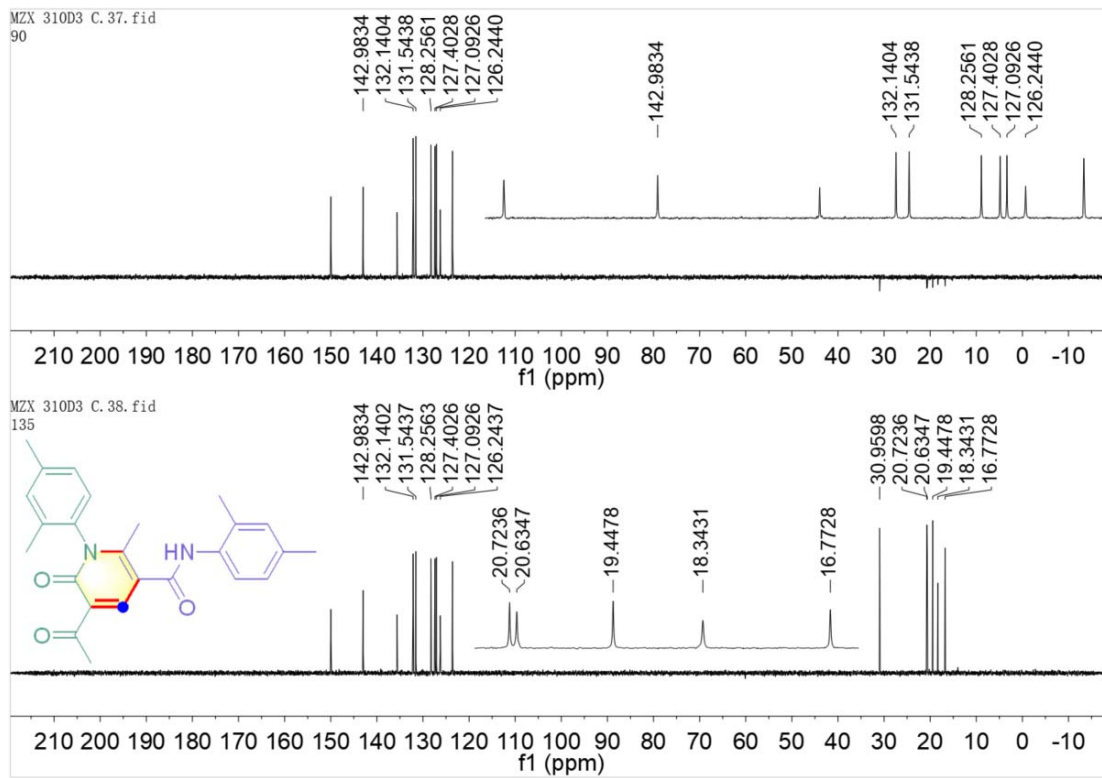

## 2d2, <sup>1</sup>H NMR

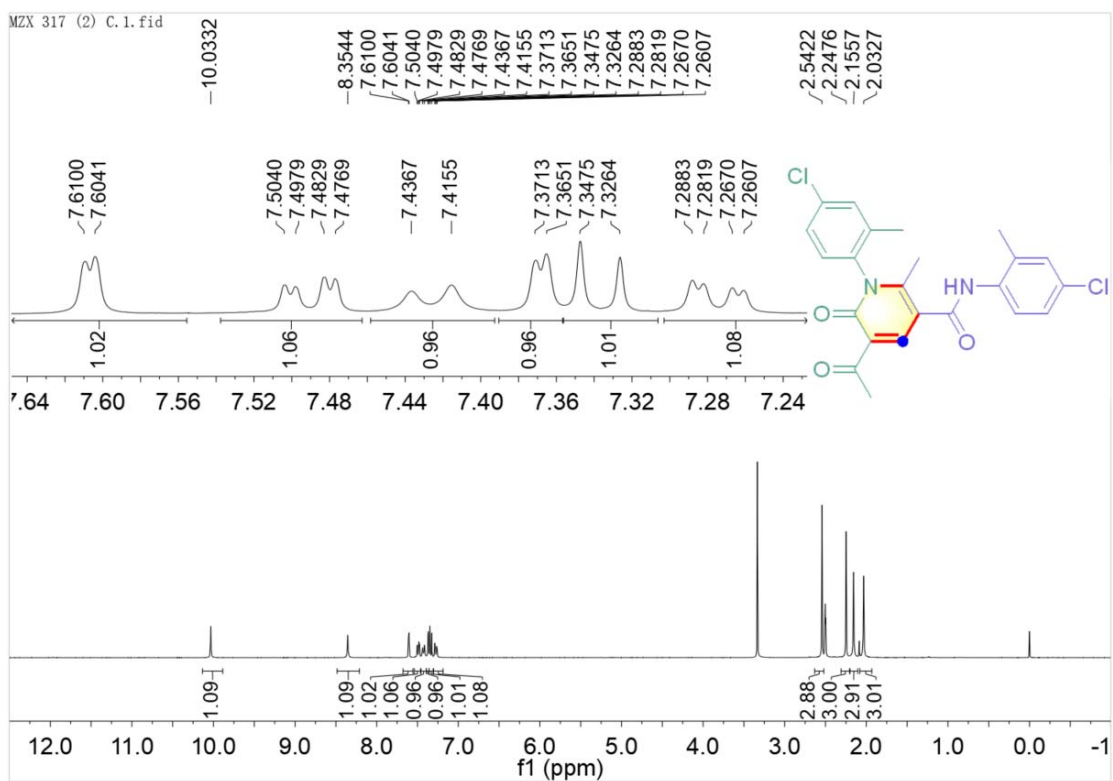

## <sup>13</sup>C NMR

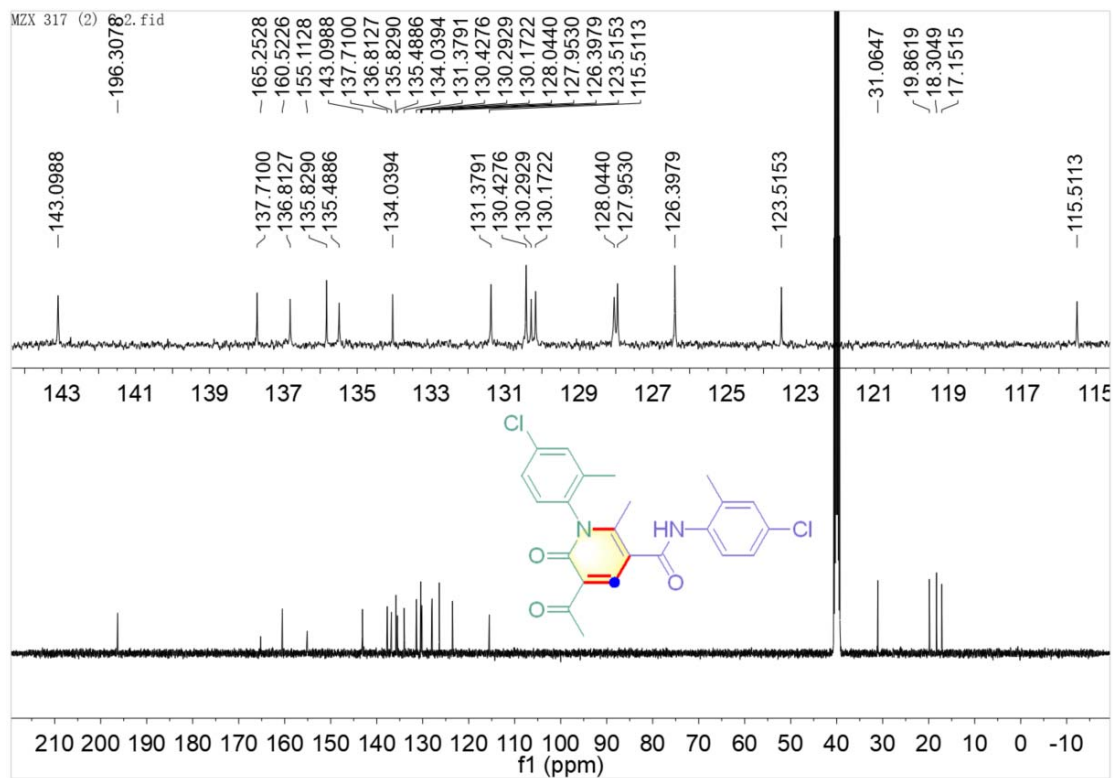

# DEPT 90 and DEPT 135

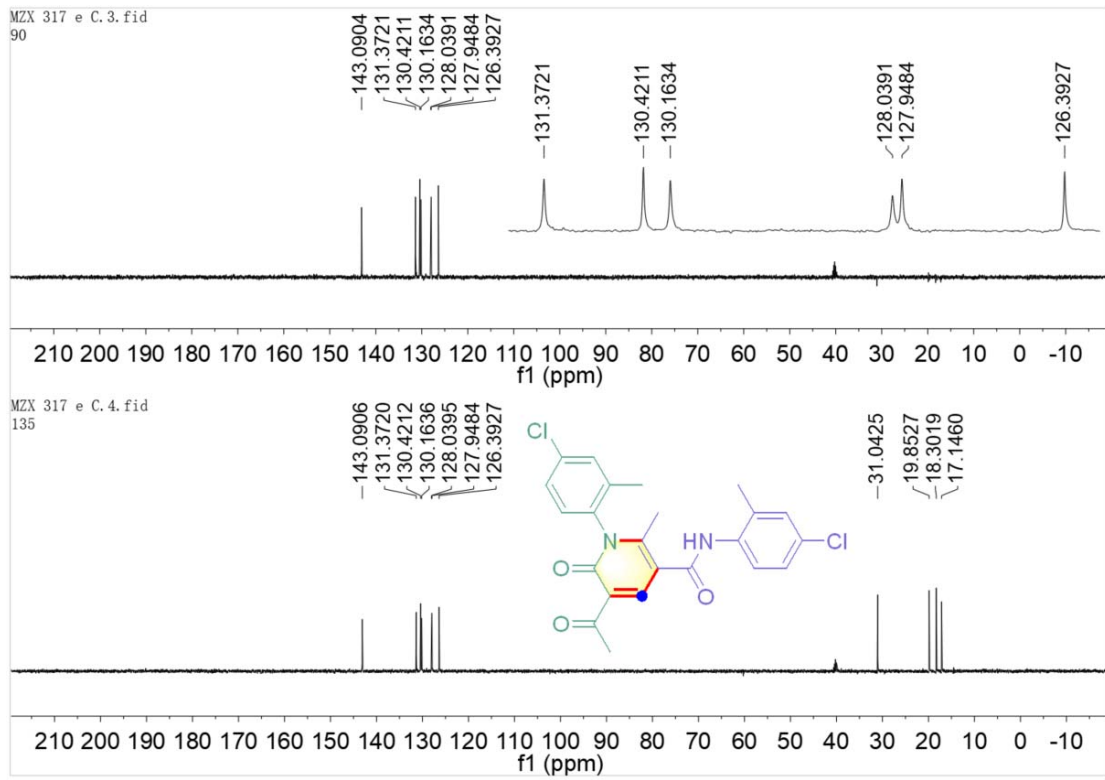

## 2e, <sup>1</sup>H NMR

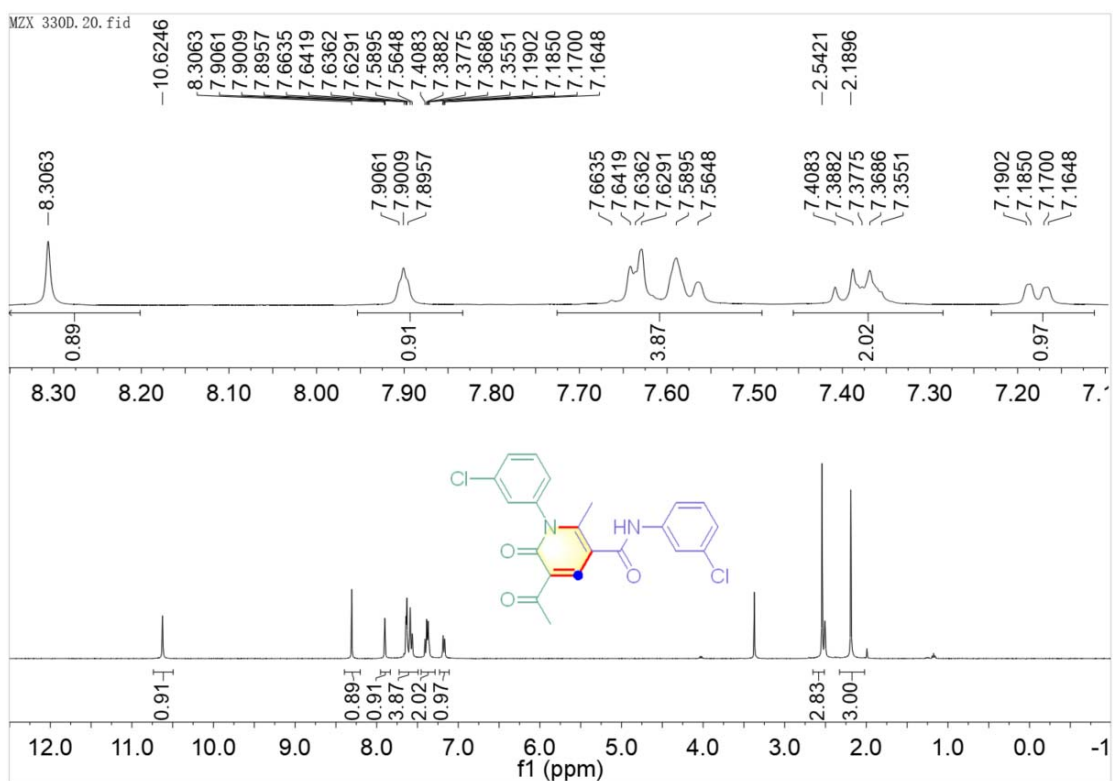

## <sup>13</sup>C NMR

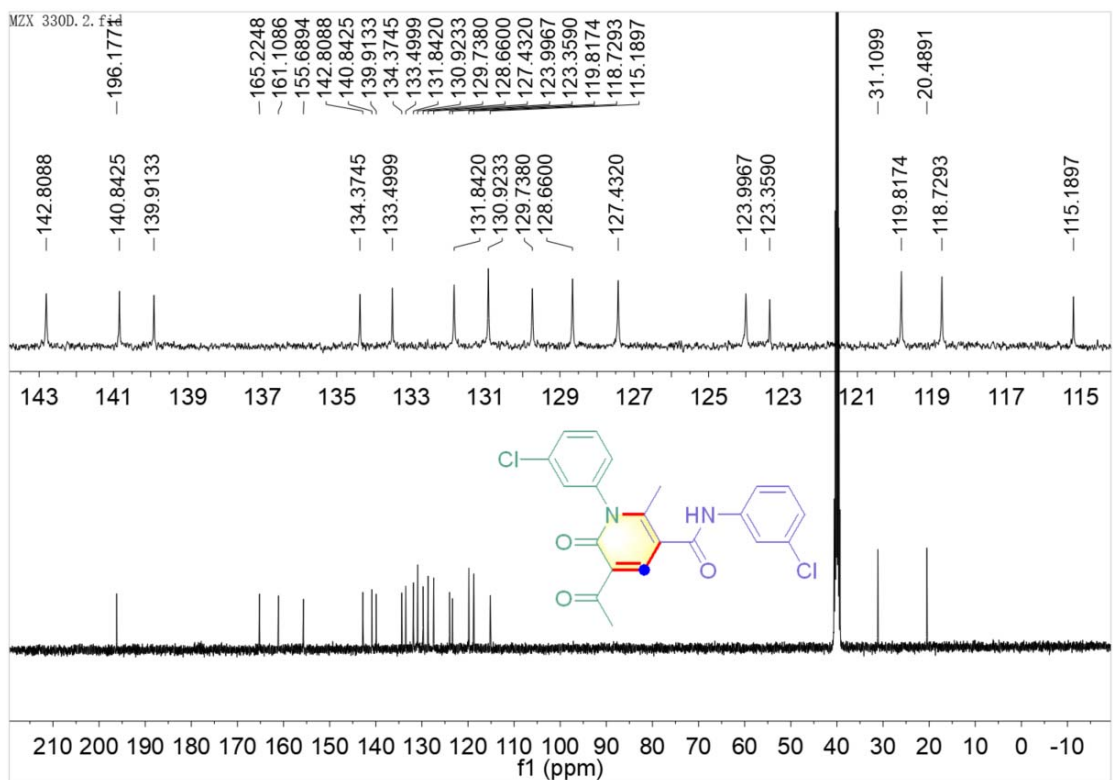

# DEPT 90 and DEPT 135

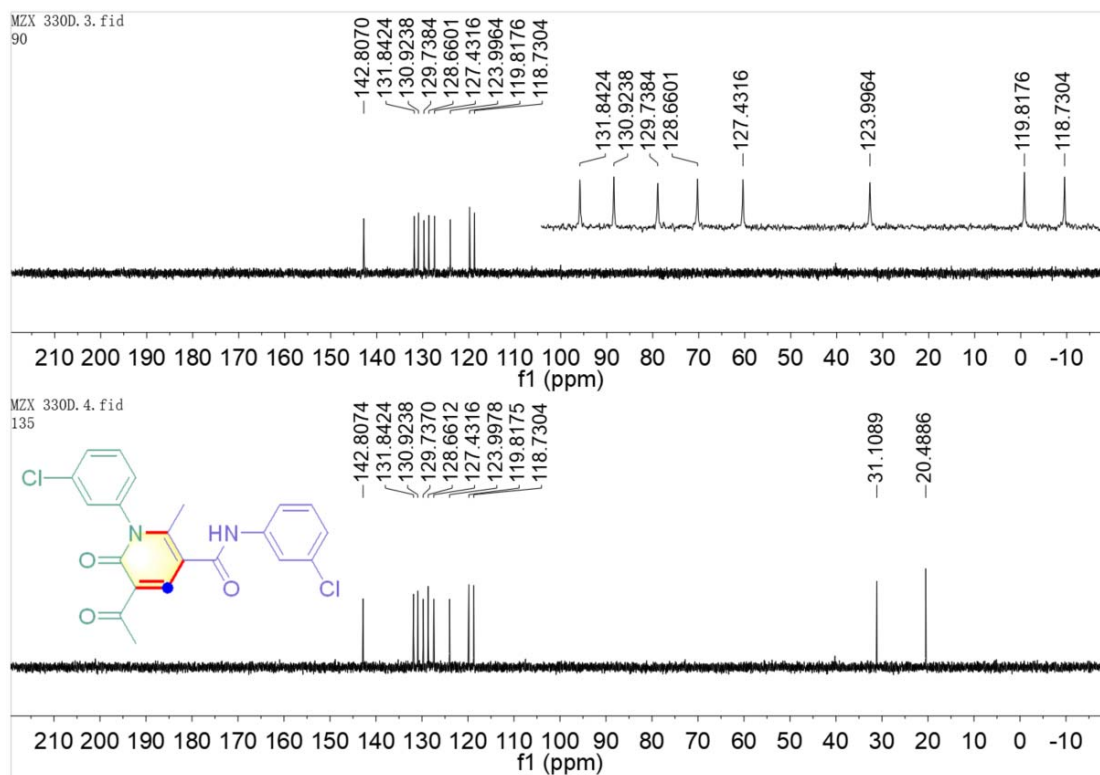

### 2f, <sup>1</sup>H NMR

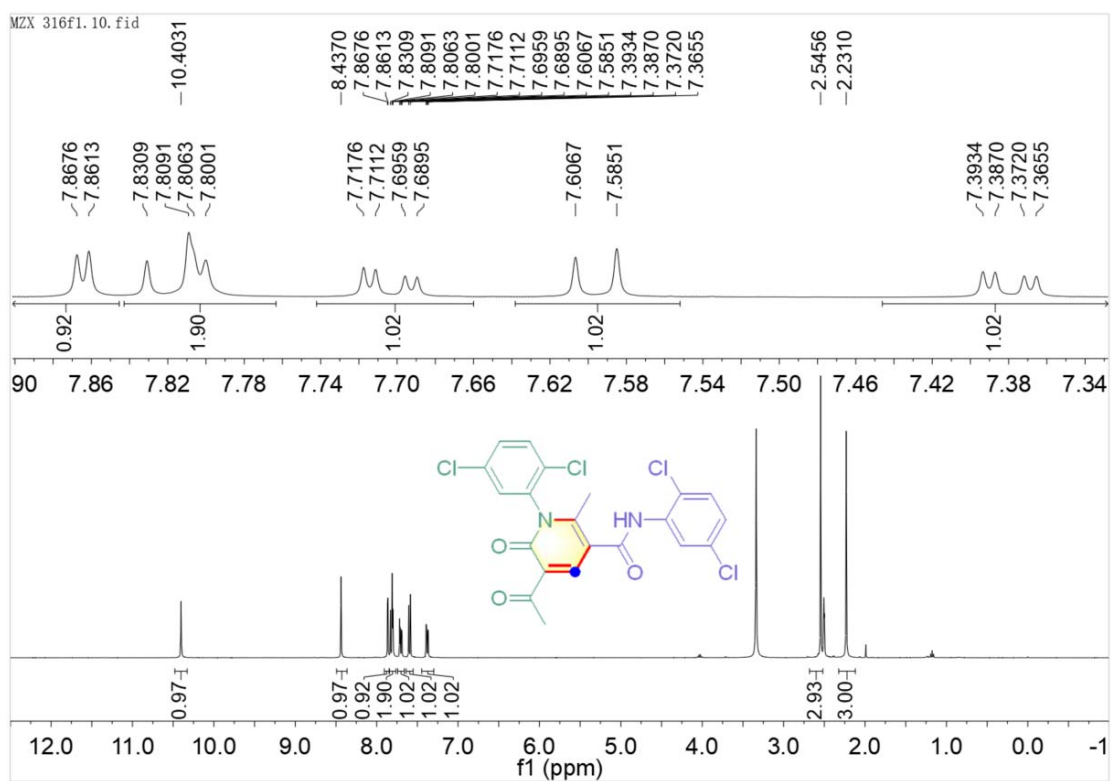

### <sup>13</sup>C NMR

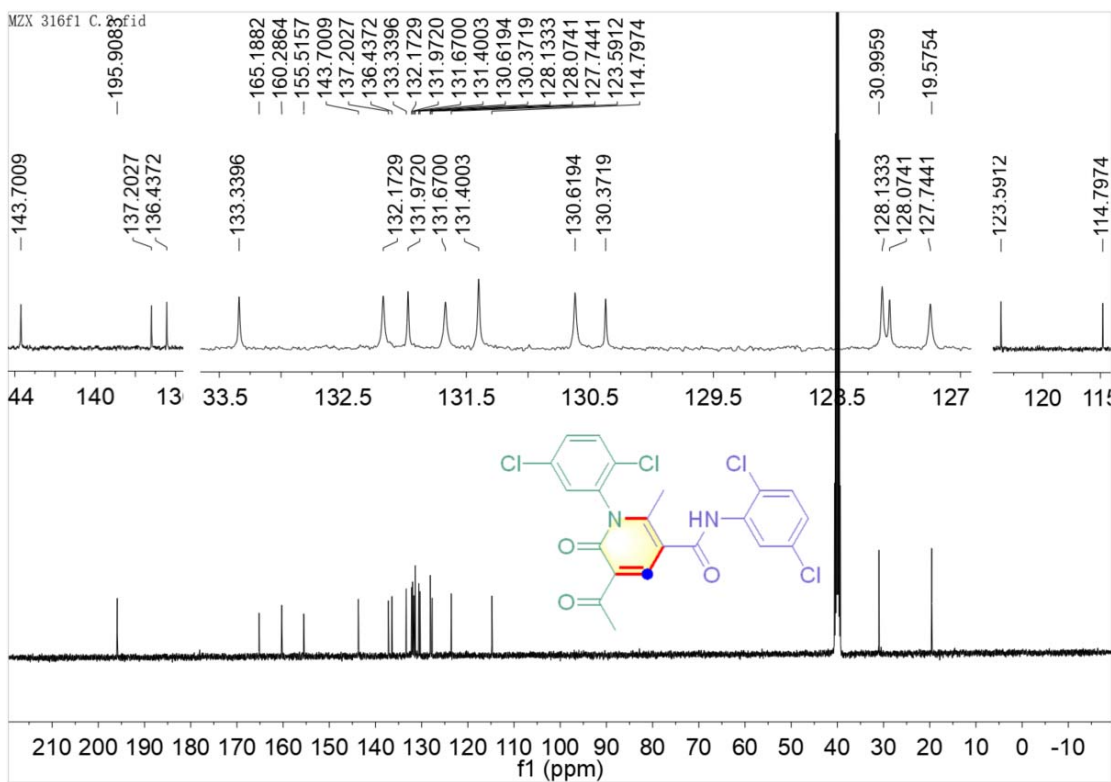

# DEPT 90 and DEPT 135

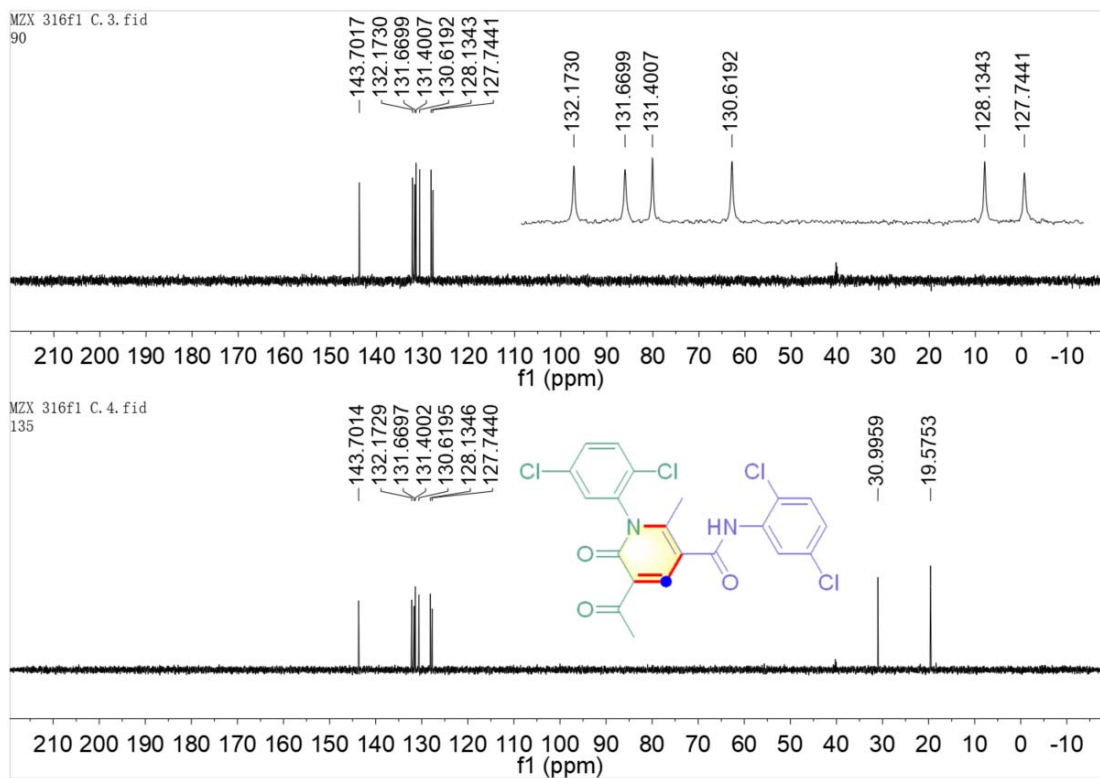

## 2g, <sup>1</sup>H NMR

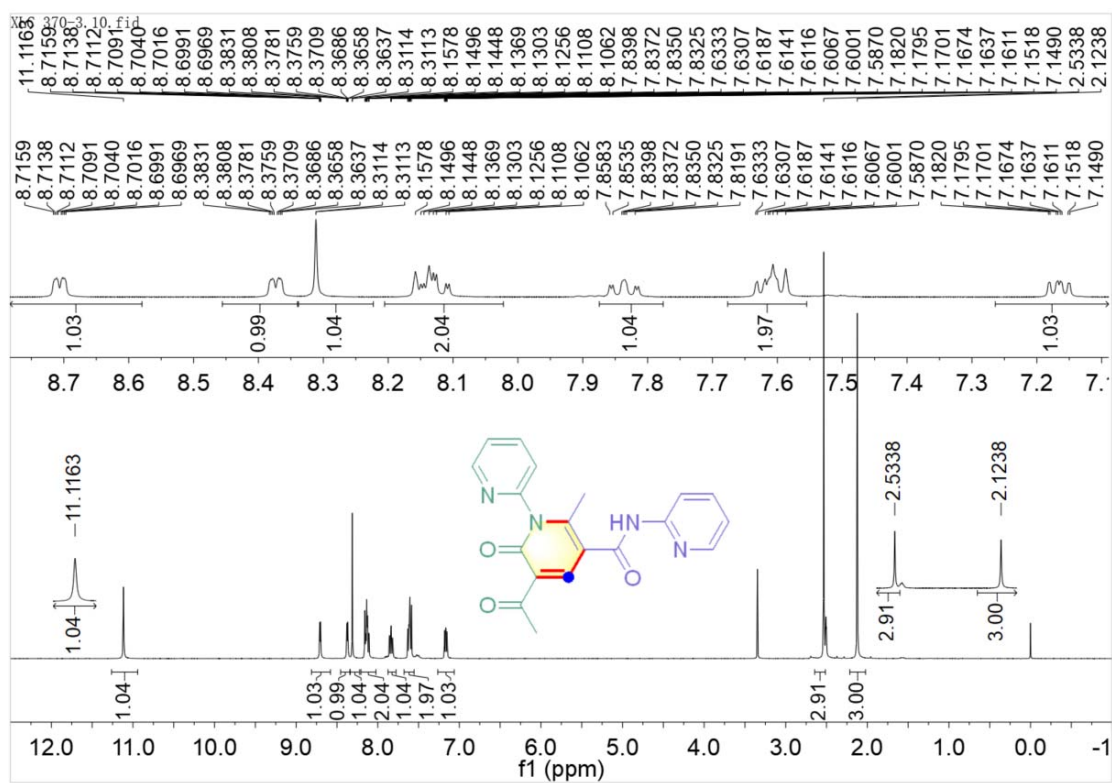

## <sup>13</sup>C NMR

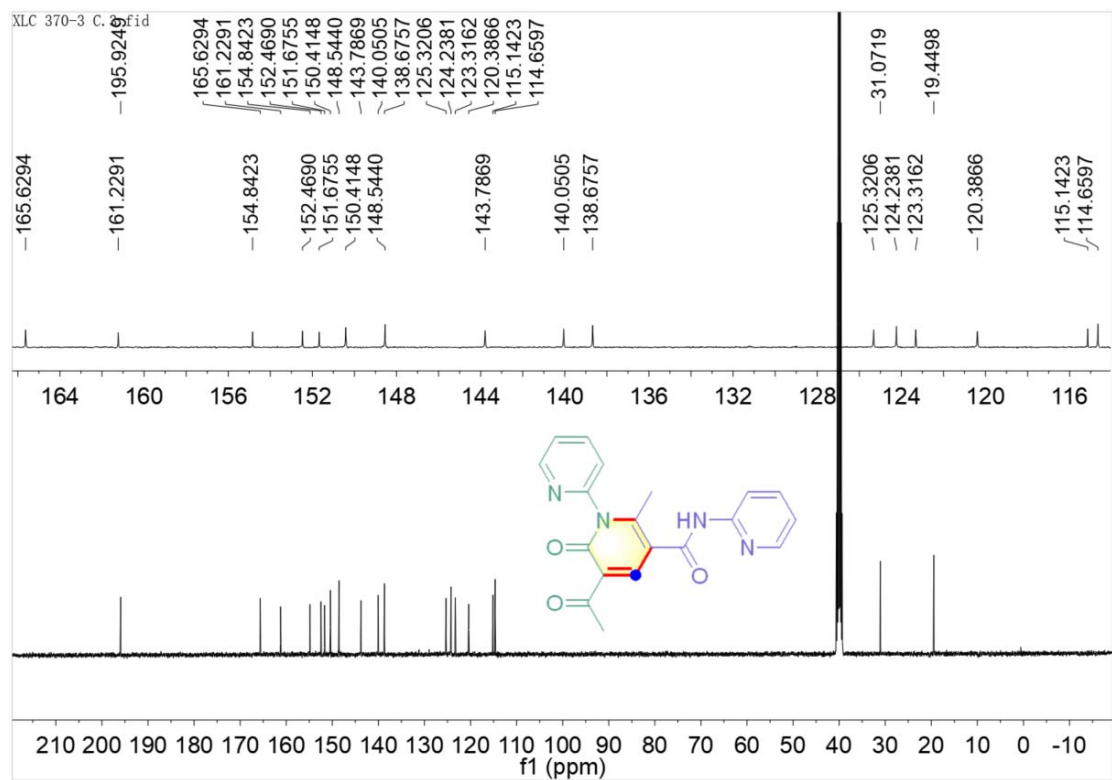



# DEPT 90 and DEPT 135

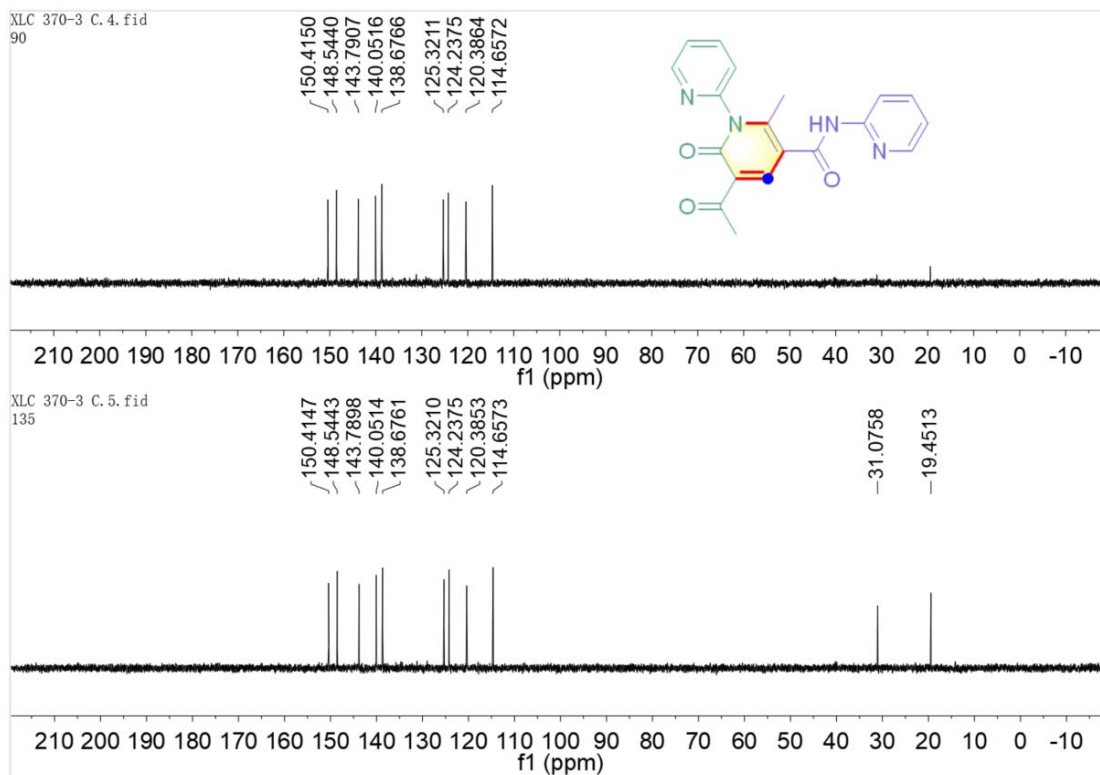

## 2h, <sup>1</sup>H NMR

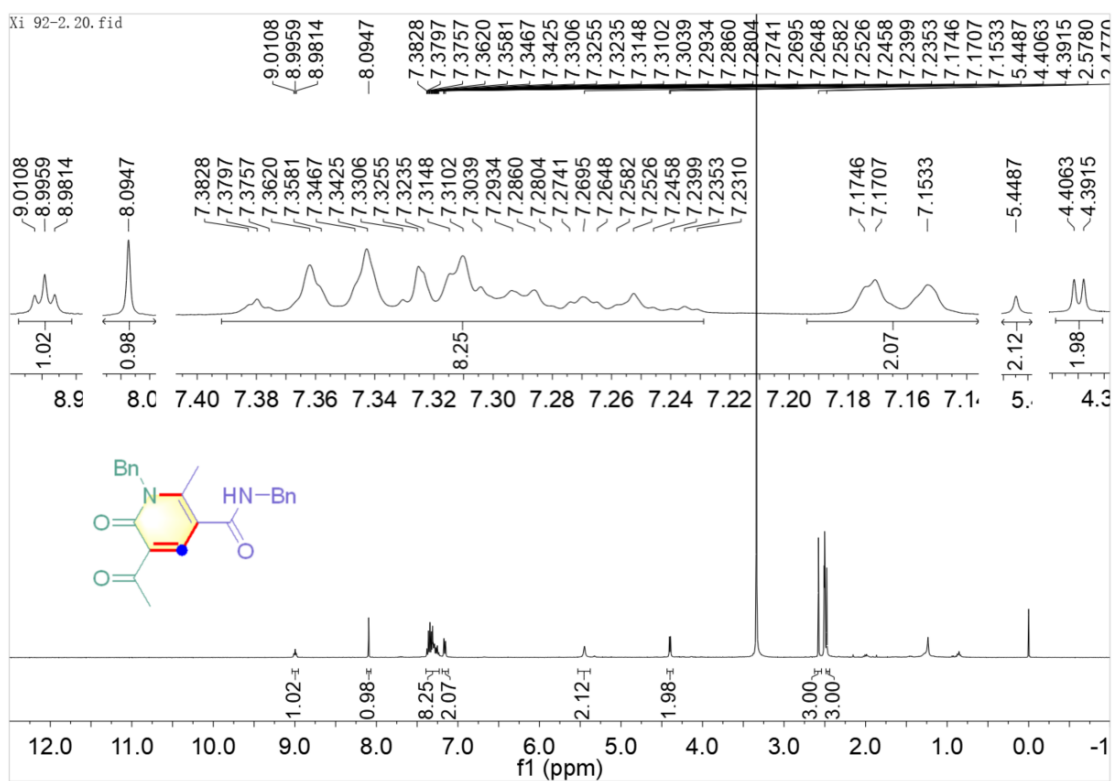

## <sup>13</sup>C NMR

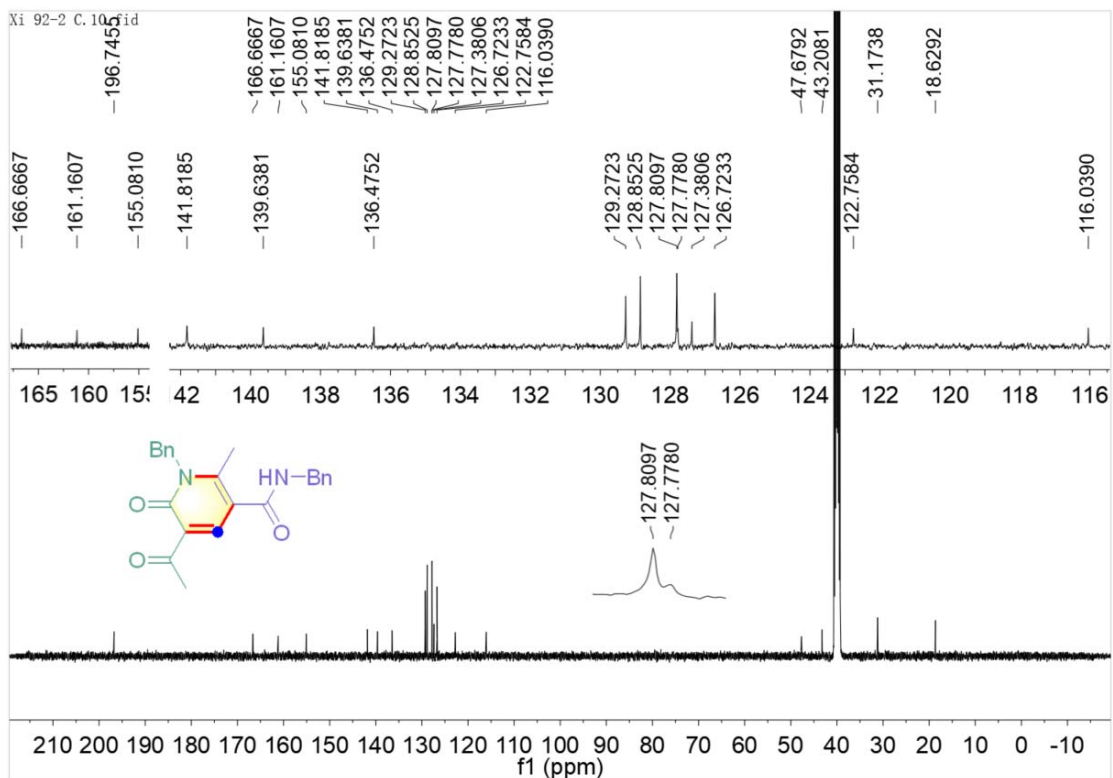

### DEPT 90 and DEPT 135

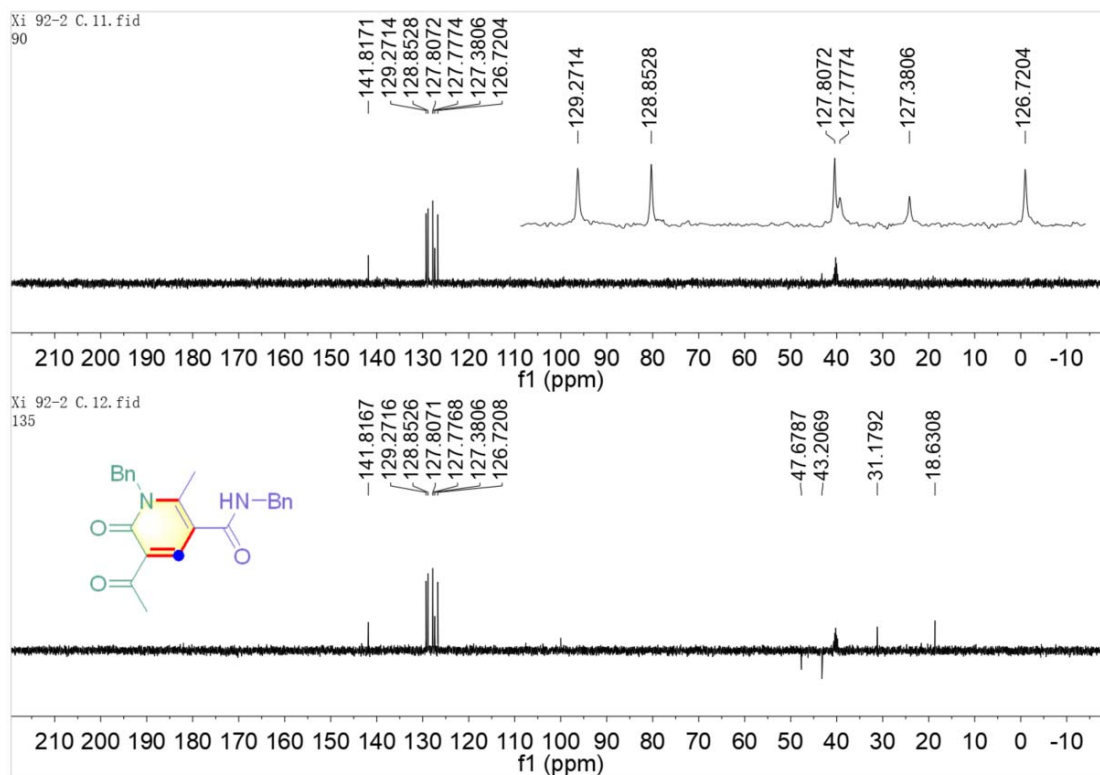

### 2i1, <sup>1</sup>H NMR

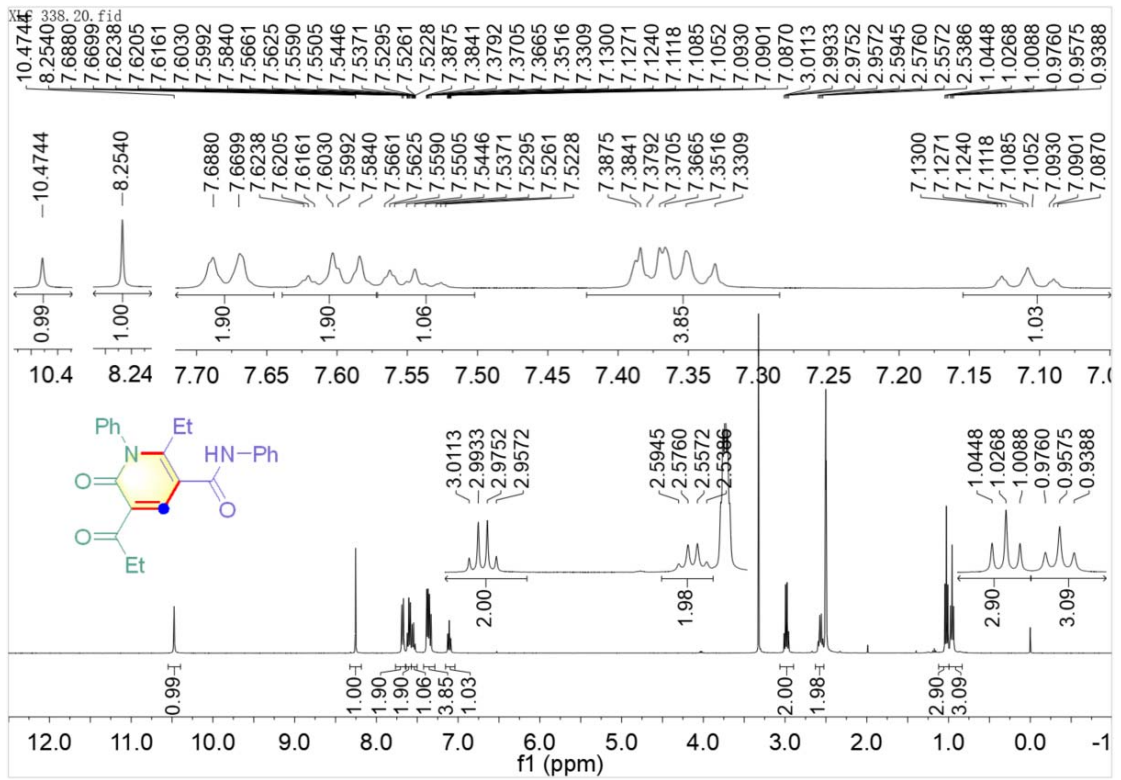

### <sup>13</sup>C NMR

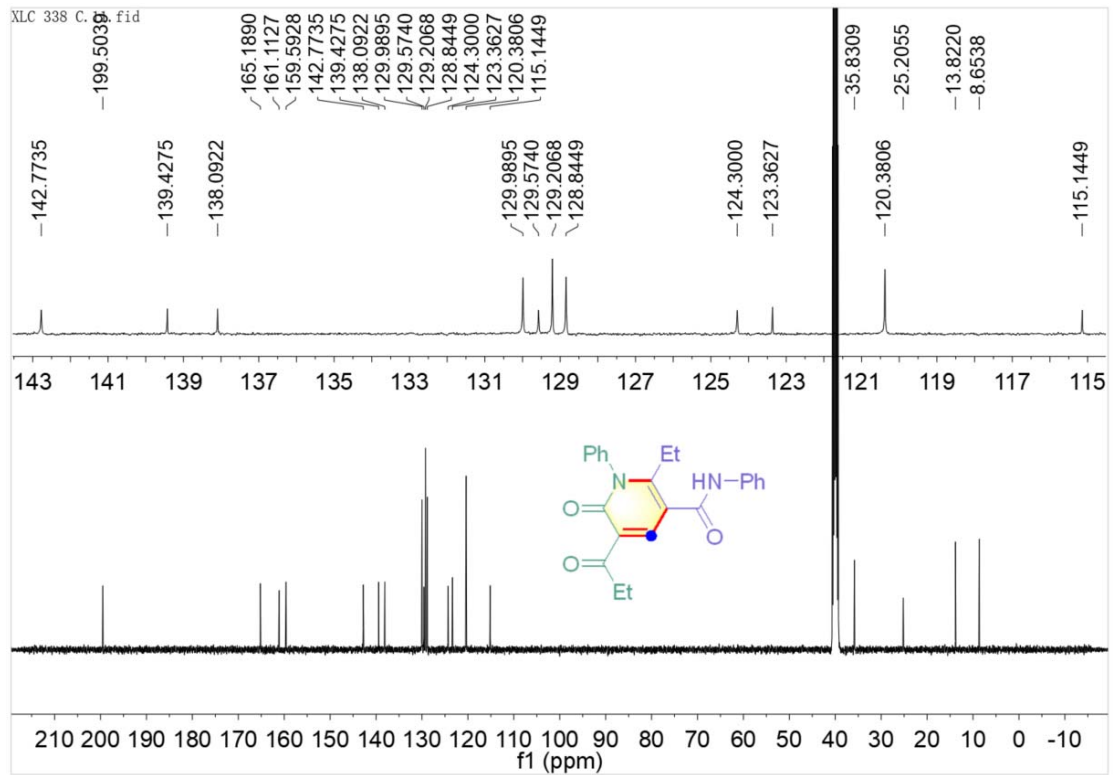

# DEPT 90 and DEPT 135

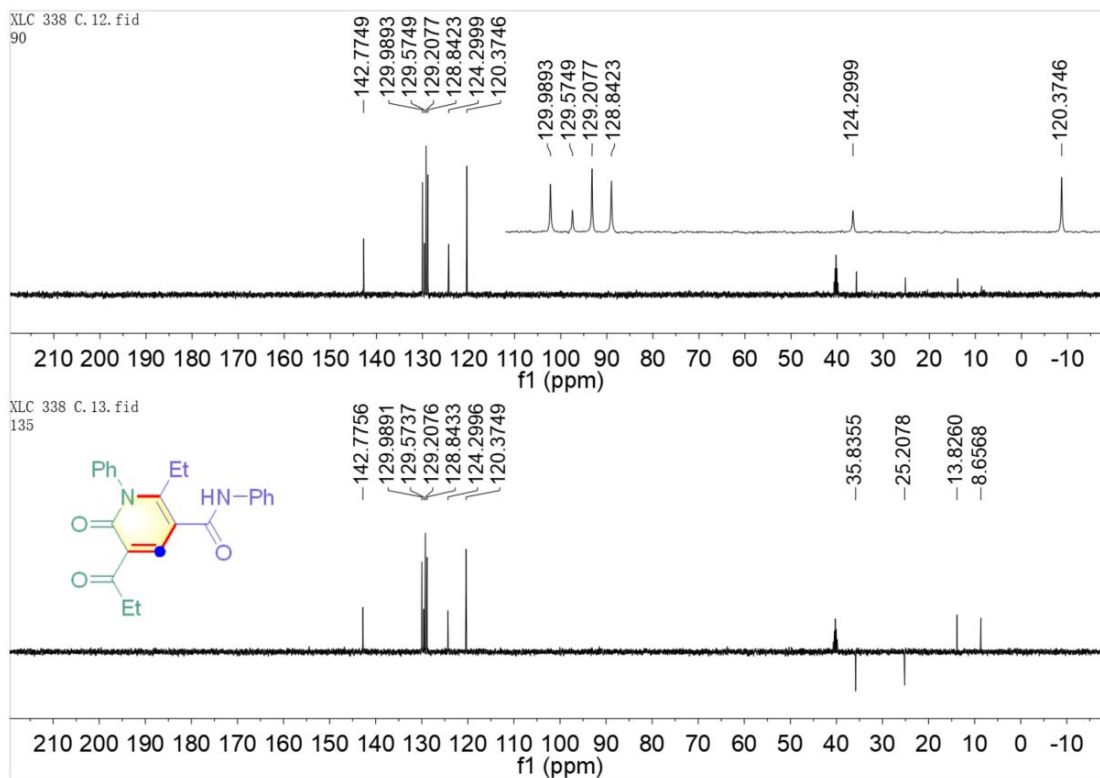

## 2i2, <sup>1</sup>H NMR

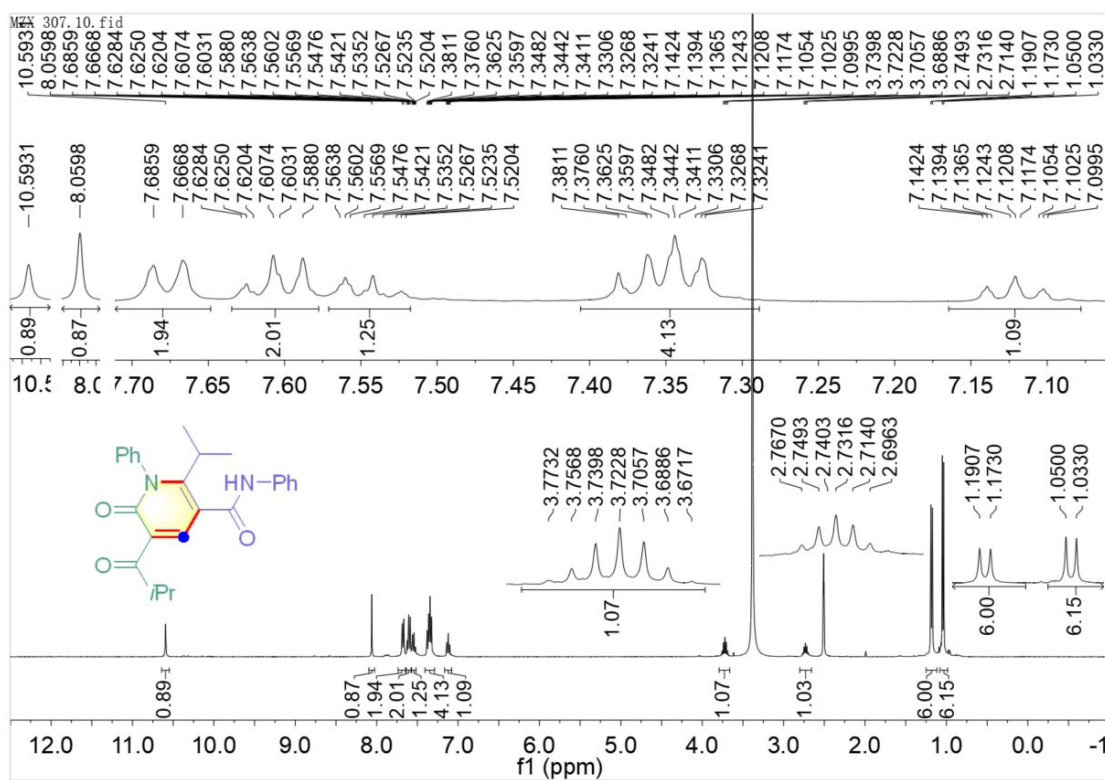

## <sup>13</sup>C NMR

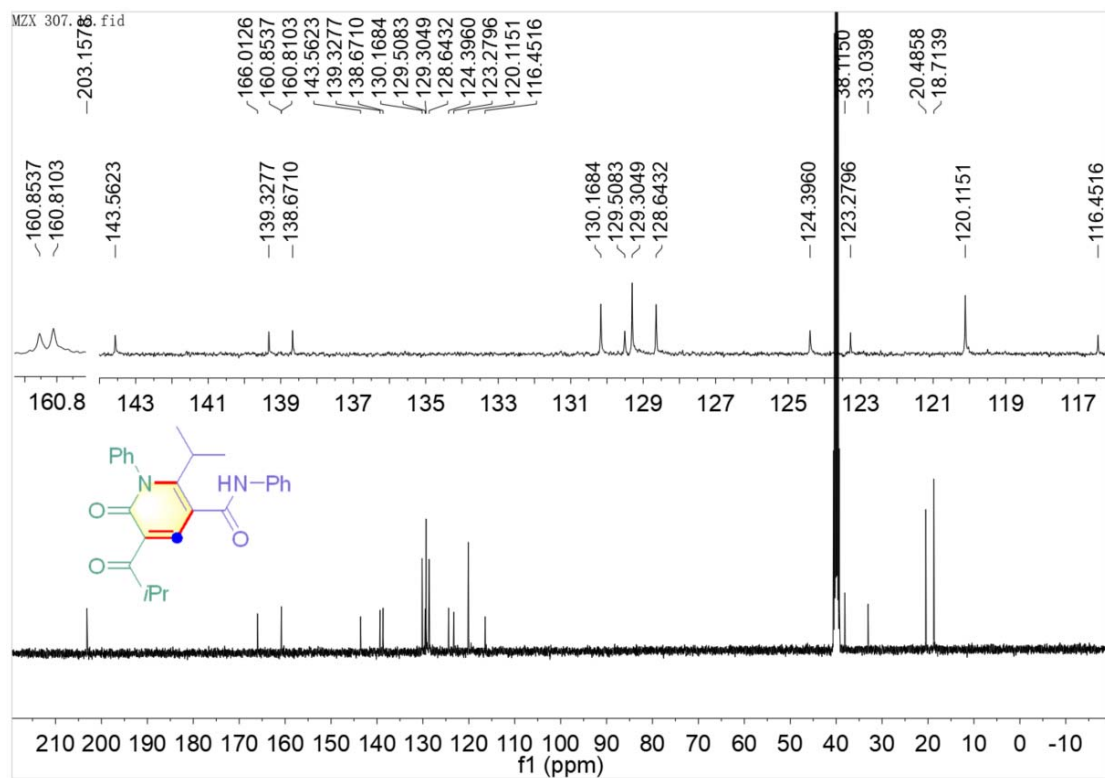

# DEPT 90 and DEPT 135

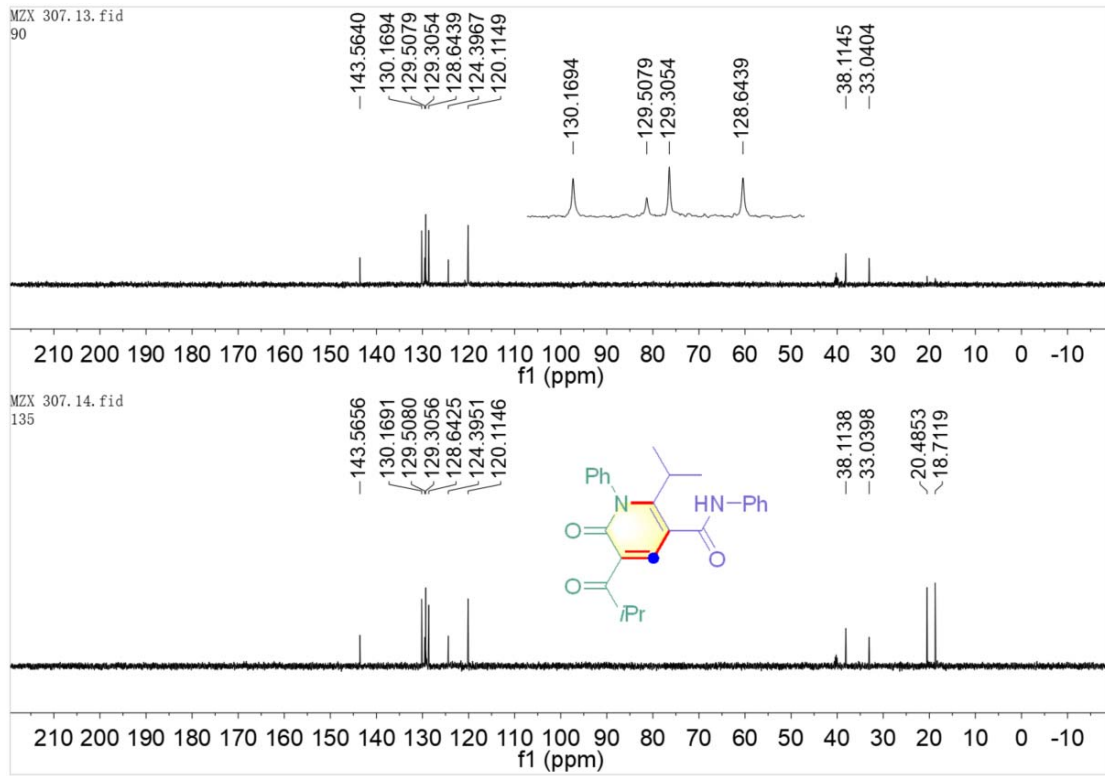

### 213, <sup>1</sup>H NMR

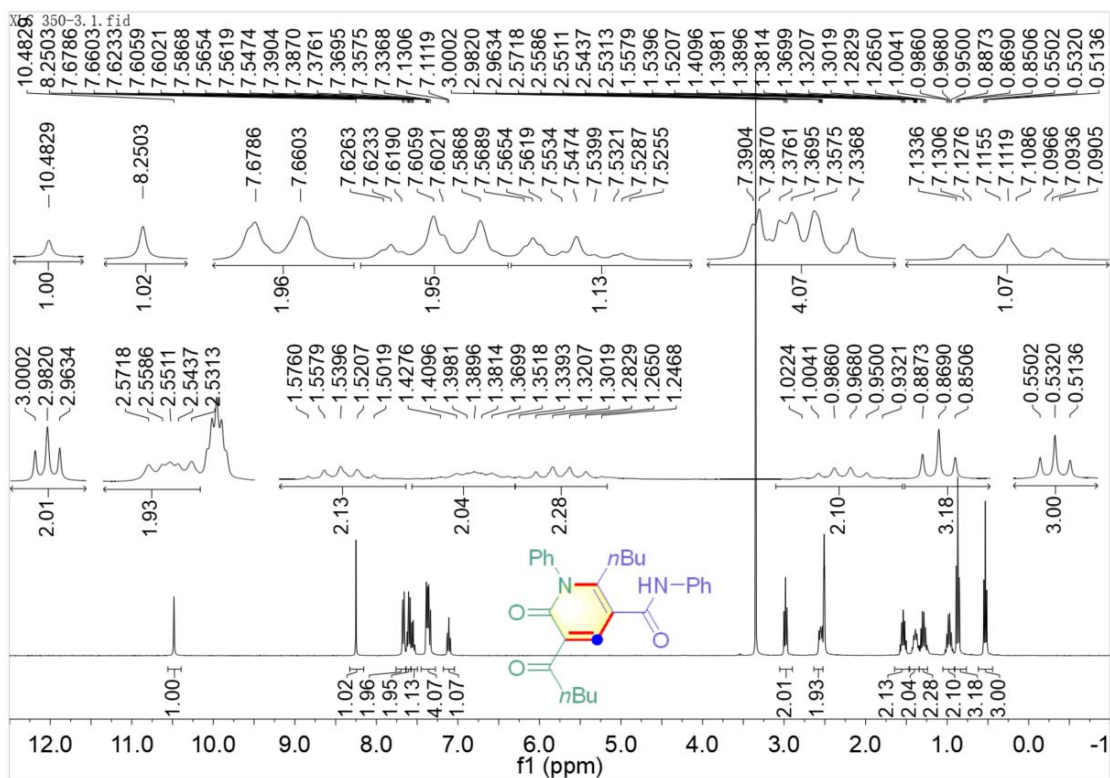

### <sup>13</sup>C NMR

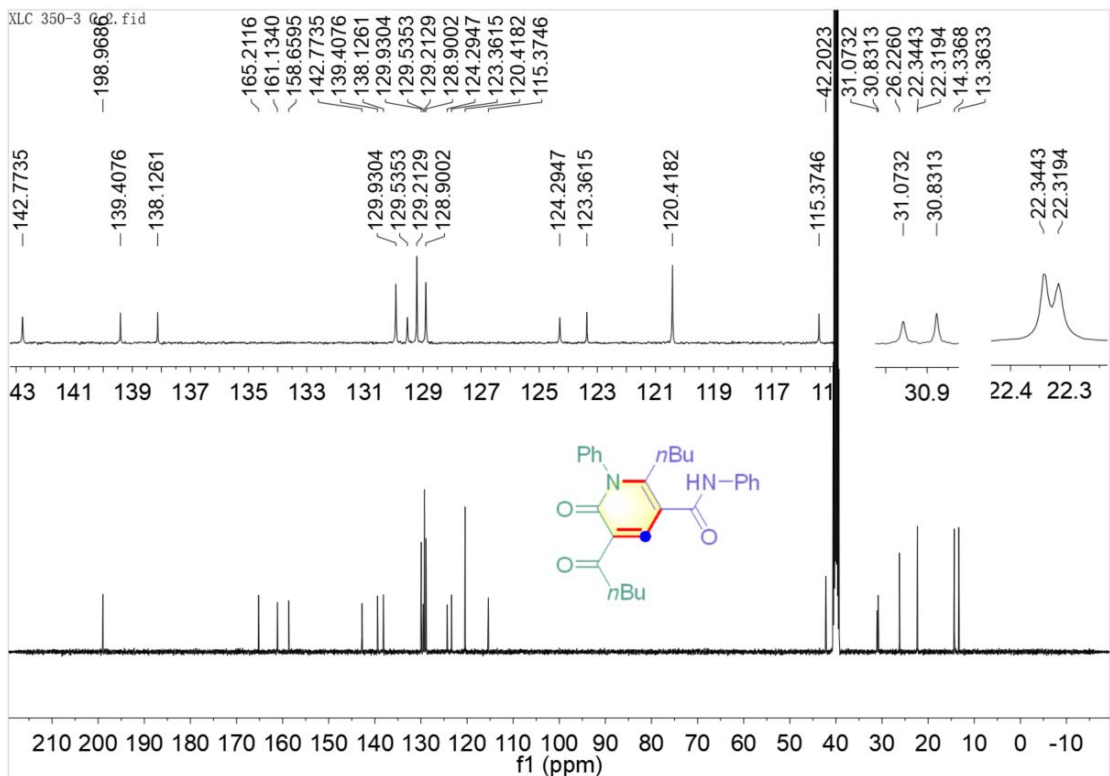



# DEPT 90 and DEPT 135

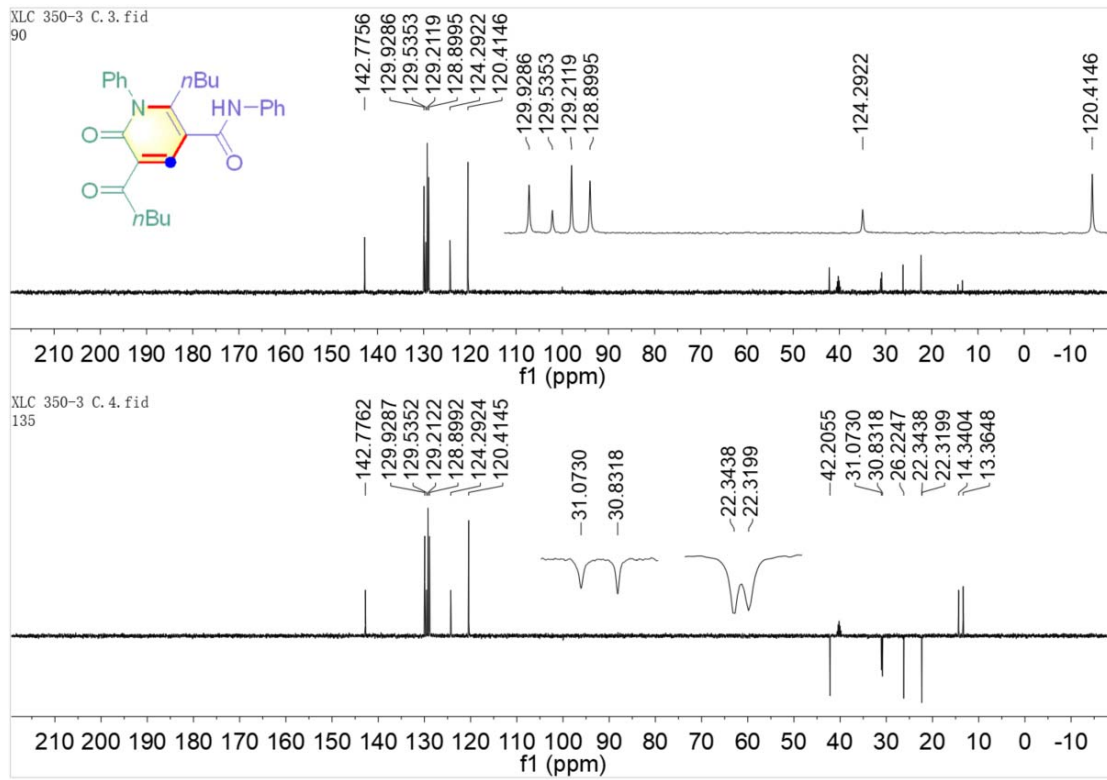

2i4, <sup>1</sup>H NMR

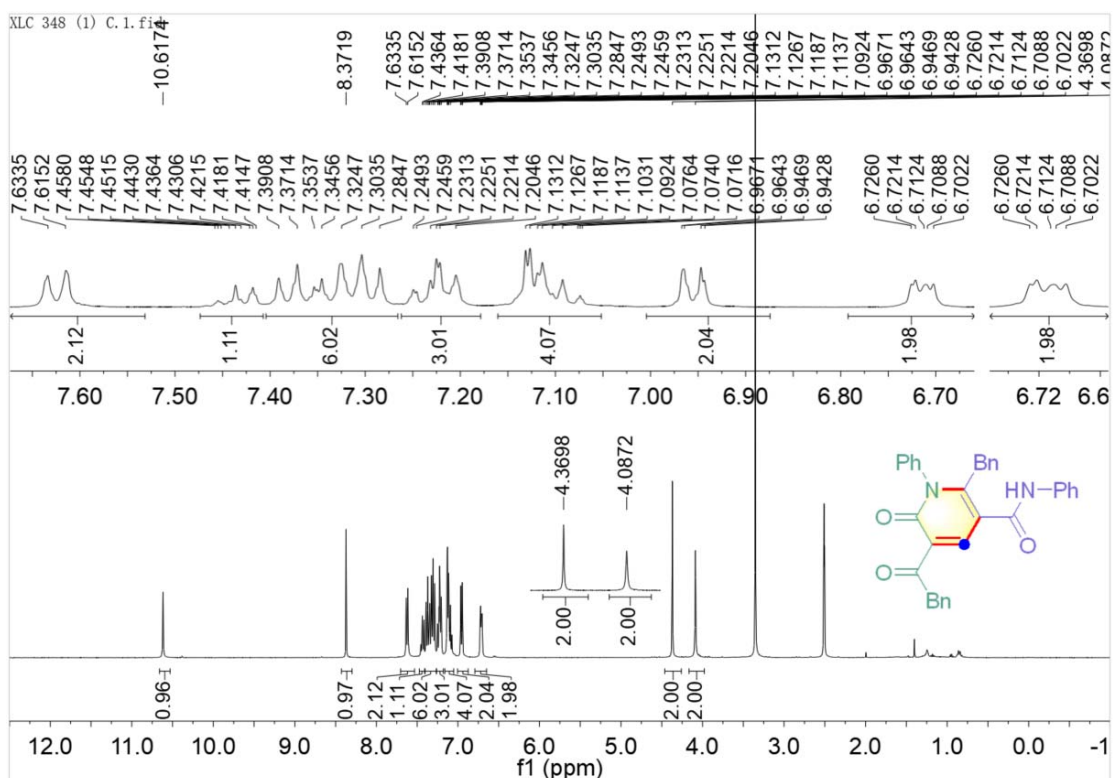

<sup>13</sup>C NMR

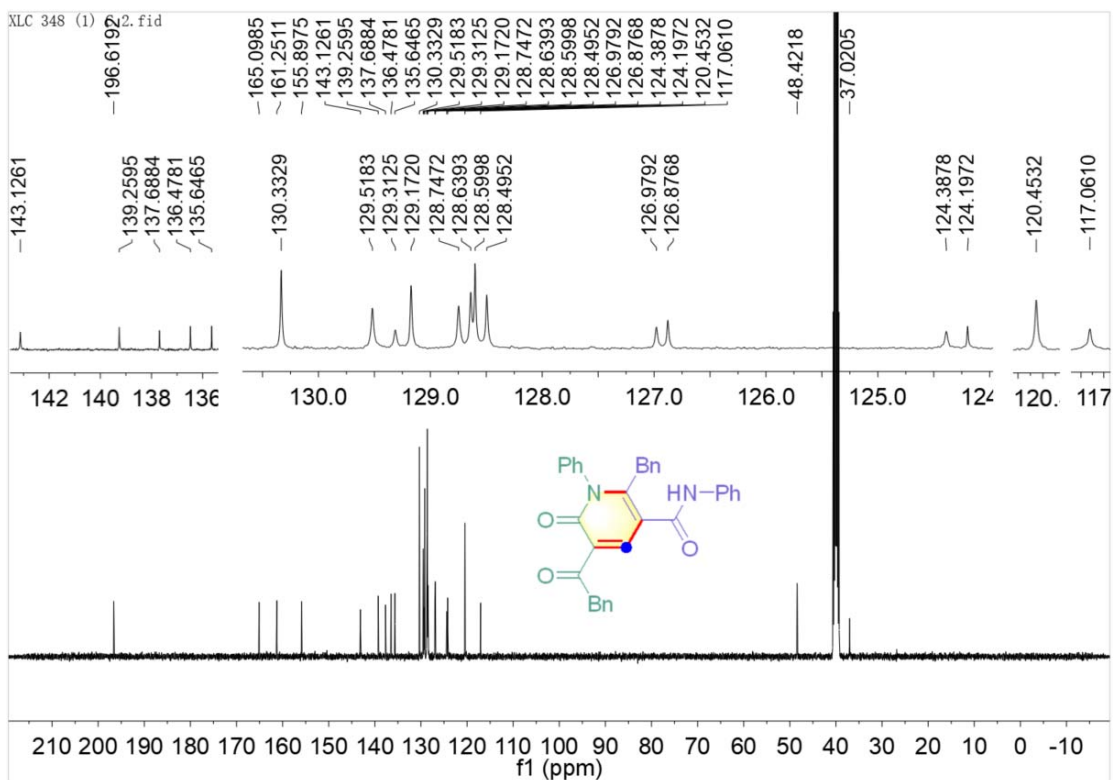

# DEPT 90 and DEPT 135

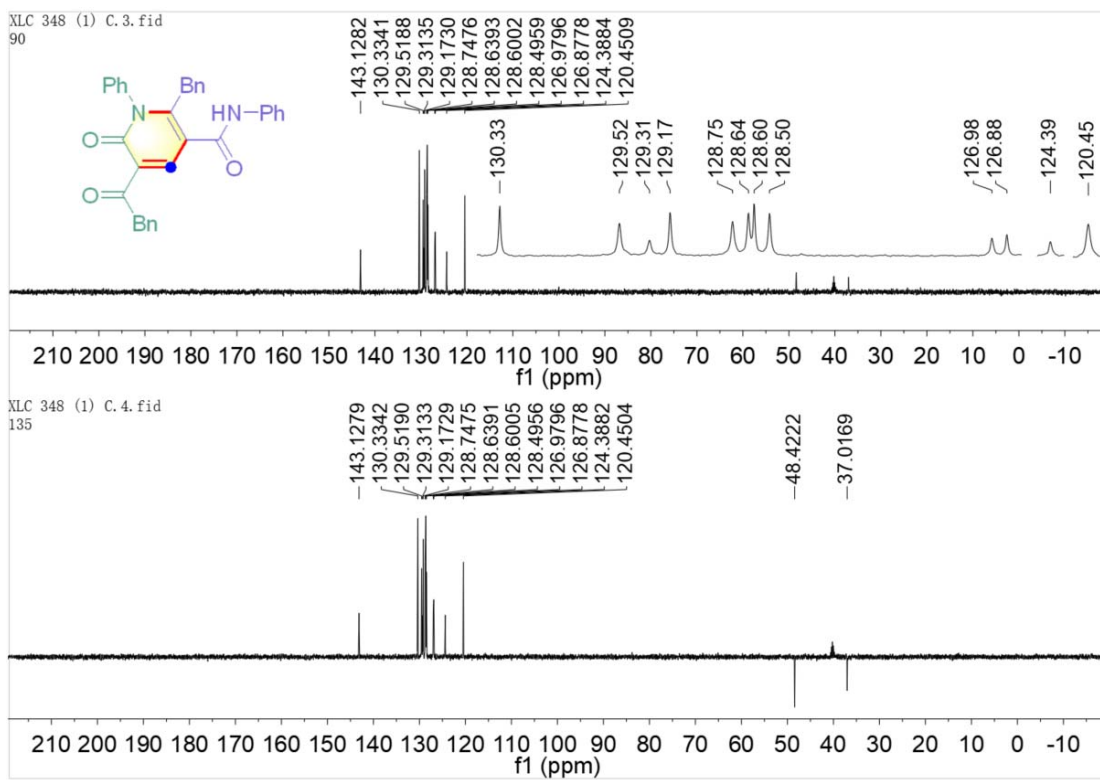



# DEPT 90 and DEPT 135

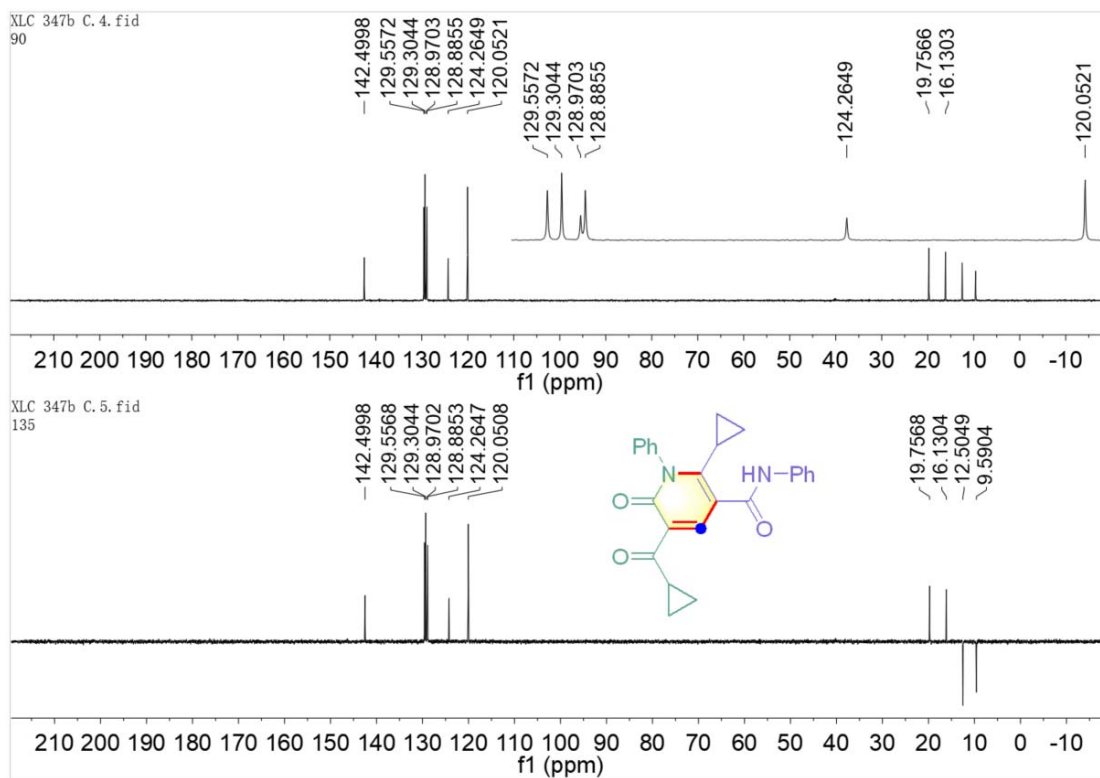



# DEPT 90 and DEPT 135

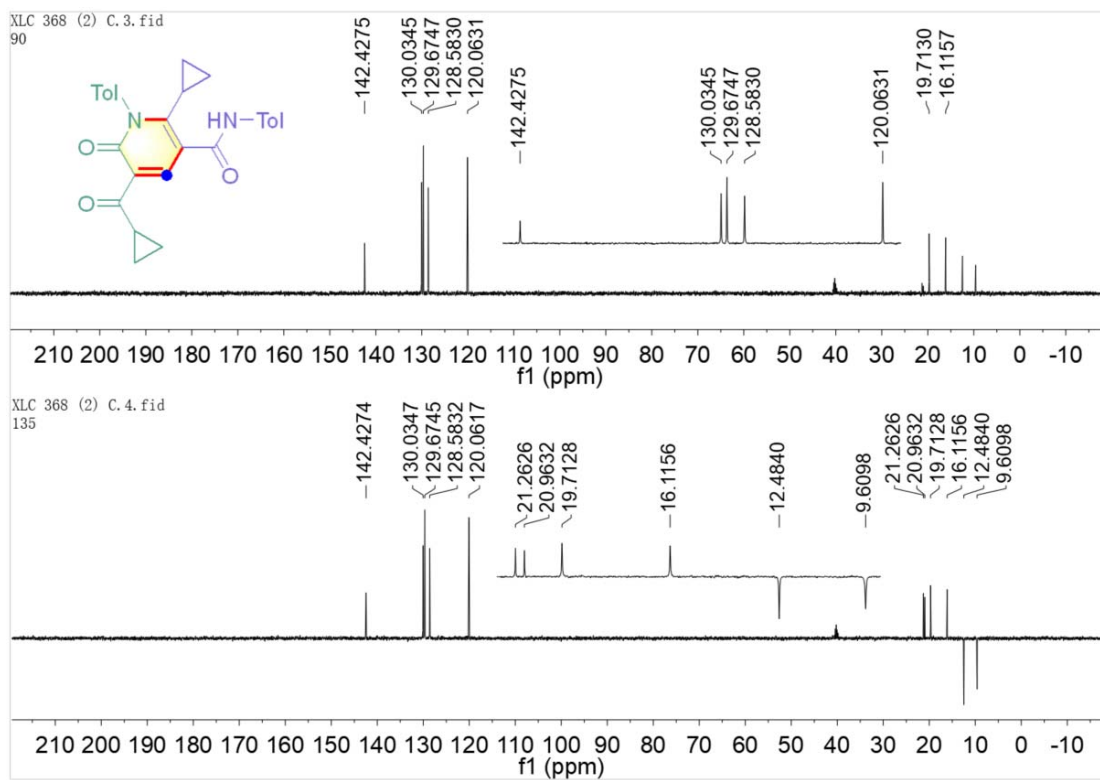

### 3 <sup>1</sup>H NMR

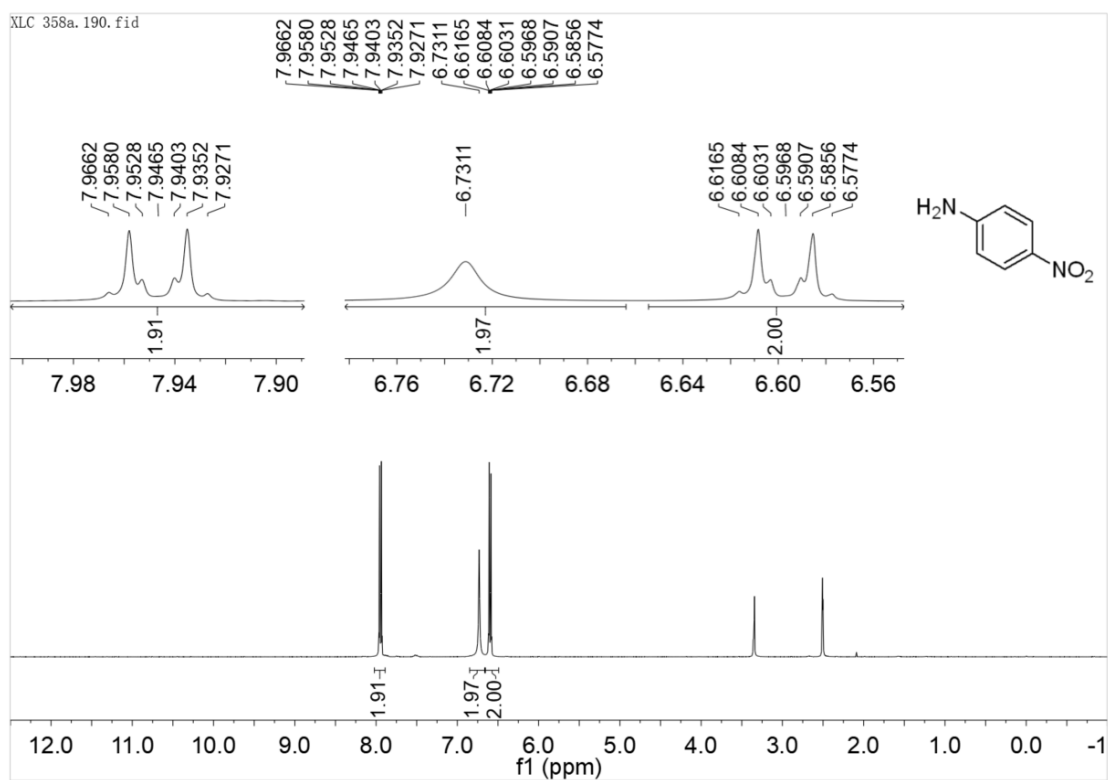

### <sup>13</sup>C NMR

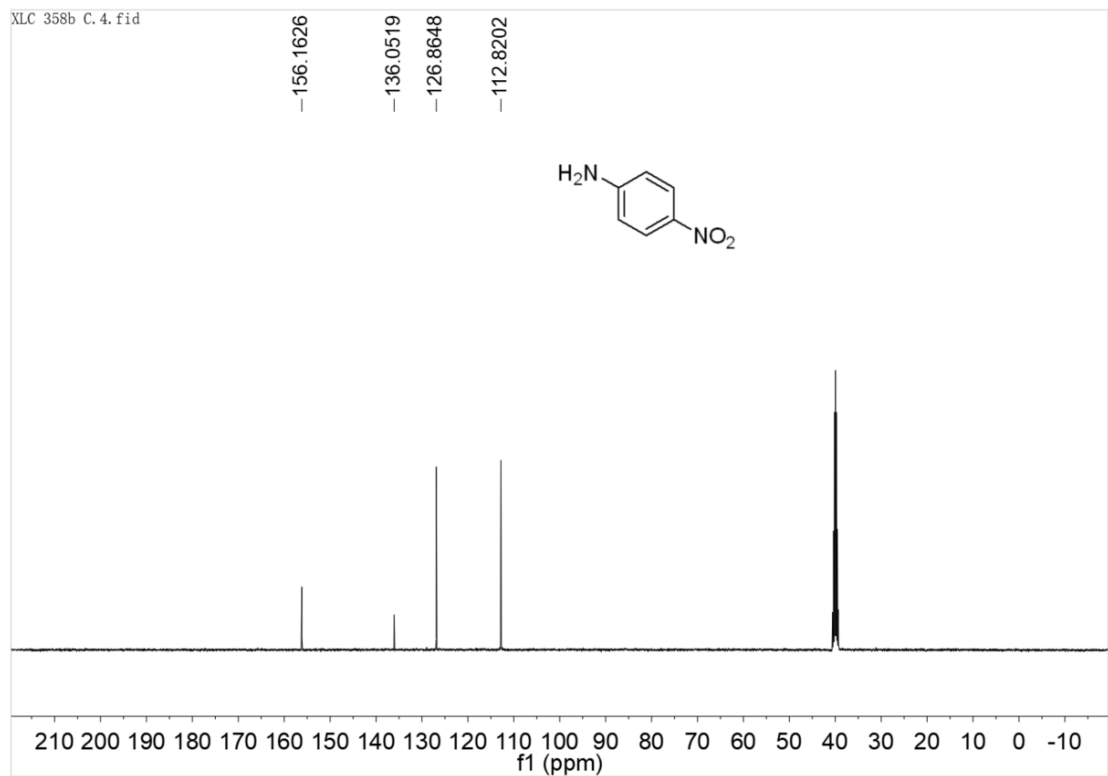



# DEPT 90 and DEPT 135

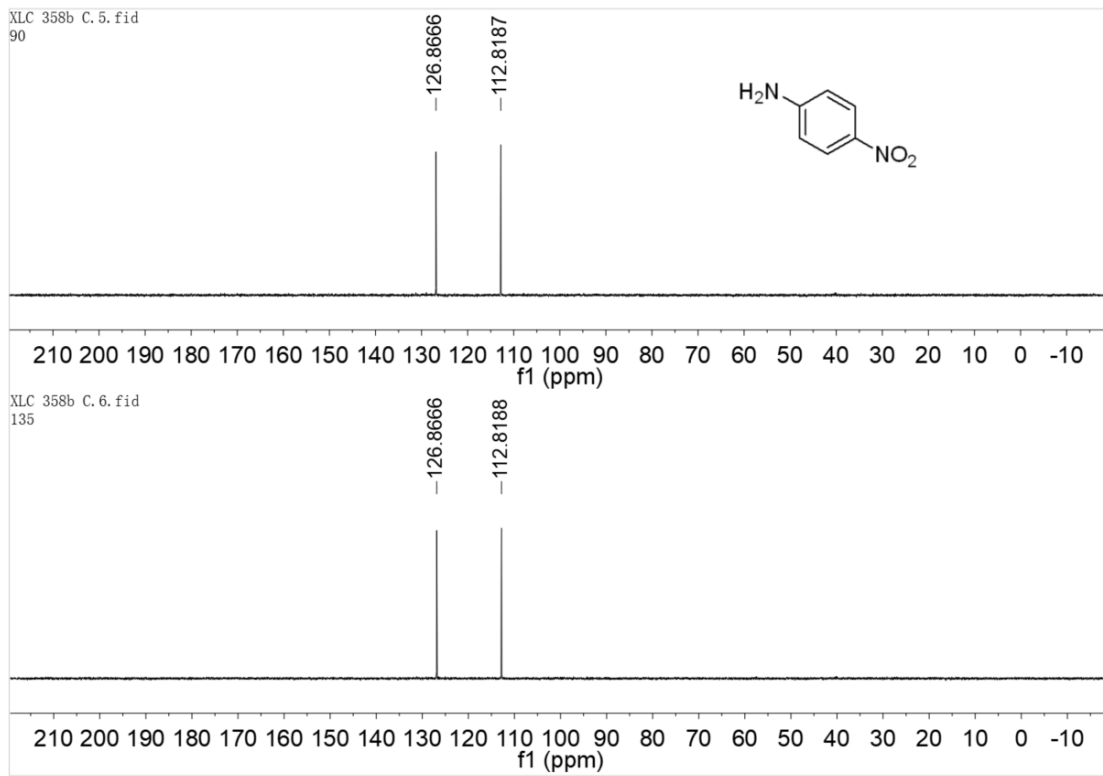

Supplement: d1ob02379a1.pdf [file d1ob02379a1.pdf]
